# Supplementary material for: Molecular xenomonitoring for identifying Plasmodium parasites and blood meal sources in mosquitoes of the southern Rift Valley Lakes, South Ethiopia
Source: Research Square preprint supplement (doi:10.21203/rs.3.rs-7284584/v1), 2025-09-01
Supplement: Supplementary file 1 [file 7f8183d9dd404c6e9b6bb657.pdf]

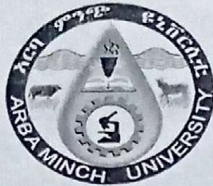

**አርባ ማንቅ ዩኒቨርሲቲ**  
**ARBA MINCH UNIVERSITY**  
**ተቋማዊ የምርምር ስነ-ምግባር ግምገማ ቦርድ ቢሮ**  
**Institutional Research Ethics Review Board (IRB) Office**

ፖ.ሣ.ቁ. 21  
P.O.Box  
አርባምንቅ ኢትዮጵያ  
Arbaminch, Ethiopia

ስልክ +251-46-8814014  
+251-46-1817742  
Tel. +251-46-8810070  
+251-46-8810534

ቁጥር IRB/1437/2023  
Ref. No.  
ቀን April 03, 2023 G.C  
Date

➤ **Principal Investigator:** Nigatu Eligo (PhD candidate)

**Supervisors:** Fekadu Massebo (PhD), Daniel Woldeyes (PhD), Bernt Lindtjörn (MD, PhD, Professor)

**Protocol Title:** Assessing the impact of house screening and Ivermectin administration to cattle on residual malaria transmission using entomological indicators in Southwest Ethiopia: A Cluster Randomized Control Trial

**Subject: Ethical Approval of a Research Proposal**

Dear Researchers,

The institutional research ethics review board (IRB) at college of medicine and health sciences of Arba Minch University has reviewed the aforementioned research protocol with special emphasis on the following points:

- |     |                                                     |       |                             |
|-----|-----------------------------------------------------|-------|-----------------------------|
| 1.  | Are all principles considered?                      |       |                             |
| 1.1 | Respect for person                                  | ✓ Yes | <input type="checkbox"/> No |
| 1.2 | Beneficence                                         | ✓ Yes | <input type="checkbox"/> No |
| 1.3 | Justice                                             | ✓ Yes | <input type="checkbox"/> No |
| 2.  | Are the objectives of the study ethically achieved? | ✓ Yes | <input type="checkbox"/> No |
| 3.  | Are the proposed research methods ethically sound?  | ✓ Yes | <input type="checkbox"/> No |

Based on the aforementioned ethical assessment, the IRB has:

- |                                |                                     |                                                         |
|--------------------------------|-------------------------------------|---------------------------------------------------------|
| A. Approved for implementation | <input checked="" type="checkbox"/> | - Approval period from April 03, 2023 to April 02, 2024 |
| B. Conditionally Approved      | <input type="checkbox"/>            | - Element approved: protocol No: NE1437                 |
| C. Not Approved                | <input type="checkbox"/>            | - Follow-up report expected in three months             |

Obligations of the Researchers:

- Should comply with the standard international scientific and ethical guidelines
- All amendments and changes made in protocol and consent form needs IRB approval
- The PI should report SAE within 3 days of the event
- End of study, including manuscript should be reported to the IRB

Yours faithfully,

Manaye Yihune Teshale

ተቋማዊ የምርምር ስነ-ምግባር  
ግምገማ ቦርድ ሰብሳቢ  
Chairperson, Institutional  
Research Ethics Review Board

**CC:**

- ✳ Research publication, documentation and dissemination directorate office
- ✳ CNS-PG Coordination office
- ✳ IRB-AMU Office
- A.M.U

E-mail: irb.amu@yahoo.com

መልስ ሲጽፉልን የኛን ቁጥር ይጥቀሱ  
When replying please indicate our reference No.

+251-46-8810279  
Fax: +251-46-8810820
