# Supplementary material for: Molecular xenomonitoring for identifying Plasmodium parasites and blood meal sources in mosquitoes of the southern Rift Valley Lakes, South Ethiopia
Source: Research Square preprint supplement (doi:10.21203/rs.3.rs-7284584/v1), 2025-09-01
Supplement: Supplementary file 1 [file 137f0e624d5739f8f9528c0e.docx]

| Hosts | Alge | Delbo | Mole | Ankober | Fura | Umo Lante | Lante | Sile | Shelle Mella | Kola Shelle | Chano Mile | Chano Chalba | Total |
| --- | --- | --- | --- | --- | --- | --- | --- | --- | --- | --- | --- | --- | --- |
| Cattle | 74 | 92 | 22 | 59 | 105 | 118 | 57 | 246 | 361 | 320 | 82 | 60 | 1596 |
| Goat | 280 | 101 | 47 | 62 | 144 | 92 | 64 | 134 | 107 | 127 | 44 | 89 | 1291 |
| Sheep | 0 | 0 | 0 | 0 | 1 | 2 | 17 | 5 | 16 | 144 | 62 | 30 | 277 |
| Chicken | 145 | 202 | 180 | 235 | 110 | 172 | 217 | 177 | 215 | 180 | 180 | 121 | 2134 |
| Human | 694 | 654 | 609 | 672 | 586 | 654 | 533 | 523 | 1059 | 1034 | 564 | 629 | 8211 |

File 1: - Number of hosts recorded in each kebele
