# Supplementary material for: Molecular xenomonitoring for identifying Plasmodium parasites and blood meal sources in mosquitoes of the southern Rift Valley Lakes, South Ethiopia
Source: Research Square preprint supplement (doi:10.21203/rs.3.rs-7284584/v1), 2025-09-01
Supplement: Supplementary file 2 [file 32c75142f1c48fe864df2132.xlsx]

## Sheet: nigatu_all_hh
date_int	district	Kebele	fam_size	do_hh_have_bednet	sumsbnlt	floor_material	floor_material_1	floor_material_2	floor_material_3	floor_material_4	sepecify_other_floormat	main_roofmaterial	other_rooftopmat	ceiling	ceiling_material	other_ceiling_material	material_exteriorwall	other_exteriorwallmatt	material_interiorwall	other_interiorwallmatt	eaves_inhouse	opening_crackhouse	number_cracks	no_rooms	doors_number	windows_number	own_livestock	num_cattles	equines	goats	sheep	calves_oneyear	hh_poultary	chickens	house_spreyed_IRS	repainted_replastered_washed_IRS
2023-08-01	Mirab Abaya	Delbo	1	2		1	1	0	0	0		2		1	5		2		2		2	2		3	2	3	2						2		2
2023-08-05	Mirab Abaya	Delbo	6	1	0	1	1	0	0	0		2		1	5		9	Bcika ina kelem yetekeba	9	Bcika ina kelem yetekeba	2	2		3	2	3	1	1	0	0	0	1	1	4	1	2
2023-08-05	Mirab Abaya	Delbo	6	1	0	3	0	0	1	0		2		1	2		2		2		2	2		3	2	3	2						2		2
2023-08-05	Mirab Abaya	Delbo	3	1	0	3	0	0	1	0		2		1	5		5		2		2	2		3	2	3	2						1	1	2
2023-08-05	Mirab Abaya	Delbo	5	2	0	3	0	0	1	0		2		1	5		3		2		2	2		3	2	3	2						2		2
2023-08-05	Mirab Abaya	Delbo	6	1	2	1	1	0	0	0		2		1	5		2		2		2	1	2	4	2	4	2						2		2
2023-08-05	Mirab Abaya	Delbo	3	2	0	1	1	0	0	0		2		1	5		2		2		2	2		1	1	2	2						2		2
2023-08-05	Mirab Abaya	Delbo	6	1	5	3	0	0	1	0		2		1	5		2		2		2	2		3	2	3	1	2	1	0	0	0	2		2
2023-08-05	Mirab Abaya	Delbo	5	1	0	3	0	0	1	0		2		1	5		2		2		2	2		3	2	2	2						2		2
2023-08-05	Mirab Abaya	Delbo	7	1	0	3	0	0	1	0		2		1	1		2		2		2	2		4	4	3	1	6	0	0	0	2	1	4	2
2023-08-05	Mirab Abaya	Delbo	6	2	0	3	0	0	1	0		2		1	2		2		2		2	2		3	2	3	2						2		2
2023-08-05	Mirab Abaya	Delbo	3	2	0	3	0	0	1	0		2		1	5		3		2		2	2		3	2	3	2						2		2
2023-08-05	Mirab Abaya	Delbo	3	1	0	3	0	0	1	0		2		1	2		3		2		2	2		3	2	4	2						2		2
2023-08-05	Mirab Abaya	Delbo	6	1	0	1	1	0	0	0		2		2			5		5		2	2		1	1	1	2						1	2	2
2023-08-05	Mirab Abaya	Delbo	6	1	0	3	0	0	1	0		2		2			5		5		2	2		4	2	4	2						2		2
2023-08-05	Mirab Abaya	Delbo	1	2	0	1	1	0	0	0		2		2			5		5		2	2		3	2	3	2						2		2
2023-08-05	Mirab Abaya	Delbo	2	2	0	3	0	0	1	0		2		1	5		2		2		2	2		3	2	3	2						1	2	2
2023-08-05	Mirab Abaya	Delbo	3	2	0	1	1	0	0	0		2		1	5		2		2		2	2		1	1	1	2						2		2
2023-08-05	Mirab Abaya	Delbo	7	2	0	3	0	0	1	0		2		1	5		2		2		2	2		3	2	3	1	2	2	0	0	2	1	6	2
2023-08-05	Mirab Abaya	Delbo	4	1	3	1	1	0	0	0		2		1	5		8		8		2	2		1	1	1	2						1	1	2
2023-08-05	Mirab Abaya	Delbo	5	2	0	1	1	0	0	0		2		2			8		8		2	2		1	1	1	2						2		2
2023-08-08	Mirab Abaya	Delbo	3	2	0	3	0	0	1	0		2		2			5		5		2	2		2	2	2	2						2		2
2023-08-08	Mirab Abaya	Delbo	4	1	0	3	0	0	1	0		2		2			5		5		2	2		2	2	2	2						2		2
2023-08-08	Mirab Abaya	Delbo	6	1	4	3	0	0	1	0		2		1	4		2		2		2	2		3	2	2	2						2		2
2023-08-08	Mirab Abaya	Delbo	7	1	0	1	1	0	0	0		2		1	5		2		2		2	2		4	2	4	1	4	2	0	0	1	1	2	2
2023-08-08	Mirab Abaya	Delbo	4	1	4	1	1	0	0	0		2		1	5		2		2		2	2		1	1	1	1	4	1	0	0	1	1	1	2
2023-08-08	Mirab Abaya	Delbo	4	1	0	1	1	0	0	0		2		2			8		8		2	2		2	1	1	2						2		2
2023-08-08	Mirab Abaya	Delbo	8	1	2	1	1	0	0	0		2		2			8		8		2	2		2	2	2	2						2		2
2023-08-08	Mirab Abaya	Delbo	4	1	0	1	1	0	0	0		2		2			8		8		2	2		2	1	1	2						1	1	2
2023-08-08	Mirab Abaya	Delbo	4	2	0	1	1	0	0	0		2		1	5		2		2		2	2		2	1	2	2						2		2
2023-08-08	Mirab Abaya	Delbo	1	2	0	1	1	0	0	0		2		1	5		2		2		2	2		3	2	3	2						2		2
2023-08-08	Mirab Abaya	Delbo	5	1	2	1	1	0	0	0		2		1	5		2		2		2	2		3	2	3	2						2		2
2023-08-08	Mirab Abaya	Delbo	7	2	0	1	1	0	0	0		2		1	5		2		5		2	2		4	3	4	1	2	0	4	0	1	1	6	2
2023-08-08	Mirab Abaya	Delbo	3	2	0	1	1	0	0	0		2		1	5		5		2		2	2		1	1	1	2						1	3	2
2023-08-08	Mirab Abaya	Delbo	4	2	0	1	1	0	0	0		2		1	5		2		2		2	2		2	2	2	2						2		2
2023-08-08	Mirab Abaya	Delbo	3	1	0	1	1	0	0	0		2		1	5		5		2		2	2		1	1	1	1	2	0	0	0	1	1	2	2
2023-08-08	Mirab Abaya	Delbo	5	1	0	1	1	0	0	0		2		1	5		2		5		2	2		3	2	3	1	3	1	10	0	1	1	6	2
2023-08-09	Mirab Abaya	Delbo	3	2	0	1	1	0	0	0		2		2			8		8		2	2		1	1	1	2						2		2
2023-08-09	Mirab Abaya	Delbo	5	1	2	1	1	0	0	0		2		2			5		8		2	2		1	1	1	1	0	1	0	0	0	1	5	2
2023-08-09	Mirab Abaya	Delbo	3	1	0	1	1	0	0	0		2		2			8		5		2	2		2	1	2	2						2		2
2023-08-09	Mirab Abaya	Delbo	5	1	2	1	1	0	0	0		2		1	5		2		2		2	2		3	2	2	1	2	0	0	0	1	1	2	2
2023-08-09	Mirab Abaya	Delbo	1	1	1	1	1	0	0	0		2		1	5		5		5		2	2		3	2	2	2						2		2
2023-08-09	Mirab Abaya	Delbo	4	1	2	1	1	0	0	0		2		2			8		8		2	2		3	3	3	1	2	0	0	0	1	2		2
2023-08-09	Mirab Abaya	Delbo	7	1	1	1	1	0	0	0		2		1	5		2		2		2	2		3	2	3	1	6	0	0	0	1	1	1	2
2023-08-09	Mirab Abaya	Delbo	4	1	0	3	0	0	1	0		2		1	1		2		2		2	2		3	2	2	2						2		2
2023-08-09	Mirab Abaya	Delbo	5	1	0	1	1	0	0	0		2		1	1		2		2		2	2		2	2	3	2						2		2
2023-08-09	Mirab Abaya	Delbo	5	1	5	1	1	0	0	0		2		1	5		2		2		2	2		3	2	4	1	3	0	0	0	0	1	2	2
2023-08-09	Mirab Abaya	Delbo	2	1	2	3	0	0	1	0		2		2			5		5		2	2		3	2	2	2						2		2
2023-08-09	Mirab Abaya	Delbo	6	2	0	1	1	0	0	0		2		2			2		2		2	2		2	2	2	2						2		2
2023-08-09	Mirab Abaya	Delbo	3	1	3	1	1	0	0	0		2		1	5		2		2		2	2		2	1	2	2						2		2
2023-08-09	Mirab Abaya	Delbo	1	2	0	1	1	0	0	0		2		2			5		5		2	2		1	1	1	2						2		2
2023-08-09	Mirab Abaya	Delbo	1	2	0	1	1	0	0	0		2		2			5		5		2	2		1	1	1	2						2		2
2023-08-09	Mirab Abaya	Delbo	5	2	0	1	1	0	0	0		2		1	5		2		2		2	2		3	2	2	1	2	0	2	0	2	1	2	2
2023-08-09	Mirab Abaya	Delbo	3	2	0	1	1	0	0	0		2		1	5		5		5		2	2		2	1	2	1	0	1	0	0	0	2		2
2023-08-09	Mirab Abaya	Delbo	7	1	0	1	1	0	0	0		2		2			8		8		2	2		2	1	2	1	0	1	0	0	0	2		2
2023-08-09	Mirab Abaya	Delbo	5	2	0	1	1	0	0	0		2		2			5		5		2	2		3	2	3	1	6	0	0	0	0	1	1	2
2023-08-09	Mirab Abaya	Delbo	5	2	0	1	1	0	0	0		2		1	5		2		2		2	2		3	2	3	1	4	0	0	0	1	1	3	2
2023-08-09	Mirab Abaya	Delbo	4	2	0	1	1	0	0	0		2		1	5		2		2		2	2		3	2	2	2						1	3	2
2023-08-09	Mirab Abaya	Delbo	4	2	0	1	1	0	0	0		2		2			8		8		2	2		1	1	1	2						1	14	2
2023-08-09	Mirab Abaya	Delbo	3	1	0	1	1	0	0	0		2		1	5		2		2		2	2		4	2	4	2						2		2
2023-08-09	Mirab Abaya	Delbo	3	1	0	1	1	0	0	0		2		1	5		6		2		2	2		3	2	3	2						2		2
2023-08-09	Mirab Abaya	Delbo	5	2	0	1	1	0	0	0		2		1	5		2		2		2	2		4	2	5	2						2		2
2023-08-09	Mirab Abaya	Delbo	3	1	3	1	1	0	0	0		2		1	5		2		2		2	2		2	2	2	2						1	1	2
2023-08-09	Mirab Abaya	Delbo	4	2	0	3	0	0	1	0		2		1	3		2		5		2	2		4	2	3	2						2		2
2023-08-10	Mirab Abaya	Alge	2	1	2	1	1	0	0	0		2		2			8		1		2	2		3	2	3	2						2		2
2023-08-10	Mirab Abaya	Alge	7	1	6	1	1	0	0	0		2		2			8		8		2	2		3	2	3	2						2		2
2023-08-10	Mirab Abaya	Alge	6	1	2	1	1	0	0	0		2		2			5		5		2	2		3	2	3	1	2	0	0	0	1	1	1	2
2023-08-10	Mirab Abaya	Alge	7	1	5	1	1	0	0	0		2		2			5		5		2	2		3	2	3	1	2	0	0	0	0	1	2	2
2023-08-10	Mirab Abaya	Alge	6	1	6	1	1	0	0	0		1		2			5		1		2	2		1	1	0	2						1	4	2
2023-08-10	Mirab Abaya	Alge	9	1	7	1	1	0	0	0		2		2			8		8		2	2		3	2	3	1	0	1	0	0	0	2		2
2023-08-10	Mirab Abaya	Alge	2	1	2	1	1	0	0	0		2		2			8		8		2	2		3	2	3	2						2		2
2023-08-10	Mirab Abaya	Alge	3	1	3	1	1	0	0	0		2		2			1		8		2	2		2	1	2	2						1	4	2
2023-08-10	Mirab Abaya	Alge	6	1	5	3	0	0	1	0		2		2			5		5		2	2		3	2	3	1	2	0	6	0	0	2		2
2023-08-10	Mirab Abaya	Alge	5	1	5	1	1	0	0	0		2		2			1		5		2	2		2	2	3	2						1	1	2
2023-08-10	Mirab Abaya	Alge	6	1	0	1	1	0	0	0		2		2			2		2		2	2		1	2	2	2						2		2
2023-08-10	Mirab Abaya	Alge	6	1	4	1	1	0	0	0		1		2			1		5		1	1	1	1	1	0	2						2		2
2023-08-10	Mirab Abaya	Alge	6	1	6	1	1	0	0	0		1		2			1		5		2	2		1	1	0	1	0	0	2	0	0	2		2
2023-08-10	Mirab Abaya	Alge	7	1	3	1	1	0	0	0		2		2			8		8		2	2		2	2	1	1	0	0	3	0	0	2		2
2023-08-10	Mirab Abaya	Alge	8	1	4	3	0	0	1	0		2		2			3		5		2	2		3	2	2	2						2		2
2023-08-10	Mirab Abaya	Alge	4	1	0	1	1	0	0	0		2		2			8		8		2	2		3	2	3	2						1	4	2
2023-08-10	Mirab Abaya	Alge	6	1	3	3	0	0	1	0		2		2			8		8		2	2		3	2	3	1	0	1	3	0	0	2		2
2023-08-10	Mirab Abaya	Alge	7	1	7	3	0	0	1	0		2		1	5		5		2		2	2		2	2	3	2						1	4	2
2023-08-10	Mirab Abaya	Alge	5	1	5	3	0	0	1	0		2		2			5		5		2	2		2	2	3	1	0	0	30	0	0	2		2
2023-08-10	Mirab Abaya	Alge	7	1	5	1	1	0	0	0		2		2			5		5		2	2		3	2	3	1	0	0	4	0	0	1	4	2
2023-08-10	Mirab Abaya	Alge	6	2	0	1	1	0	0	0		2		2			5		5		1	2		2	2	2	2						1	1	2
2023-08-10	Mirab Abaya	Alge	7	1	4	1	1	0	0	0		2		2			1		8		2	2		3	2	3	2						1	5	2
2023-08-10	Mirab Abaya	Alge	5	1	1	1	1	0	0	0		2		2			8		8		2	2		3	2	3	1	5	0	1	0	3	1	5	2
2023-08-10	Mirab Abaya	Alge	3	1	0	1	1	0	0	0		2		2			1		8		2	2		4	2	4	2						2		2
2023-08-10	Mirab Abaya	Alge	8	1	0	1	1	0	0	0		1		2			8		1		2	2		1	1	0	1	3	0	4	0	2	2		2
2023-08-10	Mirab Abaya	Alge	5	1	5	1	1	0	0	0		2		2			8		8		2	2		2	1	2	1	0	0	15	0	0	1	1	2
2023-08-10	Mirab Abaya	Alge	5	2	0	1	1	0	0	0		2		2			5		5		2	2		3	2	3	2						1	5	2
2023-08-10	Mirab Abaya	Alge	4	2	0	1	1	0	0	0		2		2			1		5		2	2		3	2	3	2						1	3	2
2023-08-10	Mirab Abaya	Alge	2	1	2	1	1	0	0	0		2		2			1		5		2	2		1	1	0	2						1	2	2
2023-08-10	Mirab Abaya	Alge	9	1	0	3	0	0	1	0		2		2			5		6		2	2		2	2	3	1	5	0	12	0	0	2		2
2023-08-10	Mirab Abaya	Alge	8	2	0	1	1	0	0	0		2		2			5		5		2	2		2	2	3	2						1	3	2
2023-08-10	Mirab Abaya	Alge	3	2	0	1	1	0	0	0		1		2			1		5		1	1	1	1	1	0	2						2		2
2023-08-10	Mirab Abaya	Alge	8	2	0	3	0	0	1	0		2		2			8		8		2	2		4	4	5	1	5	0	15	0	2	2		2
2023-08-10	Mirab Abaya	Alge	5	2	0	1	1	0	0	0		2		2			1		8		2	2		3	1	3	1	0	0	5	0	0	1	4	2
2023-08-10	Mirab Abaya	Alge	3	2	0	1	1	0	0	0		1		2			1		8		2	2		1	1	0	2						2		2
2023-08-11	Mirab Abaya	Alge	4	1	0	1	1	0	0	0		2		2			5		5		2	2		2	2	2	1	0	0	20	0	0	1	5	2
2023-08-11	Mirab Abaya	Alge	6	2	0	1	1	0	0	0		2		2			1		5		2	2		2	2	3	2						2		2
2023-08-11	Mirab Abaya	Alge	8	1	0	1	1	0	0	0		2		2			1		5		2	2		1	1	2	2						1	1	2
2023-08-11	Mirab Abaya	Alge	4	1	4	1	1	0	0	0		2		2			1		5		2	2		1	1	1	2						2		2
2023-08-11	Mirab Abaya	Alge	6	1	0	1	1	0	0	0		2		2			5		5		2	2		2	2	3	2						2		2
2023-08-11	Mirab Abaya	Alge	8	1	7	1	1	0	0	0		2		2			1		8		2	2		3	2	3	1	0	0	2	0	0	2		2
2023-08-11	Mirab Abaya	Alge	11	1	1	3	0	0	1	0		2		2			4		3		2	2		3	2	3	1	0	1	0	0	0	2		2
2023-08-11	Mirab Abaya	Alge	7	1	0	3	0	0	1	0		2		2			7		7		2	2		3	2	3	1	1	0	5	0	0	1	1	2
2023-08-11	Mirab Abaya	Alge	3	1	3	1	1	0	0	0		2		2			8		1		2	2		1	1	1	2						2		2
2023-08-11	Mirab Abaya	Alge	7	1	0	3	0	0	1	0		2		2			7		7		2	2		4	3	4	1	0	0	6	0	0	1	2	2
2023-08-11	Mirab Abaya	Alge	3	1	2	1	1	0	0	0		2		2			5		5		2	2		3	2	3	1	0	0	7	0	0	1	0	2
2023-08-11	Mirab Abaya	Alge	9	1	3	1	1	0	0	0		2		2			7		7		2	2		3	2	4	1	0	1	15	0	0	2		2
2023-08-11	Mirab Abaya	Alge	6	1	6	1	1	0	0	0		2		2			8		8		2	2		3	2	3	1	3	0	1	0	1	2		2
2023-08-11	Mirab Abaya	Alge	5	1	3	1	1	0	0	0		2		2			1		8		2	2		2	1	2	1	0	0	3	0	0	2		2
2023-08-11	Mirab Abaya	Alge	3	1	3	3	0	0	1	0		2		1	5		5		2		2	2		1	1	1	2						1	2	2
2023-08-11	Mirab Abaya	Alge	4	1	3	3	0	0	1	0		2		2			5		5		2	2		2	2	3	2						2		2
2023-08-11	Mirab Abaya	Alge	6	1	3	1	1	0	0	0		2		2			1		5		2	2		1	1	2	2						1	4	2
2023-08-11	Mirab Abaya	Alge	3	1	2	1	1	0	0	0		2		2			8		8		2	2		4	2	5	2						2		2
2023-08-11	Mirab Abaya	Alge	5	1	3	1	1	0	0	0		2		2			8		8		2	2		3	2	3	2						2		2
2023-08-11	Mirab Abaya	Alge	6	1	6	3	0	0	1	0		2		1	3		7		4		2	2		4	3	3	1	0	0	3	0	0	1	1	2
2023-08-11	Mirab Abaya	Alge	7	1	4	1	1	0	0	0		2		2			5		5		2	2		3	2	3	1	8	0	10	0	0	2		2
2023-08-11	Mirab Abaya	Alge	9	1	3	1	1	0	0	0		2		2			5		5		2	2		4	2	4	1	3	0	0	0	1	1	1	2
2023-08-11	Mirab Abaya	Alge	5	1	2	1	1	0	0	0		2		2			1		8		2	2		3	2	3	1	0	0	7	0	0	2		2
2023-08-11	Mirab Abaya	Alge	5	1	0	1	1	0	0	0		2		2			1		8		2	2		3	2	3	2						2		2
2023-08-11	Mirab Abaya	Alge	2	1	2	1	1	0	0	0		1		2			1		5		1	2		1	1	0	2						1	1	2
2023-08-11	Mirab Abaya	Alge	5	1	3	1	1	0	0	0		1		2			1		5		1	2		1	1	0	2						1	1	2
2023-08-11	Mirab Abaya	Alge	5	1	5	1	1	0	0	0		2		1	5		2		2		2	2		4	3	5	2						2		2
2023-08-11	Mirab Abaya	Alge	5	1	5	1	1	0	0	0		2		2			8		8		2	2		2	2	2	2						1	1	2
2023-08-11	Mirab Abaya	Alge	2	2	0	1	1	0	0	0		2		2			8		1		2	2		3	2	3	1	3	1	0	0	0	2		2
2023-08-11	Mirab Abaya	Alge	3	1	3	1	1	0	0	0		2		2			1		5		2	2		1	1	1	2						1	2	2
2023-08-11	Mirab Abaya	Alge	3	1	0	1	1	0	0	0		2		2			5		5		2	2		2	2	3	1	1	0	10	0	0	2		2
2023-08-11	Mirab Abaya	Alge	4	1	2	3	0	0	1	0		2		1	4		5		3		2	2		2	2	2	2						1	3	2
2023-08-11	Mirab Abaya	Alge	6	1	0	1	1	0	0	0		2		2			1		5		2	2		2	2	3	2						1	1	2
2023-08-11	Mirab Abaya	Alge	5	1	3	1	1	0	0	0		2		1	5		8		5		2	2		5	2	4	1	2	0	2	0	0	1	3	2
2023-08-11	Mirab Abaya	Alge	6	1	0	1	1	0	0	0		2		2			8		1		2	2		3	2	3	2						2		2
2023-08-11	Mirab Abaya	Alge	6	1	2	1	1	0	0	0		2		2			8		1		2	2		3	2	3	1	0	0	8	0	0	1	2	2
2023-08-11	Mirab Abaya	Alge	3	1	0	1	1	0	0	0		2		1	5		5		5		2	2		3	2	3	2						2		2
2023-08-11	Mirab Abaya	Alge	2	1	2	1	1	0	0	0		1		2			1		5		2	2		1	1	0	2						2		2
2023-08-11	Mirab Abaya	Alge	4	2	0	1	1	0	0	0		2		2			5		5		2	2		3	2	3	1	2	0	0	0	0	2		2
2023-08-11	Mirab Abaya	Alge	4	1	1	1	1	0	0	0		2		2			5		5		2	2		3	2	3	1	3	0	5	0	0	1	2	2
2023-08-11	Mirab Abaya	Alge	4	1	4	3	0	0	1	0		2		2			8		3		2	2		3	2	2	2						1	2	2
2023-08-11	Mirab Abaya	Alge	7	1	1	1	1	0	0	0		1		2			1		8		2	2		1	1	0	1	0	1	2	0	0	2		2
2023-08-11	Mirab Abaya	Alge	5	1	2	1	1	0	0	0		2		2			8		8		2	2		3	2	3	1	0	0	5	0	0	2		2
2023-08-11	Mirab Abaya	Alge	3	1	3	1	1	0	0	0		2		1	5		8		8		2	2		1	1	1	1	2	1	0	0	1	2		2
2023-08-11	Mirab Abaya	Alge	3	2	0	3	0	0	1	0		2		2			1		1		2	2		2	2	2	2						2		2
2023-08-11	Mirab Abaya	Alge	5	1	2	1	1	0	0	0		2		2			8		8		2	2		3	1	2	1	3	0	9	0	0	2		2
2023-08-11	Mirab Abaya	Alge	4	2	0	1	1	0	0	0		2		2			8		8		2	2		3	2	3	1	0	1	3	0	0	1	4	2
2023-08-11	Mirab Abaya	Alge	3	1	3	1	1	0	0	0		2		2			1		8		2	2		2	2	1	1	2	0	1	0	1	1	1	2
2023-08-11	Mirab Abaya	Alge	2	1	0	1	1	0	0	0		2		2			1		8		2	2		1	1	1	2						2		2
2023-08-12	Mirab Abaya	Alge	8	1	0	1	1	0	0	0		2		2			5		5		2	2		2	2	3	2						1	4	2
2023-08-12	Mirab Abaya	Alge	7	1	0	1	1	0	0	0		2		2			1		5		1	2		2	2	3	2						1	5	2
2023-08-12	Mirab Abaya	Alge	8	1	7	1	1	0	0	0		2		2			8		8		2	2		3	2	3	1	0	1	4	0	0	2		2
2023-08-12	Mirab Abaya	Alge	7	1	6	1	1	0	0	0		2		2			8		8		2	2		2	1	2	2						2		2
2023-08-12	Mirab Abaya	Alge	7	2	0	1	1	0	0	0		2		2			8		8		2	2		3	2	4	2						2		2
2023-08-12	Mirab Abaya	Alge	5	2	0	1	1	0	0	0		2		2			1		8		2	2		3	2	3	2						2		2
2023-08-12	Mirab Abaya	Alge	1	1	1	1	1	0	0	0		2		2			8		8		2	2		1	1	1	2						2		2
2023-08-12	Mirab Abaya	Alge	7	1	4	1	1	0	0	0		2		2			8		8		2	2		3	2	3	2						1	1	2
2023-08-12	Mirab Abaya	Alge	5	1	4	1	1	0	0	0		2		2			8		8		2	2		2	1	2	1	2	0	3	0	1	1	2	2
2023-08-12	Mirab Abaya	Alge	2	1	2	1	1	0	0	0		2		2			8		8		2	2		5	5	5	2						1	2	2
2023-08-12	Mirab Abaya	Alge	6	1	4	3	0	0	1	0		2		1	3		7		4		2	2		4	2	7	2						2		2
2023-08-12	Mirab Abaya	Alge	1	1	0	1	1	0	0	0		1		2			1		1		1	1	12345	1	1	0	2						2		2
2023-08-12	Mirab Abaya	Alge	4	1	4	1	1	0	0	0		1		2			1		5		1	2		1	1	0	1	3	0	0	0	0	2		2
2023-08-12	Mirab Abaya	Alge	3	1	3	1	1	0	0	0		2		2			5		5		2	2		3	3	5	2						2		2
2023-08-12	Mirab Abaya	Alge	6	1	0	3	0	0	1	0		2		2			7		7		2	2		5	2	7	1	0	0	7	0	0	2		2
2023-08-12	Mirab Abaya	Alge	8	1	6	1	1	0	0	0		2		2			8		8		2	2		3	2	3	1	0	0	7	0	0	1	3	2
2023-08-12	Mirab Abaya	Alge	6	1	0	2	0	1	0	0		2		1	3		4		4		2	2		3	2	4	1	0	0	5	0	0	1	2	2
2023-08-12	Mirab Abaya	Alge	7	2	0	1	1	0	0	0		2		2			1		8		2	2		3	2	3	2						1	1	2
2023-08-12	Mirab Abaya	Alge	6	1	6	3	0	0	1	0		2		2			5		5		2	2		3	2	3	2						1	2	2
2023-08-12	Mirab Abaya	Alge	5	1	4	1	1	0	0	0		2		2			8		8		2	2		3	2	3	2						1	4	2
2023-08-12	Mirab Abaya	Alge	8	1	3	1	1	0	0	0		2		2			8		8		2	2		2	2	2	2						2		2
2023-08-12	Mirab Abaya	Alge	5	1	5	3	0	0	1	0		2		2			2		2		2	2		3	2	3	2						2		2
2023-08-12	Mirab Abaya	Alge	4	1	4	1	1	0	0	0		2		2			5		5		2	2		1	1	2	2						2		2
2023-08-12	Mirab Abaya	Alge	5	2	0	3	0	0	1	0		2		2			5		5		2	2		1	1	1	2						2		2
2023-08-12	Mirab Abaya	Alge	4	1	1	1	1	0	0	0		2		2			8		8		2	2		2	2	3	2						1	1	2
2023-08-12	Mirab Abaya	Alge	4	1	0	3	0	0	1	0		2		2			5		2		2	2		3	3	3	1	1	0	0	0	2	1	1	2
2023-08-12	Mirab Abaya	Alge	5	1	4	3	0	0	1	0		2		2			8		8		2	2		3	2	3	1	0	0	2	0	0	1	2	2
2023-08-12	Mirab Abaya	Alge	2	1	0	3	0	0	1	0		2		2			5		5		2	2		2	1	1	2						2		2
2023-08-17	Mirab Abaya	Delbo	4	1	0	3	0	0	1	0		2		1	3		3		2		2	2		3	2	3	2						1	8	2
2023-08-17	Mirab Abaya	Delbo	6	1	4	1	1	0	0	0		2		1	5		5		2		2	2		3	2	4	2						1	3	2
2023-08-17	Mirab Abaya	Delbo	4	2	0	3	0	0	1	0		2		1	5		2		2		2	2		3	2	3	1	10	1	10	0	2	1	11	2
2023-08-17	Mirab Abaya	Delbo	3	2	0	3	0	0	1	0		2		1	3		3		3		2	2		3	2	3	2						2		2
2023-08-17	Mirab Abaya	Delbo	2	1	1	3	0	0	1	0		2		1	5		2		2		2	2		3	2	3	1	2	0	0	0	1	2		2
2023-08-17	Mirab Abaya	Delbo	4	2	0	1	1	0	0	0		2		1	5		2		2		2	2		3	2	2	2						2		2
2023-08-17	Mirab Abaya	Delbo	4	2	0	1	1	0	0	0		2		2			5		5		2	2		1	1	1	2						2		2
2023-08-17	Mirab Abaya	Delbo	3	2	0	3	0	0	1	0		2		1	5		2		2		2	2		4	2	3	2						2		2
2023-08-17	Mirab Abaya	Delbo	3	1	0	1	1	0	0	0		2		1	5		2		2		2	2		3	2	3	1	2	0	0	0	1	1	3	2
2023-08-17	Mirab Abaya	Delbo	3	2	0	1	1	0	0	0		2		1	5		2		2		2	2		1	1	1	2						2		2
2023-08-17	Mirab Abaya	Delbo	4	2	0	1	1	0	0	0		2		2			8		8		2	2		3	2	3	2						2		2
2023-08-17	Mirab Abaya	Delbo	7	1	0	3	0	0	1	0		2		1	5		2		2		2	2		3	2	3	1	1	0	0	0	1	2		2
2023-08-17	Mirab Abaya	Delbo	5	1	0	1	1	0	0	0		2		2			8		8		2	2		3	2	3	1	1	0	0	0	1	2		2
2023-08-17	Mirab Abaya	Delbo	8	2	0	3	0	0	1	0		2		1	3		7		3		2	2		4	2	2	1	1	0	0	0	0	1	4	2
2023-08-17	Mirab Abaya	Delbo	3	2	0	3	0	0	1	0		2		1	3		3		2		2	2		3	3	3	2						2		2
2023-08-17	Mirab Abaya	Delbo	4	2	0	1	1	0	0	0		2		1	5		2		2		2	2		3	2	3	2						1	7	2
2023-08-17	Mirab Abaya	Delbo	6	1	5	1	1	0	0	0		2		1	5		2		2		2	2		3	2	4	2						2		2
2023-08-17	Mirab Abaya	Delbo	3	1	0	1	1	0	0	0		2		1	5		2		2		2	2		2	1	2	2						2		2
2023-08-17	Mirab Abaya	Delbo	7	1	1	3	0	0	1	0		2		1	5		3		2		2	2		4	2	3	2						1	5	2
2023-08-17	Mirab Abaya	Delbo	4	1	0	1	1	0	0	0		2		1	5		2		2		2	2		3	2	3	2						2		2
2023-08-17	Mirab Abaya	Delbo	7	1	5	1	1	0	0	0		2		2			5		5		2	2		3	2	3	2						1	2	2
2023-08-17	Mirab Abaya	Delbo	7	2	0	1	1	0	0	0		2		1	5		2		2		2	2		3	2	3	2						1	2	2
2023-08-17	Mirab Abaya	Delbo	6	2	0	1	1	0	0	0		2		2			5		5		2	2		2	1	2	2						2		2
2023-08-17	Mirab Abaya	Delbo	9	2	0	3	0	0	1	0		2		2			1		5		2	2		4	3	3	1	0	0	10	0	0	1	3	2
2023-08-17	Mirab Abaya	Delbo	2	2	0	3	0	0	1	0		2		1	5		2		2		2	2		3	2	3	1	0	1	0	0	0	1	4	2
2023-08-17	Mirab Abaya	Delbo	6	2	0	1	1	0	0	0		2		1	5		2		2		2	2		3	2	3	1	0	0	0	0	1	2		2
2023-08-17	Mirab Abaya	Delbo	7	1	0	1	1	0	0	0		2		2			8		8		2	2		3	2	3	1	2	0	4	0	2	1	2	2
2023-08-17	Mirab Abaya	Delbo	7	2	0	1	1	0	0	0		2		2			8		8		2	2		3	2	3	1	2	0	7	0	0	2		2
2023-08-17	Mirab Abaya	Delbo	7	2	0	1	1	0	0	0		2		2			5		5		2	2		3	2	3	1	2	0	0	0	1	1	3	2
2023-08-17	Mirab Abaya	Delbo	5	2	0	1	1	0	0	0		2		1	5		2		2		2	2		2	2	3	1	1	0	2	0	0	1	9	2
2023-08-17	Mirab Abaya	Delbo	8	2	0	1	1	0	0	0		2		2			2		2		2	2		3	2	3	2						2		2
2023-08-17	Mirab Abaya	Delbo	6	2	0	1	1	0	0	0		2		2			5		5		2	2		3	2	3	2						2		2
2023-08-17	Mirab Abaya	Delbo	3	2	0	1	1	0	0	0		2		1	5		5		2		2	2		3	2	3	2						2		2
2023-08-18	Mirab Abaya	Delbo	5	1	1	1	1	0	0	0		2		2			5		5		2	2		2	1	2	1	0	0	10	0	0	2		2
2023-08-18	Mirab Abaya	Delbo	7	1	5	1	1	0	0	0		2		2			5		5		2	2		3	2	3	2						2		2
2023-08-18	Mirab Abaya	Delbo	7	1	6	1	1	0	0	0		2		2			5		5		2	2		3	2	3	1	1	0	2	0	0	2		2
2023-08-18	Mirab Abaya	Delbo	1	2	0	1	1	0	0	0		2		1	5		2		2		2	2		2	2	1	1	0	0	5	0	0	2		2
2023-08-18	Mirab Abaya	Delbo	4	2	0	1	1	0	0	0		2		1	5		2		2		2	2		2	1	2	2						1	2	2
2023-08-18	Mirab Abaya	Delbo	5	2	0	1	1	0	0	0		2		2			8		8		2	2		2	1	2	2						2		2
2023-08-18	Mirab Abaya	Delbo	9	1	0	1	1	0	0	0		2		1	5		2		2		2	2		3	2	3	1	0	0	7	0	0	1	8	2
2023-08-18	Mirab Abaya	Delbo	6	2	0	1	1	0	0	0		2		2			1		8		2	2		2	2	2	1	0	1	0	0	0	2		2
2023-08-18	Mirab Abaya	Delbo	7	2	0	1	1	0	0	0		2		2			5		5		2	2		3	2	3	1	0	0	2	0	0	1	3	2
2023-08-18	Mirab Abaya	Delbo	8	2	0	1	1	0	0	0		2		2			8		8		2	2		2	2	2	2						2		2
2023-08-18	Mirab Abaya	Delbo	1	1	0	3	0	0	1	0		2		2			5		5		2	2		1	1	1	2						2		2
2023-08-18	Mirab Abaya	Delbo	7	1	7	1	1	0	0	0		2		1	5		2		2		2	2		4	3	4	2						1	2	2
2023-08-18	Mirab Abaya	Delbo	6	2	0	1	1	0	0	0		2		1	5		8		8		2	2		1	1	1	2						2		2
2023-08-18	Mirab Abaya	Delbo	5	1	0	1	1	0	0	0		2		1	5		2		2		2	2		3	2	3	1	0	0	4	0	0	1	2	2
2023-08-18	Mirab Abaya	Delbo	7	2	0	1	1	0	0	0		2		2			8		8		2	2		3	2	3	1	0	2	6	0	0	1	6	2
2023-08-18	Mirab Abaya	Delbo	3	2	0	1	1	0	0	0		2		1	5		2		2		2	2		3	2	3	1	0	0	10	0	0	1	1	2
2023-08-18	Mirab Abaya	Delbo	3	1	2	1	1	0	0	0		2		1	5		2		2		2	2		3	2	3	1	0	0	3	0	0	2		2
2023-08-17	Mirab Abaya	Delbo	2	1	2	1	1	0	0	0		2		2			5		5		2	2		1	1	1	2						2		2
2023-08-18	Mirab Abaya	Delbo	3	1	0	1	1	0	0	0		2		1	5		5		2		2	2		1	1	1	2						2		2
2023-08-20	Mirab Abaya	Alge	6	1	0	3	0	0	1	0		2		2			7		7		2	2		2	2	2	2						2		2
2023-08-21	Mirab Abaya	Alge	5	2	0	1	1	0	0	0		2		2			5		5		2	2		2	2	3	2						1	2	2
2023-08-21	Arba Minch zuria	Lante	4	1	4	3	0	0	1	0		2		2			5		5		2	2		2	2	2	1	4	0	1	0	1	1	2	2
2023-08-21	Arba Minch zuria	Lante	4	1	0	1	1	0	0	0		2		2			5		5		2	2		2	1	2	1	1	0	0	0	0	1	4	2
2023-08-21	Arba Minch zuria	Lante	5	1	1	1	1	0	0	0		2		2			8		8		2	2		2	1	2	2						1	4	2
2023-08-21	Arba Minch zuria	Lante	5	1	5	1	1	0	0	0		2		2			2		2		2	2		3	2	3	2						2		2
2023-08-21	Arba Minch zuria	Lante	4	1	4	1	1	0	0	0		2		2			2		2		2	2		2	1	2	2						1	6	1	2
2023-08-21	Arba Minch zuria	Lante	3	1	3	3	0	0	1	0		2		2			2		2		2	2		1	1	1	2						2		1	2
2023-08-21	Arba Minch zuria	Lante	4	1	4	1	1	0	0	0		3	Muzi wsite	2			9	Bezwriyau muzi ale	9	Be muzi koba	1	1	10	1	3	1	2						2		1	2
2023-08-21	Arba Minch zuria	Lante	4	1	4	1	1	0	0	0		3	Muzi wsite	2			9	Bezurireyaw muzi ale	9	Yemuzi koba	1	1	10	1	3	0	2						2		2
2023-08-21	Arba Minch zuria	Lante	5	1	5	1	1	0	0	0		2		2			1		1		1	1	10	1	2	3	2						2		2
2023-08-21	Mirab Abaya	Mole	7	1	0	3	0	0	1	0		2		2			2		2		2	2		3	2	3	2						1	4	2
2023-08-21	Mirab Abaya	Mole	4	1	4	1	1	0	0	0		2		1	5		5		5		2	2		2	2	2	2						2		2
2023-08-21	Arba Minch zuria	Lante	9	1	9	1	1	0	0	0		2		2			2		2		1	2		2	2	2	1	3	0	1	0	0	1	7	1	2
2023-08-21	Arba Minch zuria	Lante	5	1	2	3	0	0	1	0		2		2			2		2		1	2		2	2	3	1	2	0	0	0	0	1	4	1	1
2023-08-20	Mirab Abaya	Delbo	2	2	0	1	1	0	0	0		2		1	5		2		2		2	2		3	2	3	2						2		2
2023-08-21	Mirab Abaya	Delbo	8	2	0	1	1	0	0	0		2		1	5		8		2		2	2		3	2	2	2						2		2
2023-08-21	Mirab Abaya	Delbo	7	2	0	1	1	0	0	0		2		2			8		8		2	2		3	2	3	2						2		2
2023-08-21	Mirab Abaya	Mole	5	2	0	1	1	0	0	0		2		1	5		8		8		2	2		1	1	0	1	1	0	1	0	1	2		2
2023-08-21	Mirab Abaya	Mole	5	2	0	1	1	0	0	0		2		2			8		8		2	2		3	2	3	2						2		2
2023-08-21	Mirab Abaya	Mole	2	1	0	1	1	0	0	0		2		2			8		8		2	2		3	2	3	2						1	6	2
2023-08-21	Mirab Abaya	Mole	5	1	2	3	0	0	1	0		2		2			2		2		2	2		2	1	1	2						1	1	2
2023-08-21	Mirab Abaya	Mole	4	1	0	3	0	0	1	0		2		2			8		8		2	2		2	1	2	2						1	1	2
2023-08-21	Mirab Abaya	Mole	4	2	0	3	0	0	1	0		2		2			8		8		2	2		1	1	1	2						1	1	2
2023-08-21	Mirab Abaya	Mole	4	1	4	1	1	0	0	0		2		2			1		8		2	2		2	1	2	1	0	0	2	0	0	1	4	2
2023-08-21	Arba Minch zuria	Lante	7	1	7	1	1	0	0	0		2		2			2		2		2	1	1	2	1	2	1	1	0	0	0	0	2		2
2023-08-21	Mirab Abaya	Mole	6	1	6	3	0	0	1	0		2		2			5		5		2	2		2	1	3	2						2		2
2023-08-21	Mirab Abaya	Mole	3	1	0	3	0	0	1	0		2		1	5		5		5		2	2		1	1	1	2						2		2
2023-08-21	Mirab Abaya	Mole	8	2	0	1 3	1	0	1	0		2		1	5		5		5		2	2		5	4	4	2						1	7	2
2023-08-22	Arba Minch zuria	Lante	6	1	5	1	1	0	0	0		2		2			2		2		2	2		1	1	1	2						2		2
2023-08-22	Arba Minch zuria	Lante	5	1	5	3	0	0	1	0		2		2			2		2		2	1	2	2	2	3	2						1	4	2
2023-08-22	Arba Minch zuria	Lante	2	1	0	3	0	0	1	0		2		2			2		2		2	2		1	1	1	2						2		2
2023-08-21	Arba Minch zuria	Lante	6	1	4	1	1	0	0	0		2		2			8		5		2	2		4	3	3	1	1	1	0	0	1	1	2	2
2023-08-22	Arba Minch zuria	Lante	5	1	4	1	1	0	0	0		3	Wchi mert layi	2			2		2		1	1	5	1	1	1	2						2		2
2023-08-22	Arba Minch zuria	Lante	7	1	5	1	1	0	0	0		2		2			1		1		1	2		2	1	2	1	1	0	0	0	0	1	1	2
2023-08-22	Arba Minch zuria	Lante	5	1	5	3	0	0	1	0		2		2			5		5		2	2		2	1	1	1	2	0	0	0	0	1	1	2
2023-08-22	Arba Minch zuria	Lante	6	1	6	1	1	0	0	0		2		2			5		5		2	2		2	1	1	1	3	1	3	0	0	1	5	1	2
2023-08-22	Arba Minch zuria	Lante	2	1	0	1	1	0	0	0		2		2			5		5		2	2		2	1	2	1	1	1	0	0	0	2		2
2023-08-22	Arba Minch zuria	Lante	3	1	0	3	0	0	1	0		2		2			2		2		2	2		1	1	1	2						2		2
2023-08-21	Mirab Abaya	Mole	7	2	0	1	1	0	0	0		2		1	5		5		5		2	2		3	2	3	2						2		2
2023-08-21	Mirab Abaya	Mole	4	1	3	1	1	0	0	0		2		1	5		8		5		2	2		3	2	3	2						1	2	2
2023-08-21	Mirab Abaya	Mole	9	1	0	3	0	0	1	0		2		1	1		4		3		2	2		3	2	2	1	0	0	5	0	0	2		2
2023-08-21	Mirab Abaya	Mole	6	1	2	1	1	0	0	0		2		1	5		2		2		2	2		3	2	3	1	0	1	0	0	0	1	1	2
2023-08-21	Mirab Abaya	Mole	6	1	1	1	1	0	0	0		2		1	5		2		2		2	2		5	2	5	2						1	1	2
2023-08-21	Mirab Abaya	Mole	7	1	7	1	1	0	0	0		2		1	5		8		8		2	2		1	1	1	2						2		2
2023-08-21	Mirab Abaya	Mole	7	2	0	3	0	0	1	0		2		2			5		5		2	2		3	2	3	1	0	1	2	0	0	2		2
2023-08-22	Mirab Abaya	Mole	6	2	0	3	0	0	1	0		2		2			5		5		2	2		3	2	3	2						2		2
2023-08-21	Mirab Abaya	Mole	7	2	0	3	0	0	1	0		2		2			5		5		2	2		3	2	2	2						2		2
2023-08-22	Mirab Abaya	Mole	5	1	0	1	1	0	0	0		2		1	5		5		2		2	2		2	2	2	2						1	2	2
2023-08-22	Mirab Abaya	Mole	6	1	0	3	0	0	1	0		2		1	3		2		2		2	2		3	2	2	2						2		2
2023-08-22	Mirab Abaya	Mole	5	1	2	1	1	0	0	0		2		1	5		2		2		2	2		4	4	3	1	1	1	0	0	0	1	3	2
2023-08-22	Mirab Abaya	Mole	3	1	0	1	1	0	0	0		2		1	5		5		5		2	2		1	2	2	2						2		2
2023-08-22	Mirab Abaya	Mole	3	1	2	1	1	0	0	0		2		1	5		8		8		2	2		2	1	1	2						2		2
2023-08-22	Mirab Abaya	Mole	5	1	0	1	1	0	0	0		2		1	5		8		8		2	2		2	2	2	2						1	7	2
2023-08-22	Mirab Abaya	Mole	3	1	3	1	1	0	0	0		2		1	5		5		5		2	2		1	1	1	2						2		2
2023-08-22	Mirab Abaya	Mole	4	1	0	1	1	0	0	0		2		1	5		5		2		2	2		1	2	1	2						2		2
2023-08-22	Mirab Abaya	Mole	5	1	0	1	1	0	0	0		2		1	5		8		8		2	2		2	2	1	2						1	2	2
2023-08-22	Mirab Abaya	Mole	5	1	0	1	1	0	0	0		2		1	5		5		5		2	2		1	1	1	2						2		2
2023-08-22	Mirab Abaya	Mole	4	1	0	1	1	0	0	0		2		1	5		8		8		2	2		1	1	1	2						2		2
2023-08-21	Mirab Abaya	Mole	7	1	0	3	0	0	1	0		2		2			5		5		2	2		4	2	3	2						2		2
2023-08-21	Mirab Abaya	Mole	4	1	3	1	1	0	0	0		2		2			8		8		1	2		1	1	1	2						1	4	2
2023-08-21	Mirab Abaya	Mole	9	2	0	3	0	0	1	0		2		2			8		8		2	2		3	3	2	2						1	3	2
2023-08-21	Mirab Abaya	Mole	2	2	0	3	0	0	1	0		2		2			1		1		1	1	2	2	2	2	2						2		2
2023-08-22	Mirab Abaya	Mole	4	1	3	1	1	0	0	0		2		1	5		5		5		2	2		2	2	2	2						1	1	2
2023-08-22	Mirab Abaya	Mole	5	1	0	3	0	0	1	0		2		2			8		8		2	2		3	3	3	1	1	0	0	0	1	2		2
2023-08-22	Mirab Abaya	Mole	3	1	3	1	1	0	0	0		2		2			8		8		2	2		2	1	2	2						2		2
2023-08-22	Mirab Abaya	Mole	8	1	0	1	1	0	0	0		2		1	5		8		8		2	2		3	2	2	2						2		2
2023-08-22	Mirab Abaya	Mole	3	1	2	1	1	0	0	0		2		2			1		8		1	2		1	1	1	2						2		2
2023-08-22	Mirab Abaya	Mole	4	1	2	1	1	0	0	0		2		1	5		1		8		2	2		1	1	1	2						2		2
2023-08-22	Mirab Abaya	Mole	4	1	2	1	1	0	0	0		2		2			5		5		2	2		2	2	2	2						2		2
2023-08-22	Mirab Abaya	Mole	6	2	0	1	1	0	0	0		2		1	5		8		8		2	2		1	1	1	2						2		2
2023-08-22	Mirab Abaya	Mole	5	1	3	1	1	0	0	0		2		1	5		5		5		2	2		2	2	2	2						2		2
2023-08-22	Arba Minch zuria	Lante	5	1	5	3	0	0	1	0		2		1	5		3		5		2	2		3	2	4	2						2		2
2023-08-22	Arba Minch zuria	Lante	6	1	6	3	0	0	1	0		2		1	3		5		5		2	2		2	1	2	2						1	3	1	2
2023-08-22	Arba Minch zuria	Lante	4	1	3	3	0	0	1	0		2		2			5		5		2	2		2	2	3	2						1	2	2
2023-08-22	Arba Minch zuria	Lante	5	1	5	3	0	0	1	0		2		2			3		2		2	2		3	3	3	2						1	7	1	1
2023-08-22	Arba Minch zuria	Lante	3	1	3	3	0	0	1	0		2		2			2		2		2	2		3	3	4	2						2		1	2
2023-08-22	Arba Minch zuria	Lante	4	1	4	3	0	0	1	0		2		1	5		2		2		2	2		3	2	3	2						1	5	2
2023-08-22	Arba Minch zuria	Lante	2	1	2	3	0	0	1	0		2		2			2		2		2	2		1	1	1	2						2		1	2
2023-08-22	Arba Minch zuria	Lante	5	1	4	2	0	1	0	0		2		1	3		2		3		2	2		2	3	2	2						2		1	1
2023-08-22	Arba Minch zuria	Lante	2	1	2	1	1	0	0	0		1		2			1		9	Madaberya	1	1	5	1	1	0	2						2		1	2
2023-08-22	Arba Minch zuria	Lante	1	1	1	1	1	0	0	0		1		1	5		5		5		2	2		2	1	2	2						2		2
2023-08-22	Arba Minch zuria	Lante	4	1	4	1	1	0	0	0		2		2			2		2		2	2		3	1	2	2						2		2
2023-08-22	Arba Minch zuria	Lante	1	1	1	1	1	0	0	0		2		2			2		2		2	2		2	1	2	2						2		1	2
2023-08-22	Arba Minch zuria	Lante	3	1	1	1	1	0	0	0		2		1	5		3		3		2	2		3	2	2	2						1	3	2
2023-08-22	Arba Minch zuria	Lante	3	1	3	1	1	0	0	0		2		1	5		5		5		2	2		2	1	2	2						2		2
2023-08-22	Arba Minch zuria	Lante	3	1	0	1	1	0	0	0		2		2			5		8		2	2		1	1	1	2						2		2
2023-08-22	Arba Minch zuria	Lante	7	1	4	3	0	0	1	0		2		1	5		2		2		2	2		1	1	2	2						2		2
2023-08-22	Arba Minch zuria	Lante	3	1	3	3	0	0	1	0		2		2			6		6		2	2		2	2	3	2						2		2
2023-08-22	Arba Minch zuria	Lante	6	1	5	3	0	0	1	0		2		1	3		2		2		2	2		2	2	2	1	2	1	0	1	0	1	4	2
2023-08-22	Arba Minch zuria	Lante	15	1	7	1	1	0	0	0		2		2			2		2		2	2		5	2	4	1	4	0	1	2	0	1	10	2
2023-08-22	Mirab Abaya	Mole	4	1	0	1	1	0	0	0		2		1	5		5		5		2	2		1	1	2	2						2		2
2023-08-22	Mirab Abaya	Mole	5	1	0	3	0	0	1	0		2		2			8		8		2	2		3	2	3	2						2		2
2023-08-22	Mirab Abaya	Mole	6	1	2	1	1	0	0	0		2		1	5		8		8		2	2		2	2	2	2						2		2
2023-08-22	Mirab Abaya	Mole	5	1	2	1	1	0	0	0		2		1	5		2		2		2	2		2	1	2	2						2		2
2023-08-22	Mirab Abaya	Mole	5	2	0	1	1	0	0	0		2		2			8		8		2	2		2	2	2	2						2		2
2023-08-22	Mirab Abaya	Mole	6	2	0	1	1	0	0	0		2		1	5		2		2		2	2		2	1	2	2						2		2
2023-08-22	Arba Minch zuria	Lante	4	1	2	3	0	0	1	0		2		2			5		5		2	2		2	2	2	1	1	1	0	0	0	1	3	2
2023-08-22	Arba Minch zuria	Lante	9	1	6	3	0	0	1	0		2		2			5		5		2	2		3	2	3	1	1	0	6	0	0	1	10	2
2023-08-22	Arba Minch zuria	Lante	3	1	0	3	0	0	1	0		2		1	5		5		5		2	2		1	1	1	2						1	1	2
2023-08-22	Arba Minch zuria	Lante	3	1	0	3	0	0	1	0		2		2			5		5		2	2		1	1	1	2						2		2
2023-08-23	Arba Minch zuria	Lante	3	1	2	1	1	0	0	0		2		2			5		5		2	2		3	2	3	1	2	1	0	0	0	1	6	2
2023-08-23	Arba Minch zuria	Lante	5	1	3	3	0	0	1	0		2		2			5		5		2	2		3	2	3	1	3	0	1	0	0	1	4	2
2023-08-23	Arba Minch zuria	Lante	2	1	2	3	0	0	1	0		2		2			5		5		2	2		3	2	3	2						2		2
2023-08-23	Arba Minch zuria	Lante	3	1	2	3	0	0	1	0		2		2			2		2		2	2		3	2	3	1	0	0	0	0	0	1	3	2
2023-08-23	Arba Minch zuria	Lante	5	1	5	1	1	0	0	0		2		2			5		5		2	2		2	1	2	2						1	2	2
2023-08-23	Arba Minch zuria	Lante	2	1	1	3	0	0	1	0		2		1	5		2		2		1	1	1	4	3	3	2						1	4	1	2
2023-08-23	Arba Minch zuria	Lante	3	2	0	4	0	0	0	1	Ayitekemwm	3	Yelem	2			2		2		2	2		3	2	4	2						2		1	2
2023-08-23	Arba Minch zuria	Lante	2	1	2	4	0	0	0	1	Keseli manideja	3	Wchi	1	5		2		2		2	2		2	1	2	2						2		2
2023-08-23	Arba Minch zuria	Lante	7	1	2	1	1	0	0	0		2		1	5		2		2		2	2		1	1	2	2						2		1	2
2023-08-23	Arba Minch zuria	Lante	5	1	5	3	0	0	1	0		2		2			2		2		2	2		3	3	4	2						2		2
2023-08-23	Arba Minch zuria	Lante	4	1	4	3	0	0	1	0		2		1	5		2		2		2	2		1	1	2	2						2		2
2023-08-23	Arba Minch zuria	Lante	4	1	4	3	0	0	1	0		2		2			2		2		2	2		3	1	3	2						1	5	1	2
2023-08-23	Arba Minch zuria	Lante	6	1	6	3	0	0	1	0		2		2			2		2		2	2		2	2	3	2						1	4	2
2023-08-23	Arba Minch zuria	Lante	1	1	0	4	0	0	0	1	Beti wsite yitekemalu	2		1	5		2		2		2	2		2	1	2	2						2		2
2023-08-23	Arba Minch zuria	Lante	4	1	4	3	0	0	1	0		2		1	5		2		2		2	2		2	1	2	2						1	4	2
2023-08-23	Arba Minch zuria	Lante	4	1	4	1	1	0	0	0		3	Sera	2			2		2		2	2		2	1	2	2						2		2
2023-08-23	Arba Minch zuria	Lante	4	1	3	1	1	0	0	0		2		2			2		2		1	1	2	4	2	4	2						1	2	2
2023-08-22	Arba Minch zuria	Lante	5	1	5	3	0	0	1	0		2		1	5		2		2		2	2		2	2	2	2						1	10	2
2023-08-23	Arba Minch zuria	Lante	8	1	2	3	0	0	1	0		2		1	5		2		2		2	2		2	2	3	1	0	0	0	4	0	1	9	1	2
2023-08-23	Arba Minch zuria	Lante	3	1	2	3	0	0	1	0		2		2			2		2		1	2		4	2	5	2						1	2	1	2
2023-08-23	Arba Minch zuria	Lante	3	1	3	3	0	0	1	0		2		1	5		2		2		2	2		1	1	2	2						2		2
2023-08-23	Arba Minch zuria	Lante	8	1	4	1	1	0	0	0		2		1	2		2		2		2	2		6	4	6	2						2		1	2
2023-08-23	Arba Minch zuria	Lante	5	1	4	1	1	0	0	0		2		2			5		5		2	2		3	2	4	2						1	7	2
2023-08-23	Arba Minch zuria	Lante	2	1	1	3	0	0	1	0		2		1	3		2		2		2	2		2	2	2	2						2		2
2023-08-23	Arba Minch zuria	Lante	4	1	3	3	0	0	1	0		2		1	1		2		2		2	2		2	1	2	2						2		2
2023-08-24	Arba Minch zuria	Lante	4	1	3	3	0	0	1	0		2		2			5		5		2	2		1	1	1	2						2		2
2023-08-23	Mirab Abaya	Mole	5	1	4	3	0	0	1	0		2		1	5		5		2		2	2		3	2	3	2						1	2	2
2023-08-23	Mirab Abaya	Mole	4	1	0	3	0	0	1	0		2		2			5		5		2	2		2	2	2	2						2		2
2023-08-23	Mirab Abaya	Mole	9	1	1	3	0	0	1	0		2		1	3		3		2		2	2		4	3	3	1	3	0	0	0	1	2		2
2023-08-23	Mirab Abaya	Mole	2	1	2	1	1	0	0	0		2		1	5		5		2		2	2		1	1	2	2						1	1	2
2023-08-23	Mirab Abaya	Mole	3	1	0	3	0	0	1	0		2		1	5		2		2		2	2		3	2	1	2						1	4	2
2023-08-23	Mirab Abaya	Mole	7	2	0	3	0	0	1	0		2		2			5		5		2	2		2	2	3	1	0	1	0	0	0	2		2
2023-08-24	Mirab Abaya	Mole	4	1	0	1	1	0	0	0		2		1	5		5		5		2	2		3	2	2	2						2		2
2023-08-23	Mirab Abaya	Mole	7	1	0	3	0	0	1	0		2		1	5		5		2		2	2		2	2	2	2						2		2
2023-08-23	Mirab Abaya	Mole	3	1	0	1	1	0	0	0		2		2			8		8		2	2		2	1	2	2						1	5	2
2023-08-23	Mirab Abaya	Mole	5	1	0	1	1	0	0	0		2		2			8		8		2	2		3	2	2	1	1	0	0	0	0	2		2
2023-08-23	Mirab Abaya	Mole	3	2	0	3	0	0	1	0		2		2			8		8		2	2		1	1	1	2						2		2
2023-08-23	Mirab Abaya	Mole	6	1	0	1	1	0	0	0		2		2			5		5		2	2		2	1	2	1	1	0	0	0	0	2		2
2023-08-23	Mirab Abaya	Mole	2	2	0	1	1	0	0	0		2		2			1		8		2	2		2	1	1	2						2		2
2023-08-23	Mirab Abaya	Mole	3	1	2	3	0	0	1	0		2		1	5		5		2		2	2		2	2	2	2						2		2
2023-08-23	Mirab Abaya	Mole	4	1	0	1	1	0	0	0		2		2			8		8		2	2		2	1	2	2						1	2	2
2023-08-24	Mirab Abaya	Mole	3	1	0	1	1	0	0	0		2		1	5		8		1		2	2		2	1	2	2						2		2
2023-08-24	Mirab Abaya	Mole	4	2	0	1	1	0	0	0		2		2			8		8		2	2		3	2	2	2						2		2
2023-08-23	Mirab Abaya	Mole	3	1	3	1	1	0	0	0		2		1	5		5		5		2	2		3	2	3	2						1	2	2
2023-08-23	Mirab Abaya	Mole	3	1	3	1	1	0	0	0		2		1	5		8		8		2	2		3	2	3	2						2		2
2023-08-23	Mirab Abaya	Mole	6	1	0	1	1	0	0	0		2		2			8		8		2	2		3	2	3	1	1	0	2	0	0	1	5	2
2023-08-24	Mirab Abaya	Mole	5	1	0	3	0	0	1	0		2		2			8		8		2	2		3	2	3	2						2		2
2023-08-23	Mirab Abaya	Mole	6	1	0	3	0	0	1	0		2		1	5		2		2		2	2		3	2	2	1	0	0	8	0	0	1	15	2
2023-08-23	Mirab Abaya	Mole	8	1	0	1	1	0	0	0		2		2			5		5		2	2		3	2	3	1	1	0	0	0	0	2		2
2023-08-23	Mirab Abaya	Mole	3	1	3	1	1	0	0	0		2		1	5		5		5		2	2		1	1	1	2						2		2
2023-08-23	Mirab Abaya	Mole	3	1	3	1	1	0	0	0		2		2			8		8		2	2		2	2	2	2						2		2
2023-08-23	Mirab Abaya	Mole	4	1	0	3	0	0	1	0		2		2			5		5		2	2		3	2	3	1	2	0	0	0	0	2		2
2023-08-23	Mirab Abaya	Mole	3	1	0	1	1	0	0	0		2		2			8		8		2	2		2	1	2	2						2		2
2023-08-24	Arba Minch zuria	Lante	4	1	4	1	1	0	0	0		2		2			2		2		2	2		3	2	3	1	2	0	0	0	0	1	1	2
2023-08-24	Arba Minch zuria	Lante	3	1	3	4	0	0	0	1	Ke seli mandeja	2		1	5		2		2		2	2		1	1	1	1	1	1	0	0	0	2		2
2023-08-24	Arba Minch zuria	Lante	4	1	3	1	1	0	0	0		2		2			5		5		2	2		2	2	2	2						1	1	2
2023-08-24	Arba Minch zuria	Lante	7	1	0	3	0	0	1	0		2		1	5		2		2		2	2		4	2	4	2						2		2
2023-08-24	Arba Minch zuria	Lante	3	1	3	1	1	0	0	0		2		1	5		2		2		2	2		2	1	1	1	0	1	0	3	0	1	3	2
2023-08-24	Arba Minch zuria	Lante	1	2	0	1	1	0	0	0		2		2			2		2		2	2		1	1	1	2						1	1	2
2023-08-24	Arba Minch zuria	Lante	5	1	3	3	0	0	1	0		2		1	2		3		2		2	2		3	2	3	2						1	2	2
2023-08-24	Arba Minch zuria	Lante	4	1	4	1	1	0	0	0		2		2			2		2		2	2		1	1	1	2						2		2
2023-08-24	Arba Minch zuria	Lante	5	1	4	1	1	0	0	0		2		2			2		2		2	2		1	2	2	2						2		2
2023-08-24	Arba Minch zuria	Lante	8	1	8	1	1	0	0	0		2		2			2		2		2	2		3	2	3	1	2	2	5	5	1	1	7	2
2023-08-24	Arba Minch zuria	Lante	5	1	4	1	1	0	0	0		2		1	5		2		2		1	2		1	2	2	2						2		2
2023-08-24	Arba Minch zuria	Lante	3	1	3	3	0	0	1	0		2		1	5		2		2		2	2		1	1	2	2						1	1	2
2023-08-24	Arba Minch zuria	Lante	5	1	4	3	0	0	1	0		2		1	5		2		2		2	2		2	1	1	2						2		2
2023-08-24	Arba Minch zuria	Lante	4	1	4	3	0	0	1	0		2		1	5		2		2		2	2		1	1	2	2						1	5	2
2023-08-24	Arba Minch zuria	Lante	3	1	2	1	1	0	0	0		2		2			5		5		2	2		1	1	2	2						2		2
2023-08-24	Arba Minch zuria	Lante	5	1	2	1	1	0	0	0		2		2			2		2		2	2		1	1	1	2						2		2
2023-08-24	Arba Minch zuria	Lante	6	1	5	1	1	0	0	0		2		2			2		2		2	2		1	2	2	1	3	0	0	0	1	2		2
2023-08-24	Arba Minch zuria	Lante	8	1	7	1	1	0	0	0		2		2			2		2		2	2		1	1	1	1	0	0	1	0	0	2		2
2023-08-24	Arba Minch zuria	Lante	6	1	3	3	0	0	1	0		2		2			2		2		2	2		1	1	1	1	5	1	2	1	0	2		2
2023-08-24	Arba Minch zuria	Lante	5	1	5	1	1	0	0	0		2		2			2		2		2	2		3	2	3	2						2		2
2023-08-24	Arba Minch zuria	Lante	1	1	1	1	1	0	0	0		1		2			2		2		2	2		1	1	0	2						2		2
2023-08-24	Arba Minch zuria	Lante	6	1	3	3	0	0	1	0		2		1	5		2		2		2	2		2	2	2	1	3	1	0	0	0	1	6	2
2023-08-24	Arba Minch zuria	Lante	7	1	5	3	0	0	1	0		2		2			5		5		2	2		3	2	3	1	0	0	1	0	0	1	2	2
2023-08-24	Arba Minch zuria	Lante	4	1	1	3	0	0	1	0		2		1	5		2		2		2	2		1	1	2	2						1	5	2
2023-08-24	Arba Minch zuria	Lante	6	1	5	3	0	0	1	0		2		1	5		2		2		2	2		4	2	2	1	0	1	0	0	0	2		2
2023-08-24	Arba Minch zuria	Lante	9	1	6	3	0	0	1	0		2		2			2		2		2	2		2	2	2	1	0	0	2	0	0	1	3	2
2023-08-24	Arba Minch zuria	Lante	6	1	4	3	0	0	1	0		2		1	3		2		2		2	2		3	3	3	2						1	11	2
2023-08-24	Arba Minch zuria	Lante	1	1	1	3	0	0	1	0		2		1	5		2		2		2	2		3	2	3	2						1	4	2
2023-08-24	Arba Minch zuria	Lante	5	1	5	3	0	0	1	0		2		1	3		2		2		2	2		2	2	3	2						1	2	2
2023-08-24	Arba Minch zuria	Lante	7	1	6	3	0	0	1	0		2		2			2		2		2	2		2	2	3	2						2		2
2023-08-24	Arba Minch zuria	Lante	7	1	7	3	0	0	1	0		2		1	5		2		2		2	2		2	1	2	2						1	1	2
2023-08-24	Arba Minch zuria	Lante	5	1	5	1	1	0	0	0		2		1	5		8		8		2	2		2	1	2	1	2	0	0	0	0	2		2
2023-08-24	Arba Minch zuria	Lante	2	1	1	1	1	0	0	0		2		2			5		5		2	2		3	2	3	2						2		2
2023-08-24	Mirab Abaya	Mole	3	1	0	3	0	0	1	0		2		1	5		2		2		2	2		1	1	1	2						2		2
2023-08-24	Mirab Abaya	Mole	6	1	0	1	1	0	0	0		2		2			8		8		2	2		2	1	2	2						1	3	2
2023-08-24	Mirab Abaya	Mole	5	1	0	1	1	0	0	0		2		2			8		8		2	2		1	1	1	2						2		2
2023-08-24	Mirab Abaya	Mole	3	1	0	1	1	0	0	0		2		2			8		8		2	2		2	1	2	2						2		2
2023-08-25	Mirab Abaya	Mole	2	1	0	1	1	0	0	0		2		2			8		8		2	2		1	1	0	2						1	2	2
2023-08-25	Mirab Abaya	Mole	2	1	0	1	1	0	0	0		2		2			8		8		2	2		2	2	1	2						2		2
2023-08-25	Mirab Abaya	Mole	3	1	3	1	1	0	0	0		2		2			8		8		2	2		2	2	2	2						1	3	2
2023-08-24	Mirab Abaya	Mole	11	1	0	1	1	0	0	0		2		2			8		8		2	2		3	2	3	1	0	1	4	0	0	1	3	2
2023-08-24	Mirab Abaya	Mole	2	1	2	1	1	0	0	0		2		1	5		5		5		2	2		2	2	2	2						1	4	2
2023-08-24	Mirab Abaya	Mole	4	1	2	3	0	0	1	0		2		1	5		2		2		2	2		2	2	3	2						2		2
2023-08-24	Mirab Abaya	Mole	5	1	0	3	0	0	1	0		2		1	5		2		2		2	2		1	1	1	2						1	5	2
2023-08-24	Mirab Abaya	Mole	6	1	0	1	1	0	0	0		2		1	5		5		5		2	2		1	2	1	2						1	1	2
2023-08-24	Mirab Abaya	Mole	7	1	0	3	0	0	1	0		2		1	5		2		2		2	2		4	3	6	2						1	3	2
2023-08-25	Mirab Abaya	Alge	5	1	2	3	0	0	1	0		2		1	5		2		2		2	2		3	2	3	2						1	3	2
2023-08-25	Mirab Abaya	Mole	1	2	0	1	1	0	0	0		2		2			5		5		2	2		1	1	1	2						2		2
2023-08-24	Mirab Abaya	Mole	4	2	0	3	0	0	1	0		2		1	5		2		2		2	2		1	1	1	2						2		2
2023-08-24	Mirab Abaya	Mole	4	1	4	1	1	0	0	0		2		1	5		8		8		2	2		2	2	2	2						1	2	2
2023-08-24	Mirab Abaya	Mole	2	1	0	1	1	0	0	0		2		1	5		8		8		2	2		1	1	1	2						2		2
2023-08-24	Mirab Abaya	Mole	3	2	0	1	1	0	0	0		2		2			8		8		2	2		2	1	1	2						2		2
2023-08-24	Mirab Abaya	Mole	4	1	2	1	1	0	0	0		2		1	5		2		2		2	2		3	2	3	2						1	3	2
2023-08-24	Mirab Abaya	Mole	4	2	0	1	1	0	0	0		2		1	5		8		8		2	2		3	2	2	2						2		2
2023-08-25	Mirab Abaya	Mole	4	1	0	3	0	0	1	0		2		1	3		3		3		2	2		3	2	2	2						1	5	2
2023-08-25	Mirab Abaya	Mole	7	2	0	1	1	0	0	0		2		2			8		8		1	2		2	1	2	1	0	0	4	0	0	1	5	2
2023-08-26	Arba Minch zuria	Lante	7	1	3	3	0	0	1	0		2		1	4		3		3		2	2		3	2	3	1	6	1	40	0	0	2		2
2023-08-26	Arba Minch zuria	Lante	2	1	2	3	0	0	1	0		2		1	5		2		2		2	2		2	2	2	2						2		2
2023-08-28	Mirab Abaya	U Lante	4	1	2	1	1	0	0	0		2		2			2		2		2	2		1	2	1	1	2	1	0	0	0	1	3	2
2023-08-28	Mirab Abaya	U Lante	5	1	3	1	1	0	0	0		2		2			5		5		2	2		1	2	3	1	2	1	0	0	0	2		2
2023-08-28	Mirab Abaya	U Lante	12	1	2	3	0	0	1	0		2		1	5		3		3		2	2		3	2	3	1	5	1	0	0	3	1	5	2
2023-08-28	Mirab Abaya	U Lante	10	1	8	3	0	0	1	0		2		1	5		2		2		2	2		2	2	3	2						1	4	2
2023-08-28	Mirab Abaya	U Lante	8	1	8	1	1	0	0	0		2		2			2		2		2	2		2	2	3	2						1	2	2
2023-08-28	Mirab Abaya	U Lante	6	1	6	1	1	0	0	0		2		2			8		8		2	2		3	2	3	1	0	0	4	0	0	1	5	2
2023-08-28	Mirab Abaya	U Lante	7	1	6	3	0	0	1	0		2		1	4		3		3		1	1	1	4	2	4	1	5	1	1	0	2	2		2
2023-08-28	Mirab Abaya	U Lante	8	1	4	1	1	0	0	0		2		2			8		8		2	2		3	2	3	1	2	0	0	0	0	2		2
2023-08-28	Mirab Abaya	U Lante	2	1	1	3	0	0	1	0		2		2			2		2		2	2		2	2	4	2						2		2
2023-08-28	Mirab Abaya	U Lante	5	1	5	1	1	0	0	0		2		2			2		2		2	2		1	2	2	2						2		2
2023-08-28	Mirab Abaya	U Lante	9	1	4	3	0	0	1	0		2		1	4		3		3		1	1	2	4	2	4	1	1	0	2	0	0	1	1	2
2023-08-28	Mirab Abaya	U Lante	2	2	0	1	1	0	0	0		2		1	5		8		8		2	2		1	1	1	2						1	1	2
2023-08-28	Mirab Abaya	U Lante	5	1	5	1	1	0	0	0		2		2			8		8		2	2		2	2	2	2						1	1	2
2023-08-28	Mirab Abaya	U Lante	6	1	1	1	1	0	0	0		2		2			5		5		2	2		1	1	1	1	1	1	0	0	0	2		2
2023-08-28	Mirab Abaya	U Lante	8	1	1	1	1	0	0	0		2		1	5		2		2		2	2		3	2	3	1	2	2	0	0	0	1	7	2
2023-08-28	Mirab Abaya	U Lante	4	2	0	1	1	0	0	0		2		1	5		8		8		2	2		2	1	2	2						2		2
2023-08-28	Mirab Abaya	U Lante	6	1	2	1	1	0	0	0		2		2			8		8		2	2		3	2	3	1	1	0	2	0	0	1	2	2
2023-08-29	Mirab Abaya	U Lante	4	1	3	1	1	0	0	0		2		2			2		2		2	2		1	1	1	2						2		2
2023-08-29	Mirab Abaya	U Lante	4	1	0	1	1	0	0	0		2		1	5		2		2		2	2		1	1	1	2						2		2
2023-08-29	Mirab Abaya	U Lante	6	1	3	1	1	0	0	0		2		1	5		2		2		2	2		2	2	4	2						1	1	2
2023-08-29	Mirab Abaya	U Lante	4	1	4	1	1	0	0	0		2		1	5		2		2		2	2		1	2	2	2						2		2
2023-08-29	Mirab Abaya	U Lante	7	1	2	1	1	0	0	0		2		1	5		2		2		2	2		2	2	3	2						2		2
2023-08-29	Mirab Abaya	U Lante	4	1	3	1	1	0	0	0		2		2			5		5		2	2		3	2	3	1	2	0	1	0	1	1	1	2
2023-08-29	Mirab Abaya	U Lante	3	1	3	3	0	0	1	0		2		1	5		2		2		2	2		1	1	1	2						1	3	2
2023-08-29	Mirab Abaya	U Lante	6	1	2	3	0	0	1	0		2		1	5		6		3		1	1	1	3	2	3	2						2		2
2023-08-29	Mirab Abaya	U Lante	6	1	0	3	0	0	1	0		2		1	1		2		2		2	2		4	2	4	2						1	7	2
2023-08-29	Mirab Abaya	U Lante	6	1	0	1	1	0	0	0		2		1	5		2		2		2	2		4	2	4	1	3	0	6	0	0	1	6	2
2023-08-28	Mirab Abaya	U Lante	8	2	0	1	1	0	0	0		2		2			6		6		2	2		2	2	2	1	3	1	2	0	2	1	4	2
2023-08-28	Mirab Abaya	U Lante	5	1	5	1	1	0	0	0		2		1	5		6		6		2	2		1	1	1	1	2	0	0	0	0	1	10	2
2023-08-28	Mirab Abaya	U Lante	8	1	4	3	0	0	1	0		2		2			5		5		2	2		3	2	4	2						1	5	2
2023-08-28	Mirab Abaya	U Lante	6	1	1	1	1	0	0	0		2		2			6		5		2	2		2	1	2	1	1	1	7	0	0	1	6	2
2023-08-28	Mirab Abaya	U Lante	9	2	0	1	1	0	0	0		2		2			5		5		2	2		2	2	4	2						1	4	2
2023-08-29	Mirab Abaya	U Lante	3	2	0	1	1	0	0	0		2		2			5		5		2	2		2	2	2	1	2	0	0	0	1	1	5	2
2023-08-29	Mirab Abaya	U Lante	3	1	0	1	1	0	0	0		2		1	5		2		2		2	2		0	1	1	2						2		2
2023-08-29	Mirab Abaya	U Lante	5	1	1	1	1	0	0	0		2		1	5		2		2		2	2		1	1	1	2						2		2
2023-08-29	Mirab Abaya	U Lante	6	1	0	1	1	0	0	0		2		1	5		2		2		2	2		3	2	4	1	1	1	0	1	0	1	4	2
2023-08-29	Mirab Abaya	U Lante	5	1	0	1	1	0	0	0		2		2			5		5		2	2		2	2	3	1	2	0	2	0	0	2		2
2023-08-29	Mirab Abaya	U Lante	3	1	3	1	1	0	0	0		2		2			5		8		2	2		3	2	2	2						2		2
2023-08-29	Mirab Abaya	U Lante	5	1	1	1	1	0	0	0		2		2			8		8		1	1	2	3	2	2	2						2		2
2023-08-29	Mirab Abaya	U Lante	3	1	3	1	1	0	0	0		2		2			8		8		2	2		3	2	4	1	1	0	0	0	0	1	1	2
2023-08-29	Mirab Abaya	U Lante	9	1	0	1	1	0	0	0		2		1	5		2		2		2	2		2	2	4	2						2		2
2023-08-29	Mirab Abaya	U Lante	6	1	4	3	0	0	1	0		2		2			2		2		2	2		2	2	3	2						2		2
2023-08-29	Mirab Abaya	U Lante	7	1	6	1	1	0	0	0		2		2			2		5		2	2		1	1	1	2						2		1	2
2023-08-29	Mirab Abaya	U Lante	5	2	0	1	1	0	0	0		2		1	5		2		2		2	2		3	2	4	2						2		2
2023-08-29	Mirab Abaya	U Lante	6	1	0	3	0	0	1	0		2		1	5		3		3		1	2		4	2	3	2						2		2
2023-08-29	Mirab Abaya	U Lante	8	1	0	3	0	0	1	0		2		2			5		5		2	2		2	2	3	1	3	1	10	0	0	2		2
2023-08-29	Mirab Abaya	U Lante	6	1	0	1	1	0	0	0		2		2			5		5		2	2		1	1	1	2						2		2
2023-08-29	Mirab Abaya	U Lante	4	1	2	1	1	0	0	0		2		2			2		2		2	2		3	2	3	2						2		2
2023-08-29	Mirab Abaya	U Lante	2	1	0	1	1	0	0	0		2		2			2		2		2	2		3	2	3	1	5	0	0	0	0	1	4	2
2023-08-29	Mirab Abaya	U Lante	1	2	0	1	1	0	0	0		2		2			5		5		2	2		1	1	2	2						2		2
2023-08-29	Mirab Abaya	U Lante	3	1	0	1	1	0	0	0		2		2			8		8		2	2		3	2	3	2						2		2
2023-08-29	Mirab Abaya	U Lante	4	1	0	3	0	0	1	0		2		1	5		2		2		2	2		3	2	4	1	4	0	0	0	2	2		2
2023-08-29	Mirab Abaya	U Lante	5	1	0	3	0	0	1	0		2		1	5		2		2		2	2		3	2	2	2						2		2
2023-08-29	Mirab Abaya	U Lante	4	1	0	1	1	0	0	0		2		1	5		2		2		2	2		4	2	4	1	2	0	0	0	0	2		2
2023-08-29	Mirab Abaya	U Lante	5	1	2	1	1	0	0	0		2		2			8		8		2	2		2	1	2	2						2		2
2023-08-29	Mirab Abaya	U Lante	5	1	0	1	1	0	0	0		2		2			2		2		2	2		3	2	3	1	4	1	5	0	0	2		2
2023-08-29	Mirab Abaya	U Lante	8	1	7	3	0	0	1	0		2		1	5		2		2		2	2		3	2	4	1	4	0	0	0	1	2		2
2023-08-29	Mirab Abaya	U Lante	7	1	0	1	1	0	0	0		2		2			2		2		2	2		2	2	3	1	1	1	7	0	1	1	2	2
2023-08-29	Mirab Abaya	U Lante	1	2	0	1	1	0	0	0		2		2			2		2		2	2		1	1	1	2						2		2
2023-08-29	Mirab Abaya	U Lante	2	1	2	1	1	0	0	0		2		2			8		8		2	2		3	2	4	2						2		2
2023-08-29	Mirab Abaya	U Lante	6	1	5	1	1	0	0	0		2		1	5		2		2		2	2		4	2	4	1	4	0	0	0	0	2		2
2023-08-29	Mirab Abaya	U Lante	3	1	0	1	1	0	0	0		2		1	5		2		2		2	2		3	2	3	2						1	2	2
2023-08-29	Mirab Abaya	U Lante	8	1	2	1	1	0	0	0		2		1	5		2		2		2	2		4	2	5	1	4	0	0	0	0	1	3	2
2023-08-29	Mirab Abaya	U Lante	9	1	0	1	1	0	0	0		2		2			2		2		2	2		1	2	3	1	2	0	1	0	0	2		2
2023-08-29	Mirab Abaya	Ankober	8	2	0	3	0	0	1	0		2		1	5		2		2		2	2		3	2	3	2						1	16	2
2023-08-29	Mirab Abaya	Ankober	9	2	0	1	1	0	0	0		2		2			8		8		2	2		2	1	2	2						2		2
2023-08-29	Mirab Abaya	Ankober	3	2	0	1	1	0	0	0		2		1	5		2		2		2	2		2	1	2	1	0	1	0	0	0	2		2
2023-08-29	Mirab Abaya	Ankober	5	1	0	3	0	0	1	0		2		1	5		8		8		2	2		3	2	3	1	0	1	2	0	0	1	8	2
2023-08-29	Mirab Abaya	Ankober	3	1	0	1	1	0	0	0		2		1	5		2		2		2	2		2	1	2	2						1	4	2
2023-08-29	Mirab Abaya	Ankober	7	1	0	1	1	0	0	0		2		2			8		8		2	2		3	2	3	1	2	0	0	0	1	1	1	2
2023-08-29	Mirab Abaya	Ankober	7	2	0	1	1	0	0	0		2		1	5		2		2		2	2		3	2	3	1	1	0	0	0	0	1	4	2
2023-08-26	Mirab Abaya	Mole	4	2	0	1	1	0	0	0		2		1	5		8		2		2	2		2	1	1	2						2		2
2023-08-29	Mirab Abaya	Ankober	5	1	2	1	1	0	0	0		2		1	5		5		8		2	2		1	1	2	1	2	0	0	0	0	1	5	2
2023-08-29	Mirab Abaya	Ankober	1	2	0	1	1	0	0	0		2		1	5		8		8		2	2		1	1	1	2						2		2
2023-08-29	Mirab Abaya	Ankober	3	1	0	1	1	0	0	0		2		2			1		8		2	2		2	1	2	1	1	0	0	0	0	2		2
2023-08-29	Mirab Abaya	Ankober	3	1	0	3	0	0	1	0		2		2			8		8		2	2		3	2	3	2						2		2
2023-08-29	Mirab Abaya	Ankober	8	2	0	3	0	0	1	0		2		2			8		8		2	2		4	2	4	1	1	0	1	0	0	1	3	2
2023-08-29	Mirab Abaya	Ankober	1	1	0	1	1	0	0	0		2		2			1		8		2	2		1	1	1	2						2		2
2023-08-29	Mirab Abaya	Ankober	8	1	1	1	1	0	0	0		2		2			8		8		2	2		3	2	3	1	1	0	3	0	0	1	3	2
2023-08-29	Mirab Abaya	Ankober	2	2	0	1	1	0	0	0		2		2			1		8		2	2		2	1	1	2						2		2
2023-08-30	Mirab Abaya	U Lante	3	1	1	1	1	0	0	0		2		2			2		2		2	2		1	1	1	2						2		2
2023-08-30	Mirab Abaya	U Lante	3	2	0	1	1	0	0	0		2		2			2		2		2	2		1	1	1	2						2		2
2023-08-30	Mirab Abaya	U Lante	4	1	3	3	0	0	1	0		2		1	5		2		2		2	2		2	2	3	2						2		2
2023-08-30	Mirab Abaya	U Lante	5	1	5	1	1	0	0	0		2		1	5		2		2		2	2		2	2	3	1	1	0	4	0	0	1	5	2
2023-08-30	Mirab Abaya	U Lante	2	1	2	1	1	0	0	0		2		1	5		2		2		2	2		1	1	1	2						2		2
2023-08-29	Mirab Abaya	U Lante	6	1	0	3	0	0	1	0		2		2			8		8		2	2		3	3	3	2						2		2
2023-08-30	Mirab Abaya	U Lante	6	1	0	1	1	0	0	0		2		2			5		5		2	2		2	2	3	1	1	0	0	0	0	1	1	2
2023-08-30	Mirab Abaya	U Lante	2	2	0	3	0	0	1	0		2		1	5		2		2		2	2		2	2	2	2						2		2
2023-08-30	Mirab Abaya	U Lante	4	1	0	3	0	0	1	0		2		1	5		2		3		2	2		3	2	3	1	2	0	0	0	1	2		2
2023-08-30	Mirab Abaya	U Lante	7	1	1	3	0	0	1	0		2		1	5		3		3		2	2		2	2	2	1	0	0	4	0	0	2		2
2023-08-30	Mirab Abaya	Ankober	3	2	0	1	1	0	0	0		2		1	5		5		1		2	2		3	2	3	2						1	10	2
2023-08-30	Mirab Abaya	Ankober	4	1	0	3	0	0	1	0		2		2			5		5		2	2		2	2	3	2						2		2
2023-08-30	Mirab Abaya	Ankober	4	1	0	1	1	0	0	0		2		1	5		5		5		2	2		2	2	3	1	3	0	2	0	0	2		2
2023-08-30	Mirab Abaya	Ankober	7	2	0	1	1	0	0	0		2		1	5		8		2		2	2		2	2	2	1	0	1	0	0	0	2		2
2023-08-30	Mirab Abaya	Ankober	6	1	0	1	1	0	0	0		2		2			8		8		2	2		3	2	3	2						1	4	2
2023-08-30	Mirab Abaya	Ankober	10	1	1	3	0	0	1	0		2		1	5		8		8		2	2		2	2	2	1	0	0	4	0	0	1	1	2
2023-08-30	Mirab Abaya	Ankober	3	1	0	1	1	0	0	0		2		2			8		8		2	2		1	1	1	2						2		2
2023-08-30	Mirab Abaya	Ankober	3	2	0	1	1	0	0	0		2		2			8		8		2	2		3	2	2	2						2		2
2023-08-30	Mirab Abaya	Ankober	3	2	0	3	0	0	1	0		2		2			8		8		2	2		3	2	3	2						2		2
2023-08-30	Mirab Abaya	Ankober	6	1	0	1	1	0	0	0		2		1	5		8		8		2	2		2	2	2	1	1	0	0	0	0	1	5	2
2023-08-30	Mirab Abaya	U Lante	4	1	0	1	1	0	0	0		2		2			8		8		2	2		3	1	3	1	1	1	2	0	0	2		2
2023-08-30	Mirab Abaya	U Lante	3	1	2	1	1	0	0	0		2		2			8		8		2	2		1	1	1	2						2		2
2023-08-30	Mirab Abaya	U Lante	8	1	3	1	1	0	0	0		2		1	2		2		2		2	2		5	2	4	1	3	0	1	0	0	1	3	2
2023-08-30	Mirab Abaya	U Lante	4	1	4	1	1	0	0	0		2		1	5		2		2		2	2		3	2	3	2						1	4	2
2023-08-30	Mirab Abaya	U Lante	5	1	2	3	0	0	1	0		2		1	5		2		2		2	2		3	2	3	2						2		2
2023-08-30	Mirab Abaya	U Lante	7	1	0	1	1	0	0	0		2		2			8		8		2	2		3	1	3	1	1	0	0	0	1	2		2
2023-08-30	Mirab Abaya	U Lante	6	1	2	3	0	0	1	0		2		1	3		3		3		2	2		3	2	3	1	0	0	9	0	0	2		2
2023-08-30	Mirab Abaya	U Lante	6	1	3	3	0	0	1	0		2		2			8		8		2	2		4	2	4	1	4	0	2	0	1	2		2
2023-08-30	Mirab Abaya	U Lante	8	1	1	3	0	0	1	0		2		1	5		2		2		2	2		5	2	3	1	4	0	7	0	0	1	1	2
2023-08-30	Mirab Abaya	U Lante	6	1	2	1	1	0	0	0		2		2			5		5		2	2		2	2	2	1	6	0	0	0	1	1	7	2
2023-08-30	Mirab Abaya	U Lante	4	1	3	1 3	1	0	1	0		2		1	3		2		2		2	2		4	2	4	1	4	0	0	0	2	1	4	2
2023-08-30	Mirab Abaya	U Lante	7	1	3	1	1	0	0	0		2		1	5		2		2		2	2		2	2	3	1	4	0	5	1	0	1	5	2
2023-08-30	Mirab Abaya	U Lante	11	2	0	1	1	0	0	0		2		2			8		8		2	2		2	2	3	2						1	4	1	2
2023-08-30	Mirab Abaya	U Lante	6	1	6	3	0	0	1	0		2		2			2		2		2	2		3	2	3	2						2		2
2023-08-30	Mirab Abaya	U Lante	6	1	5	1	1	0	0	0		2		2			2		2		2	2		2	2	3	2						1	5	2
2023-08-30	Mirab Abaya	U Lante	3	1	3	1	1	0	0	0		1		2			9	Sari betinew	9	Saribetinew	2	2		1	1	0	2						1	9	2
2023-08-30	Mirab Abaya	U Lante	5	1	3	3	0	0	1	0		2		1	5		2		2		2	2		2	2	3	2						1	2	2
2023-08-30	Mirab Abaya	U Lante	1	1	1	1	1	0	0	0		2		1	5		2		2		2	2		1	1	2	2						2		2
2023-08-30	Mirab Abaya	U Lante	6	1	6	1	1	0	0	0		2		1	5		2		2		2	2		2	1	2	2						2		2
2023-08-30	Mirab Abaya	U Lante	4	2	0	3	0	0	1	0		2		2			8		8		2	2		2	2	3	1	3	0	0	0	1	2		2
2023-08-30	Mirab Abaya	U Lante	4	1	0	1	1	0	0	0		2		1	5		2		2		2	2		2	2	3	2						2		2
2023-08-30	Mirab Abaya	Ankober	3	1	3	1	1	0	0	0		2		2			5		5		2	2		2	3	2	2						2		2
2023-08-30	Mirab Abaya	Ankober	2	2	0	3	0	0	1	0		2		1	5		2		2		2	2		1	1	1	2						2		2
2023-08-30	Mirab Abaya	Ankober	7	1	0	3	0	0	1	0		2		2			5		5		2	2		3	2	3	1	1	0	0	0	0	2		2
2023-08-30	Mirab Abaya	Ankober	3	2	0	3	0	0	1	0		2		1	3		4		2		2	2		3	2	2	1	1	1	2	0	1	2		2
2023-08-30	Mirab Abaya	Ankober	6	2	0	1	1	0	0	0		2		2			5		5		2	2		3	3	3	1	1	1	1	0	0	2		2
2023-08-30	Mirab Abaya	Ankober	5	2	0	3	0	0	1	0		2		1	5		2		2		2	2		3	2	3	1	1	0	0	0	0	1	3	2
2023-08-30	Mirab Abaya	Ankober	7	1	0	1	1	0	0	0		2		1	5		2		2		2	2		3	2	3	1	3	0	0	0	0	1	6	2
2023-08-30	Mirab Abaya	Ankober	4	2	0	1	1	0	0	0		2		2			8		8		2	2		2	1	2	2						2		2
2023-08-30	Mirab Abaya	Ankober	4	1	0	1	1	0	0	0		2		2			1		5		2	2		2	1	2	2						2		2
2023-08-30	Mirab Abaya	Ankober	5	1	4	1	1	0	0	0		2		1	5		2		2		2	2		4	3	4	1	3	2	0	0	1	1	3	2
2023-08-30	Mirab Abaya	Ankober	5	1	0	3	0	0	1	0		2		2			1		8		2	2		3	2	3	1	0	0	1	0	0	2		2
2023-08-30	Mirab Abaya	Ankober	2	1	1	1	1	0	0	0		2		1	5		2		2		2	2		1	1	1	2						2		2
2023-08-30	Mirab Abaya	Ankober	8	2	0	1	1	0	0	0		2		1	5		2		2		2	2		3	2	3	1	2	0	0	0	2	2		2
2023-08-30	Mirab Abaya	Ankober	1	1	0	1	1	0	0	0		2		2			8		8		2	2		1	1	1	2						2		2
2023-08-30	Mirab Abaya	Ankober	9	1	0	1	1	0	0	0		2		2			8		8		2	2		3	2	3	2						2		2
2023-08-30	Mirab Abaya	Ankober	6	1	6	3	0	0	1	0		2		1	5		2		2		2	2		3	2	3	2						1	6	2
2023-08-30	Mirab Abaya	Ankober	6	1	0	2	0	1	0	0		2		1	3		7		7		2	2		5	2	4	1	1	0	0	0	0	2		2
2023-08-30	Mirab Abaya	Ankober	4	2	0	3	0	0	1	0		2		1	5		2		2		2	2		2	1	2	1	0	0	0	0	1	1	2	2
2023-08-31	Mirab Abaya	U Lante	2	1	2	3	0	0	1	0		2		2			2		2		2	2		2	2	2	2						1	2	2
2023-08-31	Mirab Abaya	U Lante	5	1	5	1	1	0	0	0		2		2			1		2		2	2		2	2	2	2						2		2
2023-08-30	Mirab Abaya	U Lante	8	1	2	1	1	0	0	0		2		2			5		5		2	2		2	2	2	1	7	0	0	0	2	2		2
2023-08-31	Mirab Abaya	U Lante	4	1	0	3	0	0	1	0		2		1	4		4		4		2	2		2	2	3	1	2	0	0	0	1	1	7	2
2023-08-31	Mirab Abaya	U Lante	3	1	2	3	0	0	1	0		2		1	5		2		2		2	2		3	3	4	2						2		2
2023-08-31	Mirab Abaya	Ankober	3	1	0	1	1	0	0	0		2		1	5		5		5		2	2		2	1	2	2						2		2
2023-08-31	Mirab Abaya	Ankober	4	1	0	3	0	0	1	0		2		2			8		8		2	2		1	1	1	1	2	0	0	0	0	2		2
2023-08-31	Mirab Abaya	U Lante	7	1	0	1	1	0	0	0		2		1	5		8		8		2	2		3	2	4	2						2		2
2023-08-31	Mirab Abaya	U Lante	5	1	0	1	1	0	0	0		2		2			8		8		2	2		2	2	2	2						2		2
2023-08-31	Mirab Abaya	Ankober	3	2	0	1	1	0	0	0		2		2			1		8		1	2		1	1	1	2						2		2
2023-08-31	Mirab Abaya	Ankober	4	2	0	3	0	0	1	0		2		2			8		8		2	2		1	1	1	1	0	0	0	0	1	2		2
2023-08-31	Mirab Abaya	Ankober	5	1	0	1	1	0	0	0		2		1	5		2		2		2	2		3	2	3	1	0	0	2	0	0	2		2
2023-08-31	Mirab Abaya	Ankober	6	1	6	1	1	0	0	0		2		2			8		8		2	2		2	2	2	1	0	0	3	0	0	1	5	2
2023-08-31	Mirab Abaya	Ankober	5	1	5	1	1	0	0	0		2		2			8		8		2	2		2	2	3	2						2		2
2023-08-31	Mirab Abaya	Ankober	8	1	0	1	1	0	0	0		2		1	5		2		2		2	2		3	2	3	1	1	0	0	0	0	1	6	2
2023-08-31	Mirab Abaya	Ankober	4	1	3	3	0	0	1	0		2		2			8		8		2	2		1	1	1	1	1	0	2	0	0	2		2
2023-08-31	Mirab Abaya	Ankober	6	1	0	3	0	0	1	0		2		2			8		8		2	2		3	2	2	2						2		2
2023-08-31	Mirab Abaya	Ankober	6	1	0	1	1	0	0	0		2		2			8		8		2	2		1	1	1	2						2		2
2023-08-31	Mirab Abaya	Ankober	4	1	0	1	1	0	0	0		2		2			8		8		2	2		1	1	1	2						2		2
2023-08-31	Mirab Abaya	Ankober	3	2	0	1	1	0	0	0		2		1	5		8		2		2	2		1	1	2	2						2		2
2023-08-31	Mirab Abaya	Ankober	6	1	0	1	1	0	0	0		2		2			8		8		2	2		2	2	2	2						2		2
2023-08-31	Mirab Abaya	Ankober	4	1	2	1	1	0	0	0		2		1	5		8		8		2	2		3	2	2	1	0	1	0	0	0	2		2
2023-08-31	Mirab Abaya	Ankober	6	1	0	3	0	0	1	0		2		1	5		3		5		2	2		2	2	2	2						2		2
2023-08-31	Mirab Abaya	Ankober	3	1	0	1	1	0	0	0		2		1	5		2		2		2	2		3	2	3	2						1	1	2
2023-08-31	Mirab Abaya	Ankober	9	1	4	1	1	0	0	0		2		2			8		8		2	2		3	2	2	1	3	0	0	0	1	1	4	2
2023-08-31	Mirab Abaya	Ankober	1	1	1	1	1	0	0	0		2		1	5		2		2		2	2		1	1	1	2						2		2
2023-08-31	Mirab Abaya	Ankober	3	1	0	1	1	0	0	0		2		1	5		2		2		2	2		1	1	1	1	2	0	0	0	0	2		2
2023-08-31	Mirab Abaya	Ankober	4	1	4	1	1	0	0	0		2		2			8		8		2	2		1	1	1	2						1	2	2
2023-08-31	Mirab Abaya	Ankober	6	1	5	1	1	0	0	0		2		2			8		8		2	2		3	2	2	2						2		2
2023-09-01	Mirab Abaya	Ankober	3	1	0	1	1	0	0	0		2		1	5		8		8		2	2		2	1	2	2						2		2
2023-08-31	Mirab Abaya	Ankober	8	1	0	1	1	0	0	0		2		1	5		2		2		2	2		2	1	3	1	0	0	1	0	0	1	1	2
2023-08-31	Mirab Abaya	Ankober	6	1	0	3	0	0	1	0		2		1	5		2		2		2	2		3	2	3	2						2		2
2023-08-31	Mirab Abaya	Ankober	4	2	0	1	1	0	0	0		2		1	5		5		5		2	2		2	1	1	1	0	0	3	0	0	2		2
2023-08-31	Mirab Abaya	Ankober	7	2	0	3	0	0	1	0		2		1	5		2		2		2	2		3	2	3	2						1	1	2
2023-08-31	Mirab Abaya	Ankober	8	1	0	3	0	0	1	0		2		1	5		2		2		2	2		3	2	3	1	1	0	0	0	0	1	18	2
2023-08-31	Mirab Abaya	Ankober	5	2	0	3	0	0	1	0		2		1	5		2		2		2	2		2	2	2	1	0	1	0	0	0	1	4	2
2023-08-31	Mirab Abaya	Ankober	3	2	0	1	1	0	0	0		2		1	5		2		2		2	2		2	2	2	2						2		2
2023-08-31	Mirab Abaya	Ankober	5	1	1	3	0	0	1	0		2		1	5		2		2		2	2		2	2	2	1	0	0	4	0	0	1	5	2
2023-08-31	Mirab Abaya	Ankober	9	1	0	1	1	0	0	0		2		1	5		5		5		2	2		3	2	3	1	1	0	2	0	0	1	3	2
2023-09-01	Mirab Abaya	Ankober	5	1	0	3	0	0	1	0		2		1	4		3		3		2	2		3	2	3	2						1	10	2
2023-08-31	Mirab Abaya	Ankober	6	1	0	1	1	0	0	0		2		2			8		8		2	2		3	2	2	1	1	0	1	0	0	1	5	2
2023-09-01	Mirab Abaya	Ankober	5	1	0	3	0	0	1	0		2		2			8		8		2	2		1	1	1	2						2		2
2023-08-31	Mirab Abaya	Ankober	7	1	6	1	1	0	0	0		2		2			1		8		2	2		2	1	2	2						1	1	2
2023-08-31	Mirab Abaya	Ankober	5	1	0	3	0	0	1	0		2		2			8		8		2	2		3	2	2	2						1	4	2
2023-08-31	Mirab Abaya	Ankober	6	1	3	1	1	0	0	0		2		1	5		5		5		2	2		3	2	3	1	4	0	0	0	0	1	4	2
2023-09-01	Mirab Abaya	Ankober	4	1	4	1	1	0	0	0		2		2			8		8		2	2		1	1	1	2						1	4	2
2023-09-01	Mirab Abaya	Ankober	2	1	2	1	1	0	0	0		2		2			1		8		2	2		2	1	1	1	0	0	4	0	0	2		2
2023-09-01	Mirab Abaya	Ankober	9	1	7	3	0	0	1	0		2		2			6		5		2	2		3	2	3	1	2	0	0	0	0	1	10	2
2023-09-01	Mirab Abaya	Ankober	6	2	0	3	0	0	1	0		2		1	4		7		7		2	2		3	2	3	2						2		2
2023-09-01	Mirab Abaya	Ankober	4	2	0	1	1	0	0	0		2		1	5		8		2		2	2		1	1	1	2						1	2	2
2023-09-01	Mirab Abaya	Ankober	5	2	0	3	0	0	1	0		2		1	3		6		9	Enchet ena biloket yetesera yale	2	2		3	2	3	2						2		2
2023-09-01	Mirab Abaya	Ankober	7	2	0	3	0	0	1	0		2		1	5		5		2		2	2		1	1	1	1	0	1	0	0	0	2		2
2023-09-01	Mirab Abaya	Ankober	3	2	0	3	0	0	1	0		2		1	5		5		2		2	2		1	1	2	2						2		2
2023-08-31	Mirab Abaya	U Lante	6	1	0	1	1	0	0	0		2		2			2		2		2	2		3	2	3	1	1	0	0	0	0	2		2
2023-08-31	Mirab Abaya	U Lante	7	1	0	1	1	0	0	0		2		2			5		5		2	2		3	1	2	2						2		2
2023-09-01	Mirab Abaya	Fura	9	1	9	1	1	0	0	0		2		2			8		8		2	2		3	2	3	1	2	0	8	0	0	2		2
2023-09-01	Mirab Abaya	Fura	5	1	3	1	1	0	0	0		2		2			8		8		2	2		3	2	3	2						2		2
2023-09-01	Mirab Abaya	Fura	6	1	0	1	1	0	0	0		1		2			8		8		2	2		1	1	0	2						2		2
2023-09-01	Mirab Abaya	Fura	8	1	8	1	1	0	0	0		2		2			2		2		2	2		2	2	3	2						2		2
2023-09-01	Mirab Abaya	Fura	5	1	5	1	1	0	0	0		2		2			2		2		2	2		1	1	2	2						2		2
2023-09-01	Mirab Abaya	Fura	3	1	3	1	1	0	0	0		2		1	5		2		2		2	2		1	1	1	2						2		2
2023-09-01	Mirab Abaya	Fura	2	1	2	1	1	0	0	0		2		2			1		1		2	2		1	1	1	2						2		2
2023-09-01	Mirab Abaya	Fura	7	1	3	1	1	0	0	0		2		2			5		5		2	2		3	2	2	2						2		2
2023-09-01	Mirab Abaya	Fura	4	1	3	1	1	0	0	0		2		2			5		5		2	2		3	2	3	1	1	0	3	0	0	1	11	2
2023-09-01	Mirab Abaya	Fura	8	1	8	1	1	0	0	0		2		2			5		5		1	2		3	2	3	1	0	0	2	0	0	2		2
2023-09-01	Mirab Abaya	Fura	9	1	0	1	1	0	0	0		2		2			5		5		2	2		3	2	3	2						2		2
2023-09-01	Mirab Abaya	Fura	10	1	3	1	1	0	0	0		2		2			5		5		2	2		3	2	4	1	0	0	4	0	0	2		2
2023-09-01	Mirab Abaya	Fura	6	1	1	3	0	0	1	0		2		2			8		8		2	2		3	2	4	1	0	0	2	0	0	2		2
2023-09-01	Mirab Abaya	Fura	4	1	4	1	1	0	0	0		2		2			8		8		2	2		3	2	3	1	1	0	0	0	1	2		2
2023-09-01	Mirab Abaya	Fura	4	1	2	1	1	0	0	0		1		2			8		8		2	2		1	1	0	2						1	4	2
2023-09-01	Mirab Abaya	Fura	6	1	0	1	1	0	0	0		2		2			8		8		2	2		3	2	4	1	2	0	3	0	1	2		2
2023-09-01	Mirab Abaya	Fura	3	2	0	1	1	0	0	0		2		2			2		2		2	2		2	2	2	2						1	2	2
2023-09-01	Mirab Abaya	Fura	1	1	1	1	1	0	0	0		1		2			1		8		2	2		1	1	0	1	1	1	0	0	0	2		2
2023-09-01	Mirab Abaya	Fura	10	1	10	1	1	0	0	0		2		2			2		2		2	2		3	2	4	2						2		2
2023-09-01	Mirab Abaya	Fura	5	1	5	1	1	0	0	0		2		2			1		1		2	2		2	3	3	2						2		2
2023-09-01	Mirab Abaya	Fura	5	1	5	1	1	0	0	0		1		2			1		8		2	2		1	1	1	2						1	1	2
2023-09-01	Mirab Abaya	Fura	6	1	3	1	1	0	0	0		2		2			5		5		1	2		2	1	2	2						2		2
2023-09-01	Mirab Abaya	Fura	1	1	0	1	1	0	0	0		2		2			5		5		1	2		1	1	2	2						2		2
2023-09-01	Mirab Abaya	Fura	4	1	4	1	1	0	0	0		1		2			8		8		2	2		1	2	0	2						2		2
2023-09-01	Mirab Abaya	Fura	5	2	0	1	1	0	0	0		2		2			8		8		2	2		2	2	2	2						2		2
2023-09-01	Mirab Abaya	Fura	3	1	0	1	1	0	0	0		2		2			8		8		2	2		2	2	4	2						2		2
2023-09-01	Mirab Abaya	Fura	9	2	0	1	1	0	0	0		1		2			8		8		2	2		2	2	2	2						2		2
2023-09-01	Mirab Abaya	Fura	12	1	1	1	1	0	0	0		2		2			8		8		2	2		2	2	4	2						2		2
2023-09-01	Mirab Abaya	Fura	4	1	4	1	1	0	0	0		2		2			8		8		2	2		2	1	2	2						2		1	2
2023-09-01	Mirab Abaya	Fura	5	1	5	1	1	0	0	0		2		2			2		2		2	2		2	2	3	2						2		2
2023-08-31	Mirab Abaya	U Lante	3	1	3	1	1	0	0	0		2		2			5		5		2	2		1	1	2	2						2		2
2023-09-01	Mirab Abaya	Ankober	8	1	0	3	0	0	1	0		2		2			8		8		2	2		3	2	2	1	0	1	0	0	0	1	2	2
2023-09-01	Mirab Abaya	Ankober	8	1	0	3	0	0	1	0		2		1	3		3		3		2	2		3	2	2	1	1	0	6	0	0	1	3	2
2023-09-01	Mirab Abaya	Ankober	7	1	2	1	1	0	0	0		2		1	5		2		2		2	2		3	2	3	2						2		2
2023-09-01	Mirab Abaya	Ankober	6	1	3	3	0	0	1	0		2		2			8		8		2	2		4	2	3	1	2	1	1	0	1	1	10	2
2023-09-01	Mirab Abaya	Ankober	6	1	0	1	1	0	0	0		2		1	5		8		8		2	2		3	2	3	1	2	0	0	0	1	2		2
2023-09-01	Mirab Abaya	Ankober	8	1	7	1	1	0	0	0		2		2			8		8		2	2		2	1	1	2						2		2
2023-09-01	Mirab Abaya	Ankober	6	1	0	3	0	0	1	0		2		2			8		8		2	2		3	2	3	1	2	0	0	0	0	1	8	2
2023-09-01	Mirab Abaya	Ankober	5	1	0	3	0	0	1	0		2		1	4		7		3		2	2		3	2	2	2						2		2
2023-09-01	Mirab Abaya	Ankober	6	1	0	1	1	0	0	0		2		1	5		2		2		1	2		2	1	2	2						2		2
2023-09-01	Mirab Abaya	Ankober	7	1	0	1	1	0	0	0		2		1	5		2		8		2	2		3	2	3	1	0	0	5	0	0	1	1	2
2023-09-01	Mirab Abaya	Ankober	4	1	3	1	1	0	0	0		2		2			1		1		1	2		3	2	2	2						1	4	2
2023-09-01	Mirab Abaya	Ankober	7	1	7	1	1	0	0	0		2		2			8		8		2	2		1	2	1	2						1	2	2
2023-09-01	Mirab Abaya	Ankober	9	1	0	1	1	0	0	0		2		1	5		2		2		2	2		3	2	3	1	1	0	0	0	0	1	1	2
2023-09-01	Mirab Abaya	Ankober	6	1	0	1	1	0	0	0		2		1	5		2		2		2	2		2	1	2	2						2		2
2023-09-01	Mirab Abaya	Ankober	8	1	0	3	0	0	1	0		2		2			8		8		2	2		3	2	2	1	3	0	4	0	1	2		2
2023-09-01	Mirab Abaya	Ankober	8	1	0	1	1	0	0	0		2		2			5		5		2	2		3	2	3	1	1	0	0	0	0	2		2
2023-09-01	Mirab Abaya	Ankober	3	1	2	3	0	0	1	0		2		1	5		6		2		2	2		2	2	2	2						1	6	2
2023-09-02	Mirab Abaya	Fura	3	2	0	3	0	0	1	0		2		2			2		2		2	2		3	1	1	2						2		2
2023-09-02	Mirab Abaya	Fura	3	1	3	3	0	0	1	0		2		1	5		2		2		2	2		4	2	3	2						2		2
2023-09-02	Mirab Abaya	Fura	6	2	0	1	1	0	0	0		1		2			1		1		2	2		1	1	0	1	1	0	5	0	0	2		2
2023-09-02	Mirab Abaya	Fura	7	1	1	1	1	0	0	0		2		2			5		5		2	2		3	2	4	1	0	0	3	0	0	1	1	2
2023-09-02	Mirab Abaya	Fura	8	2	0	1	1	0	0	0		2		2			5		5		2	2		3	1	4	1	3	0	15	0	0	2		2
2023-09-02	Mirab Abaya	Fura	5	1	5	1	1	0	0	0		2		2			5		5		2	2		2	2	2	1	4	0	1	0	0	2		2
2023-09-02	Mirab Abaya	Fura	3	1	3	1	1	0	0	0		2		1	5		2		2		2	2		2	2	3	1	6	0	2	0	1	1	2	2
2023-09-02	Mirab Abaya	Fura	10	1	6	3	0	0	1	0		2		1	5		2		2		2	2		3	2	4	1	5	1	8	0	1	1	8	2
2023-09-02	Mirab Abaya	Fura	9	1	0	3	0	0	1	0		2		2			8		8		2	2		3	2	3	2						2		2
2023-09-02	Mirab Abaya	Fura	3	1	3	1	1	0	0	0		2		2			8		8		2	2		2	2	2	2						2		2
2023-09-02	Mirab Abaya	Fura	2	1	0	1 3	1	0	1	0		2		2			8		8		2	2		1	1	1	2						2		2
2023-09-02	Mirab Abaya	Fura	3	2	0	1	1	0	0	0		2		2			8		8		2	2		1	1	1	2						2		2
2023-09-02	Mirab Abaya	Fura	4	1	0	1 3	1	0	1	0		2		1	5		3		3		2	2		3	2	4	1	1	0	0	0	0	2		2
2023-09-02	Mirab Abaya	Fura	3	1	3	1	1	0	0	0		2		2			8		8		2	2		1	1	1	2						2		2
2023-09-02	Mirab Abaya	Fura	4	1	3	1	1	0	0	0		1		2			8		8		2	2		1	1	1	2						2		2
2023-09-02	Mirab Abaya	Fura	2	1	2	1	1	0	0	0		2		2			8		8		2	2		1	1	1	2						2		2
2023-09-02	Mirab Abaya	Fura	3	2	0	1	1	0	0	0		2		2			5		5		2	2		3	1	2	1	1	0	0	0	0	2		2
2023-09-02	Mirab Abaya	Fura	10	2	0	3	0	0	1	0		2		2			5		5		2	2		3	1	6	1	2	0	6	0	1	2		2
2023-09-02	Mirab Abaya	Fura	3	1	0	1	1	0	0	0		2		2			5		5		2	2		2	1	1	2						1	4	2
2023-09-02	Mirab Abaya	Fura	3	2	0	3	0	0	1	0		2		2			8		8		2	2		1	1	1	1	3	0	0	0	0	1	2	2
2023-09-02	Mirab Abaya	Fura	5	2	0	3	0	0	1	0		2		1	5		3		2		2	2		2	2	3	2						1	6	2
2023-09-02	Mirab Abaya	Fura	2	1	0	3	0	0	1	0		2		2			2		2		2	2		1	1	2	2						2		2
2023-09-02	Mirab Abaya	Ankober	3	2	0	1	1	0	0	0		2		2			8		8		2	2		1	1	1	2						2		2
2023-09-02	Mirab Abaya	Fura	5	2	0	1	1	0	0	0		2		1	5		8		8		2	2		3	2	2	2						1	1	2
2023-09-02	Mirab Abaya	Fura	7	2	0	3	0	0	1	0		2		2			8		8		2	2		3	2	3	1	2	0	0	0	1	1	3	2
2023-09-02	Mirab Abaya	Fura	6	1	1	3	0	0	1	0		2		1	5		5		5		2	2		3	2	4	1	7	0	5	0	1	1	8	2
2023-09-02	Mirab Abaya	Ankober	5	1	0	3	0	0	1	0		2		2			3		3		2	2		2	2	2	2						1	4	2
2023-09-04	Mirab Abaya	Fura	8	1	0	1	1	0	0	0		2		2			8		8		2	2		2	2	2	2						2		2
2023-09-04	Mirab Abaya	Fura	1	1	0	1	1	0	0	0		2		2			8		8		2	2		4	2	3	1	2	0	1	0	0	1	2	2
2023-09-04	Mirab Abaya	Fura	5	1	3	1	1	0	0	0		2		2			8		8		2	2		4	2	4	1	3	0	8	0	3	2		2
2023-09-04	Mirab Abaya	Fura	2	1	2	1	1	0	0	0		2		2			5		5		2	2		2	2	2	1	3	0	10	0	0	1	2	2
2023-09-04	Mirab Abaya	Fura	7	1	6	3	0	0	1	0		2		1	4		3		3		2	2		4	2	4	1	6	1	11	0	0	2		2
2023-09-04	Mirab Abaya	Fura	7	1	0	1	1	0	0	0		2		2			2		2		2	2		3	2	4	2						2		2
2023-09-04	Mirab Abaya	Fura	6	1	6	1	1	0	0	0		2		2			2		2		2	2		2	2	3	1	0	1	0	0	0	2		2
2023-09-04	Mirab Abaya	Fura	5	1	1	1	1	0	0	0		2		2			2		2		2	2		2	2	4	2						2		2
2023-09-04	Mirab Abaya	Fura	3	2	0	3	0	0	1	0		2		2			2		2		2	2		2	2	4	2						1	2	2
2023-09-04	Mirab Abaya	Fura	2	1	2	1	1	0	0	0		1		2			8		8		2	2		1	1	0	2						2		2
2023-09-04	Mirab Abaya	Fura	3	2	0	1	1	0	0	0		2		2			8		8		2	2		3	3	4	1	2	0	2	0	1	2		2
2023-09-04	Mirab Abaya	Fura	6	2	0	1	1	0	0	0		2		2			8		8		2	2		3	2	4	1	4	0	6	1	2	2		2
2023-09-04	Mirab Abaya	Fura	5	1	0	1	1	0	0	0		2		2			8		8		2	2		3	2	4	1	2	0	0	0	0	2		2
2023-09-04	Mirab Abaya	Fura	12	2	0	1	1	0	0	0		1		2			8		8		2	2		3	2	4	2						1	3	2
2023-09-04	Mirab Abaya	Fura	3	1	1	1	1	0	0	0		2		2			5		5		2	2		2	2	2	1	1	0	1	0	0	2		2
2023-09-04	Mirab Abaya	Fura	3	1	3	3	0	0	1	0		2		2			5		5		2	2		1	1	1	2						2		2
2023-09-04	Mirab Abaya	Fura	3	1	3	3	0	0	1	0		2		1	4		3		3		2	2		2	1	3	2						2		2
2023-09-04	Mirab Abaya	Fura	5	1	5	3	0	0	1	0		2		2			5		5		2	2		4	4	5	2						2		2
2023-09-04	Mirab Abaya	Fura	3	2	0	1	1	0	0	0		2		2			5		5		2	2		1	1	1	2						2		2
2023-09-04	Mirab Abaya	Fura	3	1	2	1	1	0	0	0		2		2			2		2		2	2		2	2	2	2						1	2	2
2023-09-04	Mirab Abaya	Fura	4	2	0	1	1	0	0	0		2		2			2		2		2	2		1	1	2	2						2		2
2023-09-04	Mirab Abaya	Fura	4	1	4	1	1	0	0	0		2		2			2		2		2	2		1	1	1	2						2		2
2023-09-04	Mirab Abaya	Fura	8	1	3	1	1	0	0	0		2		2			8		8		2	2		2	2	4	2						2		2
2023-09-04	Mirab Abaya	Fura	4	2	0	1	1	0	0	0		2		1	5		8		2		2	2		2	4	3	2						1	5	2
2023-09-04	Mirab Abaya	Fura	2	1	0	1	1	0	0	0		2		1	5		8		8		1	1	5	2	1	2	2						1	3	2
2023-09-05	Mirab Abaya	Fura	5	1	4	1	1	0	0	0		2		1	5		8		8		2	2		2	2	3	2						2		2
2023-09-05	Mirab Abaya	Fura	4	1	0	1	1	0	0	0		2		1	5		2		2		2	2		2	2	4	1	2	0	3	0	0	1	5	2
2023-09-05	Mirab Abaya	Fura	6	1	4	1	1	0	0	0		2		2			8		8		1	1	5	2	1	2	2						1	2	2
2023-09-05	Mirab Abaya	Fura	3	2	0	1	1	0	0	0		2		2			2		2		2	2		2	1	1	2						2		2
2023-09-05	Mirab Abaya	Fura	5	1	5	1	1	0	0	0		2		1	5		2		2		2	2		2	2	4	2						2		2
2023-09-05	Mirab Abaya	Fura	2	1	0	1	1	0	0	0		2		2			2		2		2	2		1	2	3	2						2		2
2023-09-04	Mirab Abaya	Fura	3	1	0	1	1	0	0	0		2		2			8		8		2	2		3	2	4	1	0	0	0	0	0	1	2	2
2023-09-05	Mirab Abaya	Fura	8	1	6	3	0	0	1	0		2		2			8		8		2	2		3	2	4	1	2	0	6	0	0	2		2
2023-09-05	Mirab Abaya	Fura	8	1	3	3	0	0	1	0		2		1	5		2		2		2	2		3	2	3	1	5	0	10	0	1	1	4	2
2023-09-05	Mirab Abaya	Fura	1	2	0	1	1	0	0	0		2		2			8		8		2	2		1	1	2	2						2		2
2023-09-05	Mirab Abaya	Fura	1	1	0	1	1	0	0	0		2		2			5		5		2	2		1	1	1	2						2		2
2023-09-05	Mirab Abaya	Fura	1	2	0	1	1	0	0	0		2		2			5		5		2	2		1	1	1	2						2		2
2023-09-05	Mirab Abaya	Fura	7	2	0	1	1	0	0	0		2		1	5		8		8		2	2		2	2	2	1	3	0	8	0	1	2		2
2023-09-05	Mirab Abaya	Fura	9	1	2	3	0	0	1	0		2		1	4		3		3		2	2		5	2	4	1	3	0	4	0	0	2		2
2023-09-05	Mirab Abaya	Fura	3	2	0	1	1	0	0	0		2		2			8		8		2	2		2	1	1	2						1	1	2
2023-09-05	Mirab Abaya	Fura	6	2	0	1	1	0	0	0		2		1	5		2		2		2	2		4	2	5	1	4	1	0	0	1	2		2
2023-09-05	Mirab Abaya	Fura	5	1	0	1 3	1	0	1	0		2		2			8		8		2	2		3	2	4	1	2	0	0	0	1	2		2
2023-09-05	Mirab Abaya	Fura	10	1	5	3	0	0	1	0		2		1	3		3		4		2	2		3	2	4	1	10	1	7	0	5	1	6	2
2023-09-05	Mirab Abaya	Fura	4	1	0	1	1	0	0	0		2		1	5		8		8		2	2		2	1	3	2						2		2
2023-09-05	Mirab Abaya	Fura	7	1	0	3	0	0	1	0		2		1	3		3		3		2	2		3	2	4	2						1	2	2
2023-09-05	Mirab Abaya	Fura	3	1	0	1	1	0	0	0		2		1	5		8		2		2	2		2	1	2	2						2		2
2023-09-05	Mirab Abaya	Fura	1	2	0	1	1	0	0	0		3	Karta beshara	2			1		1		1	1	1	1	1	0	2						2		2
2023-09-21	Arba Minch zuria	Ch Mile	7	1	7	1	1	0	0	0		2		2			2		2		2	2		4	2	4	1	2	0	0	0	0	2		2
2023-09-21	Arba Minch zuria	Ch Mile	6	1	5	3	0	0	1	0		2		1	5		2		2		2	2		3	2	3	1	0	0	0	2	0	1	3	2
2023-09-21	Arba Minch zuria	Ch Mile	2	2	0	1	1	0	0	0		2		2			8		8		2	2		1	1	1	2						2		2
2023-09-21	Arba Minch zuria	Ch Mile	2	1	1	1	1	0	0	0		2		1	5		8		8		2	2		1	1	1	2						2		2
2023-09-21	Arba Minch zuria	Ch Mile	5	1	1	1	1	0	0	0		2		1	5		2		2		2	2		3	2	3	1	1	0	0	3	0	1	3	2
2023-09-21	Arba Minch zuria	Ch Mile	3	1	0	1	1	0	0	0		2		2			8		8		2	2		2	2	2	1	0	0	2	1	0	2		2
2023-09-21	Arba Minch zuria	Ch Mile	4	1	2	1	1	0	0	0		2		2			2		2		2	2		2	1	2	1	0	0	0	1	0	1	7	2
2023-09-05	Mirab Abaya	Fura	8	1	8	1	1	0	0	0		2		1	5		2		2		1	2		2	2	4	1	5	0	0	0	0	2		2
2023-09-05	Mirab Abaya	Fura	4	2	0	3	0	0	1	0		2		2			2		2		2	2		1	1	1	2						2		2
2023-09-05	Mirab Abaya	Fura	9	2	0	3	0	0	1	0		2		1	5		2		2		2	2		2	2	4	2						2		2
2023-09-20	Mirab Abaya	Fura	3	2	0	3	0	0	1	0		2		2			2		2		2	2		3	2	4	2						1	2	2
2023-09-21	Arba Minch zuria	Ch Mile	8	1	2	1	1	0	0	0		2		2			8		5		2	2		3	2	3	1	1	0	0	4	0	1	6	1	2
2023-09-21	Arba Minch zuria	Ch Mile	5	1	0	1	1	0	0	0		2		2			5		5		2	2		3	2	3	1	3	0	5	0	1	1	4	2
2023-09-21	Arba Minch zuria	Ch Mile	5	1	5	1	1	0	0	0		2		2			5		5		2	2		1	1	1	1	2	0	0	0	1	1	1	2
2023-09-21	Arba Minch zuria	Ch Mile	5	1	3	1	1	0	0	0		2		2			2		2		2	2		1	1	1	1	1	0	0	0	1	2		2
2023-09-21	Arba Minch zuria	Ch Mile	6	1	6	1	1	0	0	0		2		2			2		2		2	2		2	1	2	2						2		2
2023-09-21	Arba Minch zuria	Ch Mile	4	1	0	3	0	0	1	0		2		1	5		3		2		2	2		5	2	4	1	0	0	0	9	0	1	2	2
2023-09-21	Arba Minch zuria	Ch Mile	6	1	6	1	1	0	0	0		2		2			8		8		2	2		3	2	3	1	0	0	0	1	0	2		2
2023-09-21	Arba Minch zuria	Ch Mile	3	1	3	1	1	0	0	0		2		2			8		8		2	2		1	1	1	2						2		2
2023-09-21	Arba Minch zuria	Ch Mile	4	1	4	1	1	0	0	0		2		2			8		8		1	2		1	1	1	1	3	0	0	2	0	1	3	2
2023-09-21	Arba Minch zuria	Ch Mile	1	1	0	1	1	0	0	0		2		2			8		8		2	2		1	1	1	2						2		2
2023-09-21	Arba Minch zuria	Ch Mile	6	1	5	1	1	0	0	0		2		2			8		8		2	2		3	2	4	1	1	0	0	1	0	1	3	2
2023-09-21	Arba Minch zuria	Ch Mile	8	1	8	1	1	0	0	0		2		2			5		5		2	2		2	2	3	1	1	0	1	0	0	1	1	2
2023-09-22	Arba Minch zuria	Ch Mile	3	1	0	1	1	0	0	0		2		1	5		2		2		2	2		2	3	3	2						1	6	2
2023-09-22	Arba Minch zuria	Ch Mile	2	1	2	3	0	0	1	0		2		2			8		2		2	2		3	3	3	2						2		2
2023-09-22	Arba Minch zuria	Ch Mile	3	1	0	1	1	0	0	0		2		2			8		8		1	2		1	1	1	1	0	1	0	0	0	2		2
2023-09-22	Arba Minch zuria	Ch Mile	4	1	3	1	1	0	0	0		2		1	5		8		8		2	2		2	2	2	2						2		2
2023-09-22	Arba Minch zuria	Ch Mile	7	1	2	3	0	0	1	0		2		2			5		5		2	2		4	2	4	1	4	1	0	2	2	1	1	2
2023-09-22	Arba Minch zuria	Ch Mile	6	1	0	3	0	0	1	0		2		1	5		2		2		2	2		3	3	4	1	5	1	0	0	1	1	1	2
2023-09-22	Arba Minch zuria	Ch Mile	3	1	0	1	1	0	0	0		2		2			2		2		2	2		2	1	2	2						2		2
2023-09-22	Arba Minch zuria	Ch Mile	7	1	3	3	0	0	1	0		2		1	5		2		2		2	2		5	4	5	1	1	1	0	0	0	2		2
2023-09-22	Arba Minch zuria	Ch Mile	6	1	3	3	0	0	1	0		2		1	4		5		5		1	2		4	4	3	1	0	2	0	4	0	1	1	2
2023-09-22	Arba Minch zuria	Ch Mile	7	2	0	3	0	0	1	0		2		2			5		5		2	2		3	2	3	1	2	1	1	1	0	1	9	2
2023-09-22	Arba Minch zuria	Ch Mile	8	1	7	3	0	0	1	0		2		2			5		5		2	2		3	2	2	1	1	0	0	3	0	1	4	2
2023-09-22	Arba Minch zuria	Ch Mile	2	2	0	1	1	0	0	0		2		1	1		2		2		2	2		2	1	2	2						2		2
2023-09-22	Arba Minch zuria	Ch Mile	3	1	0	1	1	0	0	0		2		1	6	Medaberiya	2		2		2	2		1	1	1	2						1	1	1	2
2023-09-22	Arba Minch zuria	Ch Mile	11	1	0	1	1	0	0	0		2		2			2		2		2	2		3	2	4	2						2		1	2
2023-09-22	Arba Minch zuria	Ch Mile	2	2	0	1	1	0	0	0		2		1	6	Medaberiya	2		2		2	2		2	1	2	2						2		2
2023-09-22	Arba Minch zuria	Ch Mile	4	1	4	1	1	0	0	0		2		2			2		2		2	2		2	2	3	1	3	3	5	0	0	2		2
2023-09-22	Arba Minch zuria	Ch Mile	4	1	4	1	1	0	0	0		2		1	5		2		2		2	2		2	2	3	2						1	1	2
2023-09-22	Arba Minch zuria	Ch Mile	1	1	1	1	1	0	0	0		2		2			2		2		2	2		2	1	2	2						2		2
2023-09-22	Arba Minch zuria	Ch Mile	7	1	6	1	1	0	0	0		2		1	5		2		2		2	2		2	2	4	2						1	4	2
2023-09-22	Arba Minch zuria	Ch Mile	7	1	4	1	1	0	0	0		2		1	5		2		2		2	2		2	2	4	1	1	1	3	0	0	2		2
2023-09-22	Arba Minch zuria	Ch Mile	5	1	4	1	1	0	0	0		2		2			2		2		2	2		2	2	3	2						2		2
2023-09-22	Arba Minch zuria	Ch Mile	4	1	3	1	1	0	0	0		2		1	5		2		2		1	2		2	2	3	2						2		2
2023-09-22	Arba Minch zuria	Ch Mile	5	1	5	3	0	0	1	0		2		2			2		2		2	2		3	2	3	1	1	0	0	0	0	2		2
2023-09-22	Arba Minch zuria	Ch Mile	4	1	2	1	1	0	0	0		2		1	5		8		5		2	2		3	3	2	1	2	0	0	2	0	2		2
2023-09-22	Arba Minch zuria	Ch Mile	2	1	1	1	1	0	0	0		2		1	5		5		5		2	2		2	1	2	2						1	1	2
2023-09-22	Arba Minch zuria	Ch Mile	7	1	7	3	0	0	1	0		2		2			2		2		2	2		4	2	4	1	1	1	0	3	0	2		2
2023-09-22	Arba Minch zuria	Ch Mile	6	1	0	1	1	0	0	0		2		2			2		2		2	2		3	2	3	1	2	3	0	0	1	1	7	2
2023-09-22	Arba Minch zuria	Ch Mile	5	1	0	1	1	0	0	0		2		2			2		2		1	2		3	2	3	2						1	2	2
2023-09-22	Arba Minch zuria	Ch Mile	4	1	0	1	1	0	0	0		2		1	6	Medaberjya	2		2		2	2		3	2	3	1	4	0	0	5	1	2		2
2023-09-22	Arba Minch zuria	Ch Mile	7	1	5	3	0	0	1	0		2		1	5		8		8		1	2		4	2	3	1	2	0	0	0	0	1	6	2
2023-09-22	Arba Minch zuria	Ch Mile	5	1	3	3	0	0	1	0		2		1	5		2		2		2	2		3	2	4	1	2	0	0	0	0	1	5	2
2023-09-22	Arba Minch zuria	Ch Mile	6	1	2	3	0	0	1	0		2		2			5		5		2	2		3	2	3	1	1	0	0	0	0	1	1	1	1
2023-09-22	Arba Minch zuria	Ch Mile	6	1	6	1	1	0	0	0		2		2			5		5		2	2		3	2	3	1	1	0	0	0	0	1	5	2
2023-09-22	Arba Minch zuria	Ch Mile	7	1	2	3	0	0	1	0		2		1	3		8		3		2	2		5	2	5	1	1	1	0	0	1	1	1	2
2023-09-22	Arba Minch zuria	Ch Mile	5	1	5	1	1	0	0	0		2		1	3		3		3		2	2		3	4	3	2						2		2
2023-09-22	Arba Minch zuria	Ch Mile	5	1	0	3	0	0	1	0		2		1	3		8		3		2	2		3	3	2	1	2	1	0	0	0	1	3	2
2023-09-22	Arba Minch zuria	Ch Mile	5	1	3	3	0	0	1	0		2		2			3		8		2	2		3	2	3	1	2	0	0	0	0	1	10	2
2023-09-22	Arba Minch zuria	Ch Mile	4	2	0	1	1	0	0	0		2		2			8		8		2	2		6	5	6	1	0	1	0	0	0	2		2
2023-09-22	Arba Minch zuria	Ch Mile	6	1	3	1	1	0	0	0		2		1	5		8		8		2	2		3	2	3	1	0	1	0	4	0	1	1	2
2023-09-22	Arba Minch zuria	Ch Mile	3	1	2	3	0	0	1	0		2		2			2		2		1	2		3	2	4	2						2		2
2023-09-22	Arba Minch zuria	Ch Mile	2	1	2	1	1	0	0	0		2		1	5		8		8		2	2		2	1	2	2						1	2	2
2023-09-22	Arba Minch zuria	Ch Mile	10	1	9	1	1	0	0	0		2		2			2		2		2	2		2	2	2	2						1	1	2
2023-09-22	Arba Minch zuria	Ch Mile	1	2	0	1	1	0	0	0		2		1	5		8		8		2	2		2	1	2	1	0	0	4	0	0	2		2
2023-09-22	Arba Minch zuria	Ch Mile	6	1	5	1	1	0	0	0		2		1	5		2		2		2	2		1	1	2	2						2		2
2023-09-22	Arba Minch zuria	Ch Mile	9	1	9	1	1	0	0	0		2		1	5		2		2		2	2		2	2	3	2						1	2	2
2023-09-21	Arba Minch zuria	Ch Mile	5	1	5	1	1	0	0	0		1		1	5		2		2		2	2		2	2	3	1	1	1	0	0	0	2		2
2023-09-22	Arba Minch zuria	Ch Mile	3	1	1	1	1	0	0	0		2		1	6	Medaberiya	2		2		2	2		2	1	2	2						2		2
2023-09-22	Arba Minch zuria	Ch Mile	4	1	0	1	1	0	0	0		2		2			4		3		2	2		3	2	4	2						2		2
2023-09-22	Arba Minch zuria	Ch Mile	6	1	0	3	0	0	1	0		2		1	3		4		4		2	2		4	2	4	1	0	0	0	2	0	2		2
2023-09-22	Arba Minch zuria	Ch Mile	7	2	0	1	1	0	0	0		2		2			2		2		2	2		3	2	4	1	0	0	0	1	0	2		2
2023-09-22	Arba Minch zuria	Ch Mile	3	1	3	1	1	0	0	0		2		2			5		5		2	2		2	1	2	1	1	1	0	0	1	2		2
2023-09-23	Arba Minch zuria	Ch Mile	7	1	7	1	1	0	0	0		2		1	5		2		2		2	2		3	2	2	1	2	0	0	7	1	1	3	2
2023-09-23	Arba Minch zuria	Ch Mile	4	1	1	1	1	0	0	0		2		1	5		2		2		2	2		3	2	3	1	2	0	4	0	0	1	3	2
2023-09-23	Arba Minch zuria	Ch Mile	5	1	5	1	1	0	0	0		2		2			8		5		2	2		3	2	3	1	0	2	0	0	0	2		1	2
2023-09-23	Arba Minch zuria	Ch Mile	8	1	6	1	1	0	0	0		2		1	5		2		2		2	2		3	2	4	2						2		2
2023-09-23	Arba Minch zuria	Ch Mile	3	1	3	1	1	0	0	0		2		2			2		2		2	2		2	1	2	2						2		1	2
2023-09-23	Arba Minch zuria	Ch Mile	6	1	0	1	1	0	0	0		2		2			8		8		2	2		3	3	4	1	2	0	0	0	0	1	3	2
2023-09-23	Arba Minch zuria	Ch Mile	6	1	4	1	1	0	0	0		2		2			8		8		2	2		3	2	3	1	1	0	0	0	1	1	1	2
2023-09-23	Arba Minch zuria	Ch Mile	5	1	5	1	1	0	0	0		2		1	5		2		2		2	2		3	2	2	2						1	2	2
2023-09-23	Arba Minch zuria	Ch Mile	7	1	0	1	1	0	0	0		2		1	6	Medaberiya	2		2		2	2		3	2	4	2						1	1	2
2023-09-23	Arba Minch zuria	Ch Mile	2	1	0	1	1	0	0	0		2		2			2		2		2	2		3	2	3	2						2		2
2023-09-23	Arba Minch zuria	Ch Mile	8	1	5	1	1	0	0	0		2		1	6	Medaberiya	2		2		2	2		3	2	3	1	2	1	0	0	0	1	7	2
2023-09-23	Arba Minch zuria	Ch Mile	3	1	2	1	1	0	0	0		2		2			2		2		2	2		1	1	2	2						2		2
2023-09-23	Arba Minch zuria	Ch Mile	4	1	4	1	1	0	0	0		2		1	6	Medaberiya	2		2		2	2		3	2	3	2						2		1	2
2023-09-23	Arba Minch zuria	Ch Mile	10	1	2	3	0	0	1	0		2		2			2		2		2	2		4	2	5	1	2	3	0	0	0	2		2
2023-09-23	Arba Minch zuria	Ch Mile	6	1	6	1	1	0	0	0		2		2			2		2		2	2		3	2	3	1	1	1	1	0	1	1	6	2
2023-09-23	Arba Minch zuria	Ch Mile	6	1	4	1	1	0	0	0		2		2			5		5		2	2		3	2	4	1	2	1	0	2	1	1	6	2
2023-09-23	Arba Minch zuria	Ch Mile	5	1	4	1	1	0	0	0		2		2			5		5		2	2		3	2	4	1	1	0	0	0	0	1	0	2
2023-09-23	Arba Minch zuria	Ch Mile	6	1	3	3	0	0	1	0		2		1	4		2		2		2	2		3	2	3	1	5	2	6	0	1	1	6	2
2023-09-23	Arba Minch zuria	Ch Mile	2	1	2	3	0	0	1	0		2		1	5		2		2		2	2		2	1	2	2						2		2
2023-09-23	Arba Minch zuria	Ch Mile	3	2	0	3	0	0	1	0		2		2			2		2		2	2		1	1	1	2						2		2
2023-09-23	Arba Minch zuria	Ch Mile	4	2	0	1	1	0	0	0		2		2			8		2		2	2		2	1	2	2						2		2
2023-09-23	Arba Minch zuria	Ch Mile	3	1	2	3	0	0	1	0		2		2			5		5		2	2		2	1	2	1	0	0	5	0	0	2		2
2023-09-23	Arba Minch zuria	Ch Mile	6	1	5	1	1	0	0	0		2		2			2		2		2	2		1	1	2	2						2		2
2023-09-23	Arba Minch zuria	Ch Mile	8	1	7	1	1	0	0	0		2		2			2		2		2	2		2	2	3	2						2		2
2023-09-23	Arba Minch zuria	Ch Mile	3	1	3	1	1	0	0	0		2		2			2		2		2	2		2	2	2	2						1	2	2
2023-09-23	Arba Minch zuria	Ch Mile	4	1	4	1	1	0	0	0		2		2			2		2		2	2		2	2	4	1	2	0	2	0	1	1	1	2
2023-09-23	Arba Minch zuria	Ch Mile	4	2	0	1	1	0	0	0		2		1	5		2		2		2	2		1	1	2	2						1	2	2
2023-09-23	Arba Minch zuria	Ch Mile	7	1	5	1	1	0	0	0		2		2			2		2		2	2		2	2	4	2						2		2
2023-09-23	Arba Minch zuria	Ch Mile	2	1	1	1	1	0	0	0		2		2			2		2		2	2		2	1	3	2						2		2
2023-09-23	Arba Minch zuria	Ch Mile	2	1	2	1	1	0	0	0		2		1	6	Medaberiya	2		2		2	2		3	2	3	2						1	4	1	2
2023-09-23	Arba Minch zuria	Ch Mile	1	1	0	1	1	0	0	0		2		2			2		2		2	2		1	1	1	2						2		2
2023-09-23	Arba Minch zuria	Ch Mile	4	1	0	1	1	0	0	0		2		2			2		2		2	2		2	2	2	1	1	1	0	1	0	2		2
2023-09-25	Arba Minch zuria	Ch Chalba	7	1	7	1	1	0	0	0		2		2			2		2		2	2		4	2	5	2						2		2
2023-09-25	Arba Minch zuria	Ch Chalba	8	1	8	3	0	0	1	0		2		2			5		5		2	2		4	2	3	1	5	0	0	0	2	2		1	1
2023-09-25	Arba Minch zuria	Ch Chalba	5	1	3	1	1	0	0	0		2		1	5		2		2		2	2		1	1	1	2						2		2
2023-09-25	Arba Minch zuria	Ch Chalba	5	1	5	1	1	0	0	0		2		2			5		5		2	2		2	1	2	1	0	0	1	0	0	1	1	2
2023-09-25	Arba Minch zuria	Ch Chalba	4	1	4	1	1	0	0	0		2		2			5		5		2	2		1	1	1	1	3	0	1	0	0	2		2
2023-09-23	Arba Minch zuria	Ch Mile	5	1	5	1	1	0	0	0		2		2			8		8		2	2		3	2	3	2						1	2	1	2
2023-09-25	Arba Minch zuria	Ch Chalba	6	1	4	1	1	0	0	0		2		1	5		5		5		2	2		2	1	2	2						1	1	2
2023-09-25	Arba Minch zuria	Ch Chalba	5	1	5	1	1	0	0	0		2		1	5		5		2		2	2		2	2	2	2						2		2
2023-09-25	Arba Minch zuria	Ch Chalba	7	1	4	1	1	0	0	0		2		1	5		2		2		2	2		5	2	6	2						2		2
2023-09-25	Arba Minch zuria	Ch Chalba	4	2	0	1	1	0	0	0		2		2			2		2		2	2		4	2	6	1	4	0	6	0	1	2		2
2023-09-25	Arba Minch zuria	Ch Chalba	2	1	2	1	1	0	0	0		2		1	2		5		5		2	2		3	2	2	2						2		2
2023-09-25	Arba Minch zuria	Ch Chalba	6	1	0	1	1	0	0	0		2		1	5		5		5		2	2		3	2	4	1	1	0	0	1	0	2		2
2023-09-25	Arba Minch zuria	Ch Chalba	8	1	8	3	0	0	1	0		2		1	5		2		2		2	2		3	2	4	2						1	4	2
2023-09-25	Arba Minch zuria	Ch Chalba	8	1	3	1	1	0	0	0		2		2			8		8		2	2		2	2	2	2						2		2
2023-09-25	Arba Minch zuria	Ch Chalba	4	1	4	1	1	0	0	0		2		1	5		5		5		2	2		3	2	4	1	2	0	4	0	1	1	3	2
2023-09-25	Arba Minch zuria	Ch Chalba	7	1	2	1	1	0	0	0		2		1	5		2		2		2	2		3	2	3	1	1	0	2	0	0	2		2
2023-09-25	Arba Minch zuria	Ch Chalba	3	1	3	1	1	0	0	0		2		1	5		6		6		1	2		3	2	4	2						1	5	2
2023-09-25	Arba Minch zuria	Ch Chalba	4	1	4	1	1	0	0	0		2		2			5		5		2	2		1	1	1	1	3	0	0	0	0	2		2
2023-09-25	Arba Minch zuria	Ch Chalba	5	1	5	1	1	0	0	0		2		1	5		5		5		2	2		3	2	4	1	0	0	0	1	0	1	2	2
2023-09-25	Arba Minch zuria	Ch Chalba	6	1	3	1	1	0	0	0		2		2			5		5		2	2		3	2	4	1	1	0	0	0	0	1	4	2
2023-09-25	Arba Minch zuria	Ch Chalba	3	1	3	1	1	0	0	0		2		2			2		2		2	2		2	2	3	1	2	1	0	0	0	2		2
2023-09-25	Arba Minch zuria	Ch Chalba	4	1	3	1	1	0	0	0		2		1	5		2		2		2	2		3	2	5	2						1	2	2
2023-09-25	Arba Minch zuria	Ch Chalba	8	1	8	1	1	0	0	0		2		2			2		2		2	2		1	1	2	1	1	1	0	0	0	1	2	2
2023-09-25	Arba Minch zuria	Ch Chalba	6	1	4	1	1	0	0	0		2		1	5		2		2		2	2		2	2	4	2						2		2
2023-09-25	Arba Minch zuria	Ch Chalba	2	1	2	1	1	0	0	0		2		1	5		2		2		2	2		2	2	3	2						2		2
2023-09-25	Arba Minch zuria	Ch Chalba	5	1	5	1	1	0	0	0		2		1	5		2		2		1	2		2	2	4	2						2		2
2023-09-25	Arba Minch zuria	Ch Chalba	4	1	4	1	1	0	0	0		2		1	5		2		2		2	2		2	1	2	2						2		2
2023-09-25	Arba Minch zuria	Ch Chalba	6	1	5	1	1	0	0	0		2		1	5		2		2		2	2		3	2	4	1	2	0	0	0	1	2		2
2023-09-25	Arba Minch zuria	Ch Chalba	1	1	0	1	1	0	0	0		2		2			5		5		2	2		2	2	3	1	0	0	2	0	0	1	0	2
2023-09-25	Arba Minch zuria	Ch Chalba	3	1	3	1	1	0	0	0		2		1	5		2		2		2	2		1	1	1	2						2		2
2023-09-25	Arba Minch zuria	Ch Chalba	6	1	6	1	1	0	0	0		2		1	5		2		2		2	2		2	2	4	1	0	0	0	4	1	2		2
2023-09-25	Arba Minch zuria	Ch Chalba	4	2	0	1	1	0	0	0		2		2			2		2		2	2		1	1	1	2						2		2
2023-09-25	Arba Minch zuria	Ch Chalba	7	1	6	1	1	0	0	0		2		2			2		2		2	2		4	2	6	2						1	1	2
2023-09-25	Arba Minch zuria	Ch Chalba	5	1	5	1	1	0	0	0		2		1	5		2		2		2	2		2	2	3	2						2		2
2023-09-25	Arba Minch zuria	Ch Chalba	1	1	1	1	1	0	0	0		2		1	5		2		2		2	2		2	2	2	2						2		2
2023-09-25	Arba Minch zuria	Ch Chalba	4	1	3	1	1	0	0	0		2		1	5		2		2		2	2		2	2	3	2						2		2
2023-09-25	Arba Minch zuria	Ch Chalba	2	1	2	1	1	0	0	0		2		1	6	Medaberiya	2		2		2	2		2	2	2	2						2		2
2023-09-25	Arba Minch zuria	Ch Chalba	7	1	5	1	1	0	0	0		2		1	6	Medaberiya	2		2		2	2		3	2	4	1	2	0	0	0	1	2		2
2023-09-25	Arba Minch zuria	Ch Chalba	6	1	0	1	1	0	0	0		2		2			2		2		2	2		2	2	2	2						2		2
2023-09-25	Arba Minch zuria	Ch Chalba	2	1	0	1	1	0	0	0		2		2			2		2		2	2		2	1	2	2						2		2
2023-09-25	Arba Minch zuria	Ch Chalba	7	1	0	3	0	0	1	0		2		1	3		3		3		2	2		3	2	4	2						1	1	2
2023-09-25	Arba Minch zuria	Ch Chalba	4	1	0	3	0	0	1	0		2		2			2		2		2	2		3	2	3	1	1	1	1	0	0	1	2	2
2023-09-25	Arba Minch zuria	Ch Chalba	3	1	3	1	1	0	0	0		2		2			2		2		2	2		2	1	2	1	0	0	3	0	0	2		2
2023-09-25	Arba Minch zuria	Ch Chalba	1	1	1	1	1	0	0	0		2		2			2		2		2	2		2	1	2	2						2		2
2023-09-25	Arba Minch zuria	Ch Chalba	5	1	3	2 3	0	1	1	0		2		2			2		2		2	2		4	2	4	1	0	0	2	0	0	2		2
2023-09-25	Arba Minch zuria	Ch Chalba	2	1	0	1	1	0	0	0		2		2			2		2		2	2		3	2	4	1	2	0	0	0	1	1	2	2
2023-09-25	Arba Minch zuria	Ch Chalba	5	1	0	1	1	0	0	0		2		2			2		2		2	2		2	1	2	2						2		2
2023-09-25	Arba Minch zuria	Ch Chalba	8	2	0	1	1	0	0	0		2		1	6	Medaberiya	2		2		2	2		3	2	4	1	0	1	0	0	0	1	3	2
2023-09-25	Arba Minch zuria	Ch Chalba	6	1	2	1	1	0	0	0		2		2			2		2		2	2		2	1	2	1	0	1	0	0	0	2		2
2023-09-25	Arba Minch zuria	Ch Chalba	5	1	0	1	1	0	0	0		2		1	6	Medaberiy	2		2		2	2		3	3	4	2						2		2
2023-09-25	Arba Minch zuria	Ch Chalba	3	1	3	1	1	0	0	0		2		1	1		2		2		2	2		1	1	1	2						2		2
2023-09-25	Arba Minch zuria	Ch Chalba	5	1	4	3	0	0	1	0		2		1	5		2		2		2	2		3	2	4	2						2		2
2023-09-25	Arba Minch zuria	Ch Chalba	7	1	5	3	0	0	1	0		2		2			2		2		2	2		3	4	5	2						1	3	2
2023-09-25	Arba Minch zuria	Ch Chalba	6	1	2	1	1	0	0	0		2		2			2		2		2	2		3	2	4	1	0	1	2	2	0	1	2	2
2023-09-25	Arba Minch zuria	Ch Chalba	4	1	0	3	0	0	1	0		2		1	5		2		2		2	2		3	2	2	2						2		2
2023-09-25	Arba Minch zuria	Ch Chalba	4	1	3	1	1	0	0	0		2		2			8		8		2	2		4	2	4	1	2	0	4	0	0	2		2
2023-09-25	Arba Minch zuria	Ch Chalba	2	1	0	3	0	0	1	0		2		2			8		8		2	2		4	2	3	1	1	0	0	0	1	2		2
2023-09-25	Arba Minch zuria	Ch Chalba	6	1	2	3	0	0	1	0		2		2			2		2		2	2		3	2	4	1	1	2	1	4	1	1	2	2
2023-09-25	Arba Minch zuria	Ch Chalba	2	1	2	1	1	0	0	0		2		1	5		2		2		2	2		2	2	2	2						2		2
2023-09-25	Arba Minch zuria	Ch Chalba	3	1	0	1	1	0	0	0		2		1	5		8		8		2	2		1	1	1	2						1	2	2
2023-09-25	Arba Minch zuria	Ch Chalba	7	1	7	1	1	0	0	0		2		2			5		5		2	2		3	2	4	1	1	0	2	0	0	1	2	2
2023-09-25	Arba Minch zuria	Ch Chalba	6	1	6	1	1	0	0	0		2		2			5		5		2	2		3	2	4	2						2		2
2023-09-25	Arba Minch zuria	Ch Chalba	3	1	3	1	1	0	0	0		2		2			7		5		2	2		3	2	4	1	0	0	0	2	0	2		2
2023-09-25	Arba Minch zuria	Ch Chalba	4	1	4	1	1	0	0	0		2		2			5		5		2	2		3	2	4	2						2		2
2023-09-25	Arba Minch zuria	Ch Chalba	8	1	4	1	1	0	0	0		2		1	5		2		5		2	2		3	2	2	1	0	0	0	2	0	2		2
2023-09-25	Arba Minch zuria	Ch Chalba	3	1	0	3 1	1	0	1	0		2		1	5		2		2		2	2		3	2	3	2						1	1	2
2023-09-25	Arba Minch zuria	Ch Chalba	6	1	5	1	1	0	0	0		2		1	5		5		2		2	2		3	2	4	2						1	2	2
2023-09-25	Arba Minch zuria	Ch Chalba	5	1	5	3	0	0	1	0		2		2			5		5		2	2		4	2	4	1	0	1	0	0	0	1	3	2
2023-09-25	Arba Minch zuria	Ch Chalba	4	1	2	3	0	0	1	0		2		2			5		5		2	2		2	2	3	1	1	1	6	0	0	2		2
2023-09-25	Arba Minch zuria	Ch Chalba	6	1	2	1	1	0	0	0		2		1	5		2		2		2	2		2	2	4	2						1	4	2
2023-11-22	Arba Minch zuria	Ch Chalba	1	1	0	1	1	0	0	0		2		1	5		2		2		2	2		1	1	0	1	6	0	6	0	0	2		2
2023-11-22	Arba Minch zuria	Ch Chalba	8	1	2	1	1	0	0	0		2		2			8		8		2	2		2	1	2	1	0	0	2	0	0	2		2
2023-11-22	Arba Minch zuria	Ch Chalba	6	1	1	1	1	0	0	0		2		2			8		8		2	2		3	2	3	1	1	1	6	0	0	2		2
2023-11-22	Arba Minch zuria	Ch Chalba	4	2	0	4	0	0	0	1	Mintaf	2		1	5		2		2		2	2		3	2	3	1	2	0	3	0	0	1	2	2
2023-11-22	Arba Minch zuria	Ch Chalba	3	1	0	4	0	0	0	1	Mintaf	2		1	5		2		2		2	2		3	2	2	1	0	0	0	1	0	2		2
2023-11-22	Arba Minch zuria	Ch Chalba	8	1	2	1	1	0	0	0		2		1	5		2		3		2	2		3	2	4	1	1	1	0	0	0	1	2	2
2023-11-22	Arba Minch zuria	Ch Chalba	2	1	2	1	1	0	0	0		2		2			2		2		2	2		3	2	3	2						2		2
2023-11-22	Arba Minch zuria	Ch Chalba	2	1	2	1	1	0	0	0		2		1	5		2		2		2	2		1	1	1	2						2		2
2023-11-22	Arba Minch zuria	Ch Chalba	7	1	4	1	1	0	0	0		2		2			2		2		2	2		3	2	3	1	1	1	4	0	2	2		2
2023-11-22	Arba Minch zuria	Ch Chalba	7	1	0	1	1	0	0	0		2		2			2		2		2	2		3	2	4	1	2	1	7	0	1	1	8	2
2023-11-22	Arba Minch zuria	Ch Chalba	3	2	0	3	0	0	1	0		2		2			2		2		2	2		3	2	3	2						1	2	2
2023-11-22	Arba Minch zuria	Ch Chalba	8	1	0	1	1	0	0	0		2		2			2		8		2	2		5	2	5	2						1	3	2
2023-11-22	Arba Minch zuria	Ch Chalba	2	1	1	1	1	0	0	0		2		1	5		8		8		2	2		4	2	4	2						1	3	2
2023-11-22	Arba Minch zuria	Ch Chalba	3	1	2	1	1	0	0	0		2		1	5		8		8		2	2		2	1	3	2						1	3	2
2023-11-22	Arba Minch zuria	Ch Chalba	4	1	4	1	1	0	0	0		2		1	5		8		8		2	2		2	2	2	2						1	1	2
2023-11-22	Arba Minch zuria	Ch Chalba	1	1	0	1	1	0	0	0		2		1	5		8		8		2	2		3	2	4	2						2		2
2023-11-22	Arba Minch zuria	Ch Chalba	1	2	0	1	1	0	0	0		2		1	5		8		8		2	2		2	1	2	2						2		2
2023-11-23	Arba Minch zuria	Ch Chalba	4	1	0	1	1	0	0	0		2		2			8		8		2	2		3	2	4	2						1	4	2
2023-11-23	Arba Minch zuria	Ch Chalba	2	1	0	1	1	0	0	0		2		1	5		8		8		2	2		1	1	1	2						2		2
2023-11-22	Arba Minch zuria	Ch Chalba	8	1	0	1	1	0	0	0		2		1	5		5		5		2	2		2	2	4	1	0	0	4	0	0	1	1	2
2023-11-22	Arba Minch zuria	Ch Chalba	3	1	2	1	1	0	0	0		2		2			5		5		2	2		2	2	2	1	1	0	0	0	0	1	1	2
2023-11-22	Arba Minch zuria	Ch Chalba	3	1	3	3	0	0	1	0		2		1	5		4		3		2	2		2	2	2	1	0	0	3	0	0	2		2
2023-11-22	Arba Minch zuria	Ch Chalba	2	1	0	1	1	0	0	0		2		1	5		5		5		2	2		3	2	3	2						2		1	2
2023-11-22	Arba Minch zuria	Ch Chalba	4	1	2	3	0	0	1	0		2		1	2		3		3		2	2		3	2	4	2						2		2
2023-11-22	Arba Minch zuria	Ch Chalba	8	1	2	1	1	0	0	0		2		1	5		2		5		2	2		3	2	3	1	2	0	0	0	0	1	1	1	1
2023-11-22	Arba Minch zuria	Ch Chalba	3	2	0	1	1	0	0	0		2		1	5		5		5		2	2		1	1	1	1	0	0	0	3	0	2		2
2023-11-22	Arba Minch zuria	Ch Chalba	1	1	1	1	1	0	0	0		2		2			2		2		2	2		2	1	2	1	0	0	0	5	0	2		2
2023-11-23	Arba Minch zuria	Ch Chalba	1	1	0	1	1	0	0	0		1		1	5		5		2		1	1	1	2	2	2	2						2		1	2
2023-11-23	Arba Minch zuria	Ch Chalba	3	1	0	1	1	0	0	0		2		1	5		5		2		2	2		3	2	4	1	1	0	0	0	0	2		1	2
2023-11-23	Arba Minch zuria	Ch Chalba	5	1	4	1	1	0	0	0		2		2			2		2		1	2		1	1	1	2						2		1	1
2023-11-23	Arba Minch zuria	Ch Chalba	5	1	0	1	1	0	0	0		2		2			2		2		2	2		2	2	4	1	1	0	3	0	1	2		2
2023-11-23	Arba Minch zuria	Ch Chalba	4	2	0	1	1	0	0	0		2		2			5		5		2	2		2	2	3	2						2		2
2023-11-23	Arba Minch zuria	Ch Chalba	3	2	0	1	1	0	0	0		2		2			8		8		2	2		1	1	1	2						2		2
2023-11-23	Arba Minch zuria	Ch Chalba	9	1	0	1	1	0	0	0		2		2			8		8		2	2		2	1	2	2						2		2
2023-11-23	Arba Minch zuria	Ch Chalba	3	1	3	1	1	0	0	0		2		1	5		8		8		2	2		2	2	2	2						2		2
2023-11-23	Arba Minch zuria	Ch Chalba	2	1	0	1	1	0	0	0		2		2			8		8		2	2		1	1	1	2						2		2
2023-11-23	Arba Minch zuria	Ch Chalba	3	1	2	1	1	0	0	0		2		1	5		8		8		2	2		3	2	3	2						2		2
2023-11-23	Arba Minch zuria	Ch Chalba	7	1	0	3	0	0	1	0		2		1	5		8		8		2	2		3	2	3	2						2		2
2023-11-23	Arba Minch zuria	Ch Chalba	4	1	4	1	1	0	0	0		2		1	5		8		8		2	2		3	2	4	2						2		2
2023-11-23	Arba Minch zuria	Ch Chalba	1	1	0	1	1	0	0	0		2		2			8		8		2	2		2	1	1	2						1	2	2
2023-11-23	Arba Minch zuria	Ch Chalba	4	2	0	1	1	0	0	0		2		1	5		8		8		2	2		2	2	1	2						2		2
2023-11-23	Arba Minch zuria	Ch Chalba	4	2	0	3	0	0	1	0		2		1	5		2		2		2	2		3	2	2	2						2		2
2023-11-23	Arba Minch zuria	Ch Chalba	4	1	3	1	1	0	0	0		2		1	5		5		2		2	2		2	2	3	1	1	1	2	0	0	2		1	2
2023-11-23	Arba Minch zuria	Ch Chalba	6	2	0	1	1	0	0	0		2		2			8		8		1	1	1	1	1	1	2						1	4	2
2023-11-23	Arba Minch zuria	Ch Chalba	4	1	2	1	1	0	0	0		2		1	5		2		2		2	2		3	2	4	1	1	0	2	0	0	1	1	1	2
2023-11-23	Arba Minch zuria	Ch Chalba	3	1	0	1	1	0	0	0		2		1	5		5		5		2	2		3	2	3	1	0	0	2	0	0	1	7	2
2023-11-23	Arba Minch zuria	Ch Chalba	3	1	0	1	1	0	0	0		2		1	5		5		2		2	2		1	1	1	2						2		2
2023-11-23	Arba Minch zuria	Ch Chalba	6	1	0	1	1	0	0	0		2		2			8		8		2	2		1	1	1	1	1	1	1	0	0	2		2
2023-11-23	Arba Minch zuria	Ch Chalba	1	2	0	1	1	0	0	0		2		2			8		8		2	2		1	1	1	2						2		2
2023-11-23	Arba Minch zuria	Ch Chalba	3	1	0	1	1	0	0	0		2		1	5		2		2		2	2		2	2	2	2						2		2
2023-11-23	Arba Minch zuria	Ch Chalba	3	1	2	1	1	0	0	0		2		2			8		9	Madaberia	2	2		2	1	2	1	0	1	0	0	0	2		2
2023-11-23	Arba Minch zuria	Ch Chalba	8	1	3	1	1	0	0	0		2		1	5		2		2		2	2		3	2	3	1	0	1	4	1	0	1	7	2
2023-11-23	Arba Minch zuria	Ch Chalba	1	1	1	1	1	0	0	0		2		2			8		8		2	2		1	1	1	2						2		2
2023-11-24	Arba Minch zuria	Ch Chalba	3	1	0	1	1	0	0	0		2		1	5		2		2		2	2		2	1	2	2						2		2
2023-11-24	Arba Minch zuria	Ch Chalba	4	1	0	1	1	0	0	0		2		2			8		8		2	2		1	1	1	2						1	2	2
2023-11-24	Arba Minch zuria	Ch Chalba	4	1	4	1	1	0	0	0		2		1	5		5		5		2	2		1	1	1	2						2		2
2023-11-29	Arba Minch zuria	Sile	5	1	5	1	1	0	0	0		1		2			5		5		2	2		1	1	0	1	1	0	1	0	0	2		2
2023-11-25	Arba Minch zuria	Ch Chalba	3	1	1	3	0	0	1	0		2		2			3		3		2	1	2	3	2	3	2						1	2	2
2023-11-29	Arba Minch zuria	Sile	3	2	0	3	0	0	1	0		2		2			5		1		2	2		2	1	2	1	1	0	4	0	0	2		2
2023-11-29	Arba Minch zuria	Sile	7	1	0	1	1	0	0	0		1		1	5		1		5		2	2		1	1	0	1	4	0	3	0	1	2		2
2023-11-29	Arba Minch zuria	Sile	5	1	3	1	1	0	0	0		2		2			5		5		2	2		2	2	3	2						2		2
2023-11-29	Arba Minch zuria	Sile	12	1	4	1	1	0	0	0		1		2			1		5		2	2		1	1	0	2						2		2
2023-11-29	Arba Minch zuria	Sile	3	1	3	1	1	0	0	0		1		1	5		1		5		2	2		1	1	0	1	5	0	1	0	0	2		2
2023-12-02	Arba Minch zuria	Sile	6	1	2	1	1	0	0	0		1		2			1		5		2	2		1	1	1	2						2		2
2023-11-30	Arba Minch zuria	Sile	4	2	0	1	1	0	0	0		1		2			1		5		2	2		1	1	0	2						1	2	2
2023-11-30	Arba Minch zuria	Sile	7	1	0	3	0	0	1	0		2		1	5		5		5		2	2		2	1	2	1	2	0	0	0	0	2		2
2023-11-30	Arba Minch zuria	Sile	3	1	3	3	0	0	1	0		2		2			5		5		2	2		2	1	2	1	2	0	0	0	0	2		2
2023-11-30	Arba Minch zuria	Sile	4	2	0	3	0	0	1	0		2		2			1		1		1	2		2	1	2	2						2		2
2023-11-30	Arba Minch zuria	Sile	6	2	0	1	1	0	0	0		1		2			1		2		2	2		1	1	0	2						1	4	2
2023-11-30	Arba Minch zuria	Sile	7	1	0	3	0	0	1	0		2		2			2		5		1	2		2	1	2	2						2		2
2023-12-01	Arba Minch zuria	Sile	1	1	0	1	1	0	0	0		1		2			1		5		2	2		1	1	1	2						2		2
2023-12-01	Arba Minch zuria	Sile	2	1	0	1	1	0	0	0		1		2			5		1		2	2		1	1	0	2						1	2	2
2023-12-01	Arba Minch zuria	Sile	5	1	0	1	1	0	0	0		1		2			1		5		2	2		1	1	0	2						2		2
2023-12-01	Arba Minch zuria	Sile	4	1	0	1	1	0	0	0		1		2			1		5		2	2		1	1	0	1	2	0	0	0	1	2		2
2023-12-01	Arba Minch zuria	Sile	3	1	0	3	0	0	1	0		2		2			5		5		2	2		2	1	2	1	2	0	0	0	0	2		2
2023-12-01	Arba Minch zuria	Sile	6	1	0	1	1	0	0	0		1		2			1		5		2	2		1	1	0	1	7	0	0	0	1	1	3	2
2023-12-01	Arba Minch zuria	Sile	3	1	3	1	1	0	0	0		1		2			1		5		2	2		1	1	0	1	3	0	0	0	1	2		2
2023-12-04	Arba Minch zuria	Sile	7	2	0	1	1	0	0	0		1		1	5		1		5		2	2		1	1	0	1	6	0	0	0	0	2		2
2023-12-04	Arba Minch zuria	Sile	8	1	6	3	0	0	1	0		2		1	5		6		2		2	2		3	2	3	1	4	0	0	0	1	2		2
2023-12-04	Arba Minch zuria	Sile	5	2	0	3	0	0	1	0		2		1	2		3		2		2	2		3	2	3	1	3	0	7	0	0	2		2
2023-12-04	Arba Minch zuria	Sile	8	1	2	3	0	0	1	0		2		1	2		3		2		2	1	1	3	2	3	1	3	0	4	0	0	2		2
2023-11-27	Arba Minch zuria	Ch Chalba	5	1	0	1	1	0	0	0		2		2			8		8		2	2		2	2	2	2						2		2
2023-11-25	Arba Minch zuria	Ch Chalba	2	1	1	1	1	0	0	0		2		1	5		2		2		2	2		3	2	4	1	0	0	0	2	0	2		2
2023-12-01	Arba Minch zuria	Sile	3	1	2	1	1	0	0	0		1		1	5		1		5		2	2		1	1	0	1	0	0	4	0	0	1	1	2
2023-12-01	Arba Minch zuria	Sile	5	1	5	1	1	0	0	0		1		1	5		1		5		2	2		1	1	0	1	4	0	0	0	0	1	3	2
2023-12-01	Arba Minch zuria	Sile	6	1	3	1 2 3	1	1	1	0		2		1	1		6		2		2	2		3	2	3	2						1	12	2
2023-12-01	Arba Minch zuria	Sile	1	2	0	3	0	0	1	0		2		1	5		6		5		2	2		1	1	1	2						2		2
2023-12-01	Arba Minch zuria	Sile	3	1	1	3	0	0	1	0		2		2			8		2		2	2		1	1	1	2						2		2
2023-12-01	Arba Minch zuria	Sile	3	1	3	3	0	0	1	0		2		1	5		8		5		2	2		1	1	1	2						2		2
2023-11-30	Arba Minch zuria	Sile	3	1	0	1	1	0	0	0		1		1	5		5		5		2	2		1	1	0	1	3	0	3	0	0	1	3	2
2023-11-30	Arba Minch zuria	Sile	5	1	0	1	1	0	0	0		1		2			5		5		2	2		1	1	0	1	5	0	4	0	1	1	12	2
2023-11-30	Arba Minch zuria	Sile	5	1	0	3	0	0	1	0		2		2			5		5		2	2		2	1	2	1	2	0	2	0	0	1	4	2
2023-11-30	Arba Minch zuria	Sile	5	1	2	3	0	0	1	0		2		2			5		5		2	2		2	1	2	1	5	0	0	0	1	2		2
2023-11-30	Arba Minch zuria	Sile	4	1	0	3	0	0	1	0		2		2			5		5		2	2		2	1	2	2						2		2
2023-11-30	Arba Minch zuria	Sile	4	2	0	3	0	0	1	0		2		2			5		5		2	2		2	1	2	2						2		2
2023-12-01	Arba Minch zuria	Sile	7	1	7	3	0	0	1	0		2		1	5		3		2		2	2		2	1	2	1	3	1	3	0	1	1	8	2
2023-12-01	Arba Minch zuria	Sile	4	1	0	1	1	0	0	0		1		1	5		5		9	በማደበርያ የተሸፈነ	2	2		1	1	0	1	1	0	0	0	0	1	4	2
2023-12-01	Arba Minch zuria	Sile	6	2	0	1	1	0	0	0		1		1	5		8		8		2	2		1	1	0	2						2		2
2023-12-01	Arba Minch zuria	Sile	6	1	5	1	1	0	0	0		1		1	5		8		8		2	2		1	1	0	1	2	0	0	0	0	1	2	2
2023-12-01	Arba Minch zuria	Sile	4	1	0	3	0	0	1	0		2		1	5		5		2		2	2		4	2	5	1	2	0	0	0	0	2		2
2023-12-01	Arba Minch zuria	Sile	3	1	0	3	0	0	1	0		2		1	5		5		2		2	2		2	2	3	1	1	0	2	0	0	2		2
2023-12-01	Arba Minch zuria	Sile	7	1	0	3	0	0	1	0		2		1	2		2		2		2	2		3	2	3	1	15	0	2	0	3	2		2
2023-12-02	Arba Minch zuria	Sile	1	1	0	3	0	0	1	0		2		2			6		2		2	2		1	1	1	2						2		2
2023-12-02	Arba Minch zuria	Sile	6	1	0	3	0	0	1	0		2		1	2		6		2		2	2		3	2	3	1	5	0	0	1	1	1	3	2
2023-12-02	Arba Minch zuria	Sile	3	2	0	2	0	1	0	0		2		1	2		3		2		2	2		3	2	4	1	5	0	6	0	0	2		2
2023-12-02	Arba Minch zuria	Sile	1	2	0	1	1	0	0	0		1		2			8		8		2	2		1	1	0	2						2		2
2023-12-02	Arba Minch zuria	Sile	4	1	4	3	0	0	1	0		2		2			6		5		2	2		1	1	1	2						2		2
2023-12-04	Arba Minch zuria	Sile	5	1	1	3	0	0	1	0		2		1	2		6		2		2	2		3	2	3	1	5	0	0	4	0	1	8	2
2023-12-04	Arba Minch zuria	Sile	5	1	0	3	0	0	1	0		2		2			6		2		2	2		4	2	3	2						2		2
2023-12-04	Arba Minch zuria	Sile	6	1	2	3	0	0	1	0		2		1	5		5		5		2	2		3	2	3	1	0	0	5	0	0	1	3	2
2023-12-04	Arba Minch zuria	Sile	5	1	3	3	0	0	1	0		2		1	5		5		2		2	2		3	2	3	2						2		2
2023-12-04	Arba Minch zuria	Sile	4	1	0	3	0	0	1	0		2		1	5		3		2		2	1	1	3	2	3	1	2	0	1	0	1	2		2
2023-12-04	Arba Minch zuria	Sile	6	1	0	3	0	0	1	0		2		1	5		3		2		2	2		3	2	3	1	6	0	3	0	1	2		2
2023-12-05	Arba Minch zuria	Sh Mella	5	1	2	1	1	0	0	0		1		2			8		5		2	2		1	1	0	2						2		2
2023-12-05	Arba Minch zuria	Sh Mella	8	1	1	3	0	0	1	0		2		1	5		3		2		2	2		3	2	3	1	2	0	1	0	0	2		2
2023-12-05	Arba Minch zuria	Sh Mella	5	1	0	1	1	0	0	0		1		2			5		5		2	2		1	1	0	1	7	0	0	0	0	1	1	2
2023-12-05	Arba Minch zuria	Sh Mella	5	1	0	1	1	0	0	0		1		2			5		5		2	2		1	1	0	2						2		2
2023-11-29	Arba Minch zuria	Sile	5	1	1	3	0	0	1	0		2		1	5		2		6		2	2		2	1	2	1	5	0	2	0	0	1	8	2
2023-11-30	Arba Minch zuria	Sile	2	2	0	3	0	0	1	0		2		2			5		5		2	2		2	1	2	2						2		2
2023-12-01	Arba Minch zuria	Sile	5	1	0	1	1	0	0	0		1		1	5		1		9	Be Madabara Yeteshefene	2	2		1	1	0	1	2	0	0	0	2	1	2	2
2023-12-01	Arba Minch zuria	Sile	2	1	2	1	1	0	0	0		1		2			5		1		2	2		1	1	0	2						2		2
2023-12-01	Arba Minch zuria	Sile	6	1	1	1	1	0	0	0		1		1	5		1		9	Bemdaberya Yeteshefene	2	2		1	1	0	1	7	0	2	0	1	2		2
2023-12-01	Arba Minch zuria	Sile	8	1	5	3	0	0	1	0		2		1	2		4		4		2	2		2	2	3	1	8	0	2	0	2	1	2	2
2023-12-04	Arba Minch zuria	Sile	6	1	3	3	0	0	1	0		2		2			5		9	Ashewa Girf	2	2		3	2	3	2						1	3	2
2023-12-04	Arba Minch zuria	Sile	7	1	2	1	1	0	0	0		1		2			5		5		2	2		1	1	0	2						2		2
2023-12-05	Arba Minch zuria	Sile	1	2	0	1	1	0	0	0		1		1	5		1		9	Chika Be Madaberiya Yeteshefene	2	2		1	1	0	1	1	0	1	0	0	2		2
2023-12-05	Arba Minch zuria	Sh Mella	4	1	3	1	1	0	0	0		1		1	5		1		5		2	2		1	1	0	1	6	0	0	2	0	2		2
2023-12-05	Arba Minch zuria	Sh Mella	6	1	1	1	1	0	0	0		1		2			1		5		2	1	1	1	1	0	1	10	0	1	0	4	1	4	2
2023-12-05	Arba Minch zuria	Sh Mella	8	1	4	1	1	0	0	0		2		2			5		5		2	2		3	2	3	1	3	0	0	0	0	2		2
2023-12-05	Arba Minch zuria	Sh Mella	8	1	2	3	0	0	1	0		2		1	5		2		2		2	2		3	2	3	1	3	0	0	0	0	1	4	2
2023-12-05	Arba Minch zuria	Sh Mella	4	1	4	1	1	0	0	0		2		2			5		5		2	2		2	1	2	1	2	0	3	0	0	2		2
2023-12-05	Arba Minch zuria	Sh Mella	6	1	2	1	1	0	0	0		1		2			8		8		2	2		1	1	0	1	5	0	11	1	2	1	15	2
2023-12-06	Arba Minch zuria	Sh Mella	7	1	0	1	1	0	0	0		1		1	5		5		5		2	2		1	1	0	1	3	0	0	0	0	2		2
2023-12-06	Arba Minch zuria	Sh Mella	4	1	0	1	1	0	0	0		1		2			5		5		2	2		1	1	0	1	4	0	0	0	0	2		2
2023-12-06	Arba Minch zuria	Sh Mella	3	1	1	1	1	0	0	0		2		1	5		2		2		2	2		2	1	2	2						2		2
2023-12-06	Arba Minch zuria	Sh Mella	3	1	3	3	0	0	1	0		2		1	5		2		2		2	2		2	2	2	2						1	19	2
2023-12-06	Arba Minch zuria	Sh Mella	6	1	2	3	0	0	1	0		2		1	5		2		2		2	2		3	2	2	2						2		2
2023-12-06	Arba Minch zuria	Sh Mella	6	2	0	1	1	0	0	0		2		1	5		2		2		2	2		2	2	2	1	3	0	0	0	0	2		2
2023-12-06	Arba Minch zuria	Sh Mella	3	1	3	1	1	0	0	0		2		1	5		5		2		2	2		2	2	2	2						2		2
2023-12-06	Arba Minch zuria	Sh Mella	2	1	0	3	0	0	1	0		2		1	5		2		2		2	2		2	2	2	2						2		2
2023-12-07	Arba Minch zuria	Sh Mella	5	1	2	1	1	0	0	0		2		1	5		2		2		1	2		2	2	2	2						2		2
2023-12-07	Arba Minch zuria	Sh Mella	3	1	0	1	1	0	0	0		2		1	5		2		2		2	2		3	1	1	2						2		2
2023-12-07	Arba Minch zuria	Sh Mella	3	1	3	3	0	0	1	0		2		1	5		2		2		2	2		4	3	3	2						1	3	2
2023-12-07	Arba Minch zuria	Sh Mella	4	1	1	1	1	0	0	0		2		1	5		2		2		2	2		2	2	2	2						2		2
2023-12-07	Arba Minch zuria	Sh Mella	5	1	1	1	1	0	0	0		2		1	5		2		2		2	2		2	2	2	1	1	0	0	0	0	2		2
2023-12-07	Arba Minch zuria	Sh Mella	8	1	3	1	1	0	0	0		2		1	5		2		2		2	2		2	1	2	1	3	0	0	0	0	2		2
2023-12-08	Arba Minch zuria	Sh Mella	3	1	2	1	1	0	0	0		2		2			5		5		2	2		2	2	2	1	5	0	0	0	1	1	2	2
2023-12-08	Arba Minch zuria	Sh Mella	4	1	0	1	1	0	0	0		2		2			5		5		2	2		1	1	1	1	2	0	0	0	1	2		2
2023-12-08	Arba Minch zuria	Sh Mella	3	2	0	1	1	0	0	0		2		1	5		2		2		2	2		2	2	2	2						1	1	2
2023-12-08	Arba Minch zuria	Sh Mella	8	1	4	1	1	0	0	0		2		2			8		8		2	2		3	2	2	2						2		2
2023-12-08	Arba Minch zuria	Sh Mella	4	1	2	1	1	0	0	0		2		1	5		2		2		2	2		2	1	2	1	4	0	2	0	1	1	5	2
2023-12-08	Arba Minch zuria	Sh Mella	7	1	3	1	1	0	0	0		1		2			8		8		2	2		1	1	0	1	5	0	0	0	1	2		2
2023-12-08	Arba Minch zuria	Sh Mella	7	1	0	3	0	0	1	0		2		2			5		5		2	2		1	1	1	2						1	1	2
2023-12-08	Arba Minch zuria	Sh Mella	4	1	2	1	1	0	0	0		2		2			2		2		2	2		2	2	2	2						2		2
2023-12-08	Arba Minch zuria	Sh Mella	6	1	6	1	1	0	0	0		1		1	5		8		8		2	2		1	1	0	1	5	0	0	4	0	1	2	2
2023-12-09	Arba Minch zuria	Sh Mella	5	1	1	3	0	0	1	0		2		1	2		2		2		2	2		3	2	3	1	3	0	5	0	1	1	3	2
2023-12-09	Arba Minch zuria	Sh Mella	3	1	3	3	0	0	1	0		2		1	5		2		2		2	2		3	2	2	2						2		2
2023-12-09	Arba Minch zuria	Sh Mella	1	1	0	1	1	0	0	0		2		2			5		5		2	2		2	1	2	2						2		2
2023-12-09	Arba Minch zuria	Sh Mella	4	1	4	1	1	0	0	0		2		1	5		5		5		2	2		3	2	1	2						2		2
2023-12-27	Arba Minch zuria	Sh Mella	4	1	4	3	0	0	1	0		2		1	5		2		2		2	2		3	2	3	1	1	0	0	0	0	2		2
2023-12-27	Arba Minch zuria	Sh Mella	5	2	0	3	0	0	1	0		2		1	5		2		2		2	2		3	2	3	1	1	0	0	0	0	1	9	2
2023-12-06	Arba Minch zuria	Sh Mella	7	1	2	1	1	0	0	0		2		2			5		5		2	2		3	2	3	1	3	0	0	0	1	2		2
2023-12-06	Arba Minch zuria	Sh Mella	5	1	3	1	1	0	0	0		2		1	5		5		5		2	2		2	1	2	1	3	0	0	0	0	2		2
2023-12-06	Arba Minch zuria	Sh Mella	7	1	7	3	0	0	1	0		2		1	5		2		2		2	2		3	2	3	1	2	0	0	0	0	1	6	2
2023-12-06	Arba Minch zuria	Sh Mella	7	2	0	3	0	0	1	0		2		1	2		2		2		2	2		4	2	2	2						1	5	2
2023-12-07	Arba Minch zuria	Sh Mella	4	1	4	1	1	0	0	0		2		1	5		2		2		2	2		2	2	2	1	2	0	0	0	0	2		2
2023-12-07	Arba Minch zuria	Sh Mella	3	1	1	1	1	0	0	0		2		1	5		2		2		2	2		2	2	2	1	3	0	0	0	1	1	1	2
2023-12-07	Arba Minch zuria	Sh Mella	6	1	4	1	1	0	0	0		2		1	5		2		2		2	2		2	2	2	2						2		2
2023-12-07	Arba Minch zuria	Sh Mella	3	1	0	1	1	0	0	0		2		1	5		2		2		2	2		1	2	2	2						2		2
2023-12-07	Arba Minch zuria	Sh Mella	2	1	0	3	0	0	1	0		2		1	2		3		2		2	2		2	1	2	1	6	0	3	2	2	1	2	2
2023-12-07	Arba Minch zuria	Sh Mella	8	1	4	1	1	0	0	0		2		1	5		2		2		2	2		2	2	2	2						2		2
2023-12-07	Arba Minch zuria	Sh Mella	8	1	0	1	1	0	0	0		2		1	5		5		5		2	2		2	1	2	2						2		2
2023-12-07	Arba Minch zuria	Sh Mella	5	1	4	1	1	0	0	0		2		1	5		2		2		2	2		3	2	3	2						2		2
2023-12-08	Arba Minch zuria	Sh Mella	1	1	0	3	0	0	1	0		2		1	4		2		2		2	2		3	2	3	2						2		2
2023-12-08	Arba Minch zuria	Sh Mella	7	1	0	1	1	0	0	0		2		1	5		2		2		2	2		2	2	2	1	4	0	0	0	1	2		2
2023-12-08	Arba Minch zuria	Sh Mella	3	1	3	3	0	0	1	0		2		1	5		2		2		2	2		1	2	1	2						1	2	2
2023-12-08	Arba Minch zuria	Sh Mella	6	1	4	3	0	0	1	0		2		1	5		3		2		2	2		2	2	2	1	7	0	0	0	3	1	2	2
2023-12-08	Arba Minch zuria	Sh Mella	7	1	6	1	1	0	0	0		2		1	5		5		5		2	2		2	1	2	1	5	0	0	0	2	1	2	2
2023-12-08	Arba Minch zuria	Sh Mella	4	1	4	1	1	0	0	0		2		1	5		5		2		2	2		3	2	4	1	4	0	0	0	2	2		2
2023-12-08	Arba Minch zuria	Sh Mella	4	1	0	3	0	0	1	0		2		1	5		5		5		2	2		1	1	1	1	4	3	0	0	1	2		2
2023-12-27	Arba Minch zuria	Sh Mella	10	2	0	3	0	0	1	0		2		2			1		3		2	2		4	2	4	1	3	0	1	0	1	2		2
2023-12-27	Arba Minch zuria	Sh Mella	4	1	1	1	1	0	0	0		1		2			2		2		2	2		1	1	0	2						2		2
2023-12-27	Arba Minch zuria	Sh Mella	3	1	3	1	1	0	0	0		2		2			2		2		2	2		1	1	1	2						2		2
2023-12-27	Arba Minch zuria	Sh Mella	3	1	3	1	1	0	0	0		2		2			2		2		2	2		1	1	1	1	3	0	3	0	0	2		2
2023-12-27	Arba Minch zuria	Sh Mella	6	1	6	1	1	0	0	0		1		2			2		2		2	2		1	1	0	1	1	0	0	0	0	2		2
2023-12-27	Arba Minch zuria	Sh Mella	1	1	1	1	1	0	0	0		2		2			2		2		2	2		1	1	2	2						2		2
2023-12-27	Arba Minch zuria	Sh Mella	2	1	1	1	1	0	0	0		2		1	5		2		2		2	2		3	2	3	2						2		2
2023-12-28	Arba Minch zuria	Sh Mella	6	1	6	1	1	0	0	0		2		1	5		2		2		2	2		3	2	3	1	4	0	0	2	0	2		2
2023-12-28	Arba Minch zuria	Sh Mella	5	1	4	1	1	0	0	0		2		2			8		8		2	2		1	1	1	2						2		2
2023-12-28	Arba Minch zuria	Sh Mella	6	1	2	1	1	0	0	0		2		2			8		8		2	2		1	1	1	2						2		2
2023-12-28	Arba Minch zuria	Sh Mella	5	1	5	1	1	0	0	0		2		2			8		8		2	2		1	1	1	1	3	0	0	0	1	1	8	2
2023-12-29	Arba Minch zuria	Sh Mella	3	1	2	3	0	0	1	0		2		2			8		8		2	2		1	1	1	2						2		2
2023-12-29	Arba Minch zuria	Sh Mella	3	1	2	3	0	0	1	0		2		1	5		2		2		2	2		3	2	3	1	2	0	0	0	0	2		2
2023-12-29	Arba Minch zuria	Sh Mella	3	1	3	1	1	0	0	0		2		2			8		8		2	2		2	1	2	2						2		2
2023-12-29	Arba Minch zuria	Sh Mella	4	1	2	1	1	0	0	0		1		2			1		8		1	2		0	1	0	1	1	0	0	0	0	1	3	2
2023-12-10	Arba Minch zuria	Sh Mella	5	1	2	1	1	0	0	0		2		2			5		5		2	2		2	2	2	2						2		2
2023-12-30	Arba Minch zuria	Sh Mella	3	2	0	1	1	0	0	0		2		2			1		8		2	2		2	1	1	2						1	2	2
2023-12-30	Arba Minch zuria	Sh Mella	6	1	3	1	1	0	0	0		2		1	5		5		5		2	2		3	2	3	1	5	0	1	0	0	1	6	2
2023-12-08	Arba Minch zuria	Sh Mella	7	1	3	1	1	0	0	0		2		2			5		5		2	2		2	2	2	1	1	0	0	0	0	2		2
2023-12-08	Arba Minch zuria	Sh Mella	8	1	5	1	1	0	0	0		2		2			5		5		2	2		2	1	2	1	3	0	3	0	1	1	1	2
2023-12-08	Arba Minch zuria	Sh Mella	4	1	4	1	1	0	0	0		2		1	5		2		2		2	2		2	1	2	1	4	0	0	0	2	2		2
2023-12-08	Arba Minch zuria	Sh Mella	4	1	4	1	1	0	0	0		2		1	5		2		2		2	2		1	1	1	2						2		2
2023-12-09	Arba Minch zuria	Sh Mella	5	1	2	1	1	0	0	0		2		1	5		2		2		2	2		3	2	4	1	3	0	0	0	0	2		2
2023-12-09	Arba Minch zuria	Sh Mella	5	1	0	3	0	0	1	0		2		1	2		2		2		2	2		3	2	3	1	10	2	4	0	2	1	10	2
2023-12-09	Arba Minch zuria	Sh Mella	7	1	0	3	0	0	1	0		2		1	3		3		9	Be ciqana gypsum hono kelem yetekeba	2	2		3	2	3	1	20	0	10	0	0	2		2
2023-12-09	Arba Minch zuria	Sh Mella	6	1	0	1	1	0	0	0		2		1	5		2		2		2	2		3	2	3	1	4	0	0	0	2	2		2
2023-12-09	Arba Minch zuria	Sh Mella	1	1	1	1	1	0	0	0		2		2			2		2		2	2		2	1	2	2						2		2
2023-12-09	Arba Minch zuria	Sh Mella	7	1	2	1	1	0	0	0		2		1	5		2		2		2	2		3	2	3	1	5	1	3	0	0	1	2	2
2023-12-09	Arba Minch zuria	Sh Mella	6	2	0	1	1	0	0	0		2		1	5		5		5		2	2		3	2	3	1	5	0	0	0	2	1	1	2
2023-12-27	Arba Minch zuria	Sh Mella	10	1	0	3	0	0	1	0		2		2			5		5		2	2		1	1	1	2						2		2
2023-12-27	Arba Minch zuria	Sh Mella	3	1	0	1	1	0	0	0		2		2			5		5		2	2		2	1	2	1	1	0	0	0	0	2		2
2023-12-27	Arba Minch zuria	Sh Mella	7	1	0	1	1	0	0	0		2		1	5		2		2		2	2		3	2	3	1	2	0	0	0	0	1	2	2
2023-12-27	Arba Minch zuria	Sh Mella	5	1	5	1	1	0	0	0		2		2			5		2		2	2		3	2	3	2						2		2
2023-12-27	Arba Minch zuria	Sh Mella	7	1	2	1	1	0	0	0		2		1	5		2		2		2	2		2	1	2	2						1	3	2
2023-12-27	Arba Minch zuria	Sh Mella	2	1	0	1	1	0	0	0		2		2			5		2		2	2		1	1	1	1	1	0	2	0	0	2		2
2023-12-27	Arba Minch zuria	Sh Mella	5	1	4	1	1	0	0	0		1		2			5		5		2	2		1	1	1	1	0	0	5	0	0	1	0	2
2023-12-27	Arba Minch zuria	Sh Mella	6	1	0	1	1	0	0	0		2		2			1		8		2	2		2	1	2	2						2		2
2023-12-28	Arba Minch zuria	Sh Mella	7	1	7	1	1	0	0	0		1		2			5		5		2	2		1	1	1	1	1	0	0	0	0	2		2
2023-12-28	Arba Minch zuria	Sh Mella	4	1	4	1	1	0	0	0		1		2			8		8		2	2		2	1	2	1	1	0	1	0	0	2		2
2023-12-28	Arba Minch zuria	Sh Mella	6	1	0	3	0	0	1	0		2		2			5		5		2	2		3	2	3	1	4	1	0	0	0	2		2
2023-12-28	Arba Minch zuria	Sh Mella	9	1	3	1	1	0	0	0		2		1	5		2		2		2	2		3	2	3	2						2		2
2023-12-28	Arba Minch zuria	Sh Mella	4	1	3	1	1	0	0	0		2		1	5		5		5		2	2		2	1	2	2						2		2
2023-12-28	Arba Minch zuria	Sh Mella	7	1	3	1	1	0	0	0		2		1	5		2		2		2	2		3	2	3	2						2		2
2023-12-28	Arba Minch zuria	Sh Mella	6	1	6	1	1	0	0	0		2		2			5		5		2	2		3	2	3	2						2		2
2023-12-28	Arba Minch zuria	Sh Mella	5	1	4	1	1	0	0	0		2		2			5		5		2	2		3	2	3	2						2		2
2023-12-29	Arba Minch zuria	Sh Mella	5	1	5	1	1	0	0	0		1		2			5		5		2	2		1	1	0	1	4	0	0	0	1	2		2
2023-12-29	Arba Minch zuria	Sh Mella	7	1	3	1	1	0	0	0		2		2			8		8		2	2		3	2	3	1	1	0	0	0	0	2		2
2023-12-29	Arba Minch zuria	Sh Mella	7	1	3	1	1	0	0	0		1		2			5		5		2	2		1	1	0	1	1	0	0	0	0	2		2
2023-12-29	Arba Minch zuria	Sh Mella	3	1	0	1	1	0	0	0		1		2			5		5		2	2		1	1	0	2						2		2
2023-12-29	Arba Minch zuria	Sh Mella	5	1	2	1	1	0	0	0		2		1	5		5		5		2	2		2	1	2	1	3	1	1	0	0	2		2
2023-12-29	Arba Minch zuria	Sh Mella	3	1	3	1	1	0	0	0		2		2			8		8		2	2		1	1	1	2						2		2
2023-12-29	Arba Minch zuria	Sh Mella	8	1	2	1	1	0	0	0		1		2			8		8		2	2		1	1	0	1	10	0	0	0	2	2		2
2023-12-29	Arba Minch zuria	Sh Mella	3	1	3	1	1	0	0	0		2		2			5		5		2	2		3	2	3	2						1	1	2
2023-12-30	Arba Minch zuria	Sh Mella	4	2	0	1	1	0	0	0		2		2			5		5		2	2		1	1	1	2						2		2
2023-12-30	Arba Minch zuria	Sh Mella	3	1	2	1	1	0	0	0		2		2			8		8		2	2		3	1	2	1	0	0	0	2	0	1	10	2
2023-12-27	Arba Minch zuria	Sh Mella	2	1	0	1	1	0	0	0		2		2			8		8		2	2		2	1	2	2						1	2	2
2023-12-27	Arba Minch zuria	Sh Mella	7	1	4	1	1	0	0	0		2		2			8		8		1	2		1	1	1	2						1	1	2
2023-12-27	Arba Minch zuria	Sh Mella	4	1	4	1	1	0	0	0		2		2			8		8		2	2		1	1	1	2						2		2
2023-12-27	Arba Minch zuria	Sh Mella	7	1	6	3	0	0	1	0		2		2			2		2		2	2		2	1	2	1	1	0	0	0	0	1	2	2
2023-12-28	Arba Minch zuria	Sh Mella	2	1	0	1	1	0	0	0		2		2			8		9	Chika yaltelefe	2	2		2	2	1	2						2		2
2023-12-28	Arba Minch zuria	Sh Mella	4	1	4	1	1	0	0	0		2		2			8		8		2	2		3	2	3	1	0	1	0	0	0	2		2
2023-12-28	Arba Minch zuria	Sh Mella	6	1	4	1	1	0	0	0		2		2			8		8		2	2		3	2	3	1	0	0	1	0	0	1	3	2
2023-12-28	Arba Minch zuria	Sh Mella	8	1	7	3	0	0	1	0		2		1	5		2		2		2	2		3	2	3	1	5	0	0	0	2	1	2	2
2023-12-28	Arba Minch zuria	Sh Mella	5	1	0	1	1	0	0	0		2		2			5		5		2	2		3	2	3	2						2		2
2023-12-28	Arba Minch zuria	Sh Mella	6	1	3	1	1	0	0	0		2		2			8		8		2	2		3	2	2	2						2		2
2023-12-28	Arba Minch zuria	Sh Mella	5	2	0	1	1	0	0	0		2		2			8		8		2	2		2	2	3	2						2		2
2023-12-28	Arba Minch zuria	Sh Mella	4	1	4	1	1	0	0	0		1		2			8		8		2	2		1	1	0	2						2		2
2023-12-28	Arba Minch zuria	Sh Mella	5	1	5	1	1	0	0	0		2		2			8		8		2	2		1	1	1	2						2		2
2023-12-29	Arba Minch zuria	Sh Mella	5	1	4	3	0	0	1	0		2		2			8		8		2	2		3	2	3	1	2	0	0	0	0	1	1	2
2023-12-29	Arba Minch zuria	Sh Mella	5	1	5	1	1	0	0	0		2		1	5		2		2		2	2		3	2	3	1	9	0	0	0	3	2		2
2023-12-29	Arba Minch zuria	Sh Mella	6	1	3	1	1	0	0	0		1		2			8		8		2	2		1	1	0	1	0	0	2	0	0	2		2
2023-12-29	Arba Minch zuria	Sh Mella	4	1	0	1	1	0	0	0		2		2			8		8		1	2		2	1	2	1	1	0	0	0	0	2		2
2023-12-29	Arba Minch zuria	Sh Mella	4	1	1	1	1	0	0	0		2		2			8		8		1	2		3	2	3	2						2		2
2023-12-30	Arba Minch zuria	Sh Mella	4	1	3	3	0	0	1	0		2		2			8		8		2	2		3	2	3	2						2		2
2023-12-30	Arba Minch zuria	Sh Mella	5	1	5	1	1	0	0	0		2		1	5		2		2		2	2		3	2	3	2						2		2
2023-12-30	Arba Minch zuria	Sh Mella	1	1	1	1	1	0	0	0		2		1	5		2		2		2	2		3	2	3	2						1	2	2
2024-01-11	Arba Minch zuria	K Shelle	6	1	0	3	0	0	1	0		2		2			8		8		2	2		3	2	2	1	2	1	3	0	1	1	2	2
2024-01-11	Arba Minch zuria	K Shelle	5	2	0	3	0	0	1	0		2		2			2		2		2	2		3	2	3	2						2		2
2024-01-11	Arba Minch zuria	K Shelle	7	1	2	3	0	0	1	0		2		1	5		3		3		2	2		3	2	2	2						2		2
2024-01-11	Arba Minch zuria	K Shelle	9	1	0	1	1	0	0	0		2		2			5		5		2	2		3	2	3	1	1	0	0	0	0	2		2
2024-01-11	Arba Minch zuria	K Shelle	8	2	0	1	1	0	0	0		2		1	5		2		2		2	2		3	2	3	1	1	0	0	0	0	2		2
2024-01-11	Arba Minch zuria	K Shelle	11	1	3	3	0	0	1	0		2		1	2		3		2		2	2		3	2	3	1	10	1	3	0	5	2		2
2024-01-11	Arba Minch zuria	K Shelle	9	1	2	3	0	0	1	0		2		1	2		3		2		2	2		3	2	3	1	10	3	6	0	3	1	4	2
2024-01-11	Arba Minch zuria	K Shelle	7	1	6	1	1	0	0	0		2		2			5		5		2	2		3	2	2	2						2		2
2024-01-11	Arba Minch zuria	K Shelle	4	1	3	1	1	0	0	0		2		2			5		5		2	2		1	1	1	2						2		2
2024-01-11	Arba Minch zuria	K Shelle	4	1	3	1	1	0	0	0		2		2			5		5		2	2		3	2	3	1	2	0	0	0	1	2		2
2024-01-11	Arba Minch zuria	K Shelle	9	1	2	3	0	0	1	0		2		1	4		3		3		2	2		3	2	2	1	3	0	0	2	1	2		2
2024-01-12	Arba Minch zuria	K Shelle	6	2	0	1	1	0	0	0		2		2			2		2		2	2		2	2	2	2						2		2
2024-01-12	Arba Minch zuria	K Shelle	7	2	0	1	1	0	0	0		1		2			5		5		2	2		1	1	0	1	1	0	0	0	0	2		2
2024-01-12	Arba Minch zuria	K Shelle	9	1	0	1	1	0	0	0		2		2			5		5		2	2		3	2	3	1	2	0	3	0	0	1	3	2
2024-01-12	Arba Minch zuria	K Shelle	5	2	0	1	1	0	0	0		2		2			5		5		2	2		3	2	3	2						2		2
2024-01-12	Arba Minch zuria	K Shelle	3	2	0	1	1	0	0	0		2		2			8		8		2	2		2	2	3	2						2		2
2024-01-12	Arba Minch zuria	K Shelle	8	2	0	3	0	0	1	0		2		2			5		5		2	2		3	2	3	2						2		2
2024-01-12	Arba Minch zuria	K Shelle	4	2	0	3	0	0	1	0		2		2			8		8		2	2		2	1	2	2						2		2
2023-12-30	Arba Minch zuria	Sh Mella	4	1	4	1	1	0	0	0		2		2			8		8		2	2		3	2	3	2						2		2
2023-12-30	Arba Minch zuria	Sh Mella	3	1	2	1	1	0	0	0		2		2			8		8		2	2		2	2	2	1	5	0	0	0	2	2		2
2024-01-11	Arba Minch zuria	K Shelle	6	2	0	3	0	0	1	0		2		1	2		3		2		2	2		3	2	3	1	5	0	0	0	2	2		2
2024-01-11	Arba Minch zuria	K Shelle	4	1	0	3	0	0	1	0		2		1	5		2		2		2	2		3	2	3	1	2	0	0	0	0	2		2
2024-01-11	Arba Minch zuria	K Shelle	1	2	0	2	0	1	0	0		2		1	5		2		2		2	2		1	1	1	2						2		2
2024-01-11	Arba Minch zuria	K Shelle	6	1	0	3	0	0	1	0		2		1	5		2		2		2	2		1	1	1	2						2		2
2024-01-11	Arba Minch zuria	K Shelle	6	1	2	3	0	0	1	0		2		2			8		8		2	2		3	2	3	1	2	0	1	0	0	2		2
2024-01-11	Arba Minch zuria	K Shelle	7	1	4	1	1	0	0	0		2		1	5		8		8		2	2		3	1	3	2						1	2	2
2024-01-11	Arba Minch zuria	K Shelle	6	1	0	3	0	0	1	0		2		1	2		8		2		2	2		4	2	3	2						2		2
2024-01-12	Arba Minch zuria	K Shelle	4	2	0	1	1	0	0	0		2		2			8		8		2	2		1	1	1	1	1	1	0	0	0	2		2
2024-01-12	Arba Minch zuria	K Shelle	2	2	0	1	1	0	0	0		2		2			8		8		2	2		1	1	1	1	2	0	0	0	0	2		2
2024-01-12	Arba Minch zuria	K Shelle	2	2	0	1	1	0	0	0		2		2			8		8		2	2		1	1	1	1	0	0	2	0	0	2		2
2024-01-12	Arba Minch zuria	K Shelle	6	2	0	1	1	0	0	0		2		1	5		2		2		2	2		3	2	3	2						1	5	2
2024-01-12	Arba Minch zuria	K Shelle	3	1	0	1	1	0	0	0		2		2			8		8		2	2		3	2	3	2						2		2
2024-01-12	Arba Minch zuria	K Shelle	3	2	0	1	1	0	0	0		2		2			8		8		2	2		3	2	3	2						1	3	2
2024-01-12	Arba Minch zuria	K Shelle	8	2	0	1	1	0	0	0		2		1	2		2		2		2	2		3	2	3	1	1	0	0	0	0	2		2
2024-01-12	Arba Minch zuria	K Shelle	3	2	0	1	1	0	0	0		2		2			8		8		2	2		3	3	1	2						2		2
2024-01-11	Arba Minch zuria	K Shelle	4	2	0	1	1	0	0	0		2		2			5		5		2	2		3	2	3	1	3	1	0	0	0	2		2
2024-01-11	Arba Minch zuria	K Shelle	6	2	0	3	0	0	1	0		2		2			8		8		2	2		3	3	2	2						2		2
2024-01-11	Arba Minch zuria	K Shelle	6	1	0	3	0	0	1	0		2		1	5		2		2		2	2		3	2	3	1	2	0	1	0	1	1	5	2
2024-01-11	Arba Minch zuria	K Shelle	4	1	4	1	1	0	0	0		2		2			8		8		2	2		3	2	3	2						2		2
2024-01-11	Arba Minch zuria	K Shelle	6	1	5	1	1	0	0	0		2		1	5		2		2		2	2		3	2	3	2						2		2
2024-01-11	Arba Minch zuria	K Shelle	8	1	7	1	1	0	0	0		2		1	5		2		2		2	2		3	2	3	1	1	0	1	0	0	2		2
2024-01-12	Arba Minch zuria	K Shelle	9	2	0	3	0	0	1	0		2		2			5		5		2	2		3	2	3	2						1	2	2
2024-01-12	Arba Minch zuria	K Shelle	8	2	0	1	1	0	0	0		2		1	5		2		2		2	2		3	2	3	2						1	2	2
2024-01-12	Arba Minch zuria	K Shelle	7	1	0	1	1	0	0	0		1		2			8		8		2	2		1	1	0	1	3	0	3	0	1	2		2
2024-01-12	Arba Minch zuria	K Shelle	6	2	0	3	0	0	1	0		2		2			8		8		1	2		3	2	3	1	3	0	2	0	0	2		2
2024-01-12	Arba Minch zuria	K Shelle	4	2	0	3	0	0	1	0		2		1	2		2		2		2	2		3	2	3	1	3	0	1	4	1	2		2
2024-01-12	Arba Minch zuria	K Shelle	8	2	0	1	1	0	0	0		2		2			5		5		2	2		3	2	3	2						1	6	2
2024-01-12	Arba Minch zuria	K Shelle	4	2	0	1	1	0	0	0		1		2			8		8		2	2		1	1	0	1	2	0	2	0	1	2		2
2024-01-12	Arba Minch zuria	K Shelle	2	2	0	1	1	0	0	0		2		1	5		2		2		2	2		1	1	1	2						2		2
2024-01-12	Arba Minch zuria	K Shelle	4	2	0	1	1	0	0	0		2		1	5		2		2		2	2		2	1	2	2						2		2
2024-01-12	Arba Minch zuria	K Shelle	7	1	2	1	1	0	0	0		2		1	5		2		8		2	2		3	2	3	1	1	0	1	0	0	2		2
2024-01-12	Arba Minch zuria	K Shelle	5	1	0	1	1	0	0	0		2		2			8		8		2	2		3	2	3	1	2	0	0	0	1	2		2
2024-01-13	Arba Minch zuria	K Shelle	8	2	0	1	1	0	0	0		1		2			1		8		2	2		1	1	0	1	6	0	0	0	1	2		2
2024-01-13	Arba Minch zuria	K Shelle	12	1	0	3	0	0	1	0		2		1	2		2		2		2	2		3	2	3	1	4	0	4	0	3	1	2	2
2024-01-13	Arba Minch zuria	K Shelle	7	1	3	1	1	0	0	0		2		2			8		8		2	2		3	2	3	1	4	0	0	0	2	2		2
2024-01-13	Arba Minch zuria	K Shelle	4	1	1	3	0	0	1	0		2		1	2		2		2		2	2		3	2	3	1	2	0	0	0	1	2		2
2024-01-13	Arba Minch zuria	K Shelle	9	1	0	3	0	0	1	0		2		1	2		6		5		2	2		3	2	3	1	15	1	0	0	2	2		2
2024-01-13	Arba Minch zuria	K Shelle	1	1	0	1	1	0	0	0		2		2			2		2		2	2		3	2	3	1	2	0	0	0	1	2		2
2024-01-13	Arba Minch zuria	K Shelle	9	1	2	1	1	0	0	0		2		1	5		2		2		1	2		3	2	3	1	5	0	0	0	1	2		2
2024-01-13	Arba Minch zuria	K Shelle	4	1	0	1	1	0	0	0		2		2			1		8		2	2		1	1	1	2						2		2
2024-01-13	Arba Minch zuria	K Shelle	5	1	0	1	1	0	0	0		2		2			1		8		2	2		1	1	1	1	1	0	0	0	0	2		2
2024-01-13	Arba Minch zuria	K Shelle	5	1	0	1	1	0	0	0		2		1	5		2		2		2	2		3	2	3	1	3	0	0	0	1	2		2
2024-01-16	Arba Minch zuria	K Shelle	6	1	0	3	0	0	1	0		2		2			5		5		2	2		3	2	3	1	2	0	0	3	0	1	5	2
2024-01-16	Arba Minch zuria	K Shelle	6	1	3	1	1	0	0	0		2		2			5		5		2	2		1	1	1	1	2	0	1	0	0	2		2
2024-01-16	Arba Minch zuria	K Shelle	5	1	1	3	0	0	1	0		2		2			8		8		2	2		1	1	1	1	1	0	0	0	0	2		2
2024-01-16	Arba Minch zuria	K Shelle	6	1	3	1	1	0	0	0		2		2			5		5		2	2		3	2	3	1	0	0	0	2	0	2		2
2024-01-16	Arba Minch zuria	K Shelle	8	1	3	1	1	0	0	0		2		1	5		8		2		2	2		3	2	3	1	3	0	0	2	0	1	3	2
2024-01-16	Arba Minch zuria	K Shelle	1	1	0	1	1	0	0	0		2		2			8		8		2	2		3	2	3	1	0	0	0	5	0	1	2	2
2024-01-12	Arba Minch zuria	K Shelle	5	1	2	1	1	0	0	0		2		1	5		2		2		2	2		3	2	3	2						1	2	2
2024-01-13	Arba Minch zuria	K Shelle	6	1	3	3	0	0	1	0		2		1	2		3		3		2	2		3	2	3	1	7	0	1	0	0	2		2
2024-01-13	Arba Minch zuria	K Shelle	3	2	0	3	0	0	1	0		2		2			5		5		2	2		2	2	1	2						2		2
2024-01-13	Arba Minch zuria	K Shelle	6	1	0	3	0	0	1	0		2		2			5		5		2	2		1	1	1	1	18	0	16	0	2	1	4	2
2024-01-13	Arba Minch zuria	K Shelle	4	1	2	1	1	0	0	0		2		2			8		8		2	2		1	1	1	1	5	0	0	0	2	1	1	2
2024-01-13	Arba Minch zuria	K Shelle	5	1	0	1	1	0	0	0		2		2			5		2		2	2		2	1	2	2						1	6	2
2024-01-13	Arba Minch zuria	K Shelle	8	1	0	3	0	0	1	0		2		2			5		5		2	2		3	2	3	1	7	0	2	0	1	1	3	2
2024-01-13	Arba Minch zuria	K Shelle	2	2	0	1	1	0	0	0		2		2			5		5		2	2		1	1	1	2						2		2
2024-01-13	Arba Minch zuria	K Shelle	3	2	0	1	1	0	0	0		2		1	5		5		2		2	2		1	1	1	2						2		2
2024-01-13	Arba Minch zuria	K Shelle	2	1	0	1	1	0	0	0		2		2			5		5		2	2		1	1	1	2						2		2
2024-01-13	Arba Minch zuria	K Shelle	5	1	0	3	0	0	1	0		2		2			8		8		2	2		2	2	2	1	7	1	0	1	1	1	3	2
2024-01-15	Arba Minch zuria	K Shelle	3	2	0	1	1	0	0	0		2		2			8		8		1	2		2	1	2	2						2		2
2024-01-15	Arba Minch zuria	K Shelle	3	2	0	1	1	0	0	0		2		2			5		5		2	2		1	1	1	1	5	0	0	0	0	2		2
2024-01-15	Arba Minch zuria	K Shelle	3	1	2	1	1	0	0	0		1		2			8		8		2	2		1	1	0	1	2	0	0	0	1	2		2
2024-01-15	Arba Minch zuria	K Shelle	6	2	0	1	1	0	0	0		2		2			5		5		2	2		3	2	3	1	1	0	0	0	0	2		2
2024-01-15	Arba Minch zuria	K Shelle	8	1	0	3	0	0	1	0		2		2			6		5		2	2		3	2	3	1	2	0	2	2	0	2		2
2024-01-15	Arba Minch zuria	K Shelle	8	1	2	1	1	0	0	0		2		2			5		5		2	2		3	2	3	1	2	0	0	6	1	1	4	2
2024-01-15	Arba Minch zuria	K Shelle	9	1	3	1	1	0	0	0		2		2			5		5		2	2		3	2	3	2						2		2
2024-01-15	Arba Minch zuria	K Shelle	5	2	0	1	1	0	0	0		1		2			8		8		2	2		1	1	0	1	2	0	0	5	0	1	4	2
2024-01-15	Arba Minch zuria	K Shelle	4	1	0	1	1	0	0	0		2		2			5		5		2	2		3	2	3	1	0	0	0	4	0	2		2
2024-01-16	Arba Minch zuria	K Shelle	4	1	3	3	0	0	1	0		2		1	5		2		2		2	2		3	2	3	2						1	1	2
2024-01-16	Arba Minch zuria	K Shelle	5	1	0	1	1	0	0	0		1		1	5		8		8		2	1	1	1	1	0	1	0	0	1	5	0	1	3	2
2024-01-16	Arba Minch zuria	K Shelle	10	1	4	1	1	0	0	0		2		2			5		5		2	2		3	2	2	1	3	0	0	0	1	2		2
2024-01-16	Arba Minch zuria	K Shelle	5	1	5	1	1	0	0	0		2		2			5		5		2	2		3	2	3	1	2	0	2	7	0	1	2	2
2024-01-16	Arba Minch zuria	K Shelle	6	1	3	1	1	0	0	0		1		2			8		8		2	2		1	1	0	1	1	0	11	3	0	1	7	2
2024-01-16	Arba Minch zuria	K Shelle	6	1	6	1	1	0	0	0		1		2			8		8		1	2		1	1	0	1	2	0	1	5	1	2		2
2024-01-16	Arba Minch zuria	K Shelle	8	1	6	3	0	0	1	0		2		2			6		5		2	2		3	2	3	2						2		2
2024-01-16	Arba Minch zuria	K Shelle	4	1	4	1	1	0	0	0		1		2			8		8		2	2		1	1	0	1	5	0	5	0	1	1	6	2
2024-01-16	Arba Minch zuria	K Shelle	4	1	1	1	1	0	0	0		1		2			8		8		2	2		1	1	0	2						2		2
2024-01-17	Arba Minch zuria	K Shelle	1	2	0	1	1	0	0	0		2		1	5		8		8		2	2		1	1	1	2						2		2
2024-01-17	Arba Minch zuria	K Shelle	4	1	4	1	1	0	0	0		2		2			5		5		2	2		3	2	3	1	1	0	0	0	0	2		2
2024-01-17	Arba Minch zuria	K Shelle	1	2	0	1	1	0	0	0		2		2			5		5		2	2		1	1	1	2						2		2
2024-01-17	Arba Minch zuria	K Shelle	6	2	0	1	1	0	0	0		2		2			5		5		2	2		2	1	2	2						2		2
2024-01-17	Arba Minch zuria	K Shelle	10	1	9	1	1	0	0	0		2		2			5		5		2	2		3	2	3	1	3	0	3	5	1	1	2	2
2024-01-19	Arba Minch zuria	K Shelle	4	1	2	1	1	0	0	0		2		2			5		5		2	2		3	2	3	1	2	0	0	0	0	2		2
2023-12-05	Arba Minch zuria	Sh Mella	7	1	7	1	1	0	0	0		2		1	5		2		2		2	2		3	2	3	2						2		2
2023-12-05	Arba Minch zuria	Sh Mella	5	1	2	1	1	0	0	0		1		2			5		5		2	1	1	1	1	0	1	2	0	0	0	1	2		2
2023-12-05	Arba Minch zuria	Sh Mella	6	1	3	1	1	0	0	0		2		2			5		5		1	2		2	1	2	2						2		2
2023-12-05	Arba Minch zuria	Sh Mella	6	1	3	3	0	0	1	0		2		2			5		2		2	2		5	2	3	1	7	2	13	0	2	1	12	2
2023-12-06	Arba Minch zuria	Sh Mella	4	1	4	1	1	0	0	0		2		1	5		5		2		2	2		2	2	1	2						2		2
2023-12-06	Arba Minch zuria	Sh Mella	5	1	0	3	0	0	1	0		2		1	1		2		2		2	2		3	3	3	1	8	0	4	0	0	2		2
2024-01-15	Arba Minch zuria	K Shelle	6	1	1	1	1	0	0	0		2		2			8		8		2	2		3	2	3	2						2		2
2024-01-16	Arba Minch zuria	K Shelle	6	1	4	2	0	1	0	0		2		1	5		6		5		2	2		3	2	3	2						2		2
2024-01-16	Arba Minch zuria	K Shelle	7	1	6	1	1	0	0	0		2		2			5		5		2	2		3	2	1	1	2	0	0	3	0	2		2
2024-01-12	Arba Minch zuria	K Shelle	8	2	0	1	1	0	0	0		1		2			1		1		2	2		1	1	0	1	4	1	0	0	0	2		2
2024-01-12	Arba Minch zuria	K Shelle	2	1	0	1	1	0	0	0		2		2			8		8		2	2		2	1	2	2						2		2
2024-01-12	Arba Minch zuria	K Shelle	7	2	0	1	1	0	0	0		2		1	5		5		2		2	2		3	2	3	1	6	0	8	0	0	2		2
2024-01-13	Arba Minch zuria	K Shelle	4	1	4	3	0	0	1	0		2		2			5		5		2	2		1	1	1	2						2		2
2024-01-13	Arba Minch zuria	K Shelle	8	1	8	3	0	0	1	0		2		1	5		2		2		2	2		3	2	3	1	4	0	0	0	2	2		2
2024-01-13	Arba Minch zuria	K Shelle	8	1	2	3	0	0	1	0		2		2			5		5		2	2		3	2	3	2						2		2
2024-01-13	Arba Minch zuria	K Shelle	2	1	2	1	1	0	0	0		2		2			5		5		2	2		1	1	1	1	5	0	0	0	1	2		2
2024-01-13	Arba Minch zuria	K Shelle	7	2	0	3	0	0	1	0		2		1	5		2		2		2	2		3	2	3	1	5	0	0	0	1	1	3	2
2024-01-13	Arba Minch zuria	K Shelle	4	1	1	1	1	0	0	0		2		2			5		5		2	2		3	2	3	1	2	0	0	3	0	1	1	2
2024-01-13	Arba Minch zuria	K Shelle	3	1	0	1	1	0	0	0		2		2			5		5		2	2		3	2	3	1	2	0	0	0	0	1	3	2
2024-01-13	Arba Minch zuria	K Shelle	4	1	0	1	1	0	0	0		2		2			2		2		2	2		2	2	2	2						2		2
2024-01-13	Arba Minch zuria	K Shelle	7	1	0	1	1	0	0	0		2		2			5		5		2	2		2	2	2	1	1	0	0	3	0	1	2	2
2024-01-15	Arba Minch zuria	K Shelle	2	1	0	1	1	0	0	0		2		1	5		5		2		2	2		2	2	2	1	2	0	0	0	0	2		2
2024-01-15	Arba Minch zuria	K Shelle	2	1	0	1	1	0	0	0		2		2			5		5		2	2		2	2	2	2						2		2
2024-01-15	Arba Minch zuria	K Shelle	6	1	2	3	0	0	1	0		2		1	2		3		2		2	2		3	2	3	1	4	0	1	2	1	2		2
2024-01-15	Arba Minch zuria	K Shelle	3	1	2	1	1	0	0	0		1		2			5		5		2	2		1	1	0	1	2	0	0	0	0	2		2
2024-01-15	Arba Minch zuria	K Shelle	7	1	0	3	0	0	1	0		2		1	5		6		6		2	2		3	2	3	1	4	0	0	3	1	1	6	2
2024-01-15	Arba Minch zuria	K Shelle	7	1	3	3	0	0	1	0		2		1	5		6		2		2	2		3	2	3	1	3	0	0	2	0	2		2
2024-01-15	Arba Minch zuria	K Shelle	7	1	0	3	0	0	1	0		2		1	5		6		2		2	2		3	2	3	1	1	0	1	4	0	1	6	2
2024-01-15	Arba Minch zuria	K Shelle	5	1	0	1	1	0	0	0		2		2			5		5		2	2		2	2	2	1	1	0	0	4	0	1	6	2
2024-01-15	Arba Minch zuria	K Shelle	7	1	0	1	1	0	0	0		2		2			5		5		2	2		3	2	3	1	1	0	0	2	0	2		2
2024-01-15	Arba Minch zuria	K Shelle	9	2	0	3	0	0	1	0		2		1	2		3		3		2	2		3	2	3	1	3	1	2	1	0	1	10	2
2024-01-15	Arba Minch zuria	K Shelle	2	2	0	1	1	0	0	0		2		2			8		8		2	2		2	1	2	1	0	0	0	3	0	2		2
2024-01-15	Arba Minch zuria	K Shelle	5	1	2	1	1	0	0	0		2		2			8		8		2	2		3	2	3	1	2	0	0	0	0	1	1	2
2024-01-16	Arba Minch zuria	K Shelle	7	1	7	3	0	0	1	0		2		2			5		6		2	2		3	2	3	1	2	0	0	3	0	1	3	2
2024-01-16	Arba Minch zuria	K Shelle	7	1	2	1	1	0	0	0		1		2			5		5		2	2		1	1	0	1	2	0	0	1	1	1	1	2
2024-01-16	Arba Minch zuria	K Shelle	6	1	5	3	0	0	1	0		2		1	5		3		2		2	2		3	2	3	1	3	0	2	3	0	1	6	2
2024-01-16	Arba Minch zuria	K Shelle	6	1	4	3	0	0	1	0		2		2			5		5		2	2		3	2	3	1	2	0	2	6	0	1	3	2
2024-01-16	Arba Minch zuria	K Shelle	4	1	0	1	1	0	0	0		1		2			5		5		2	2		1	1	1	2						1	3	2
2024-01-17	Arba Minch zuria	K Shelle	6	1	1	1	1	0	0	0		2		1	5		2		2		2	2		3	2	3	1	1	0	0	2	0	2		2
2024-01-17	Arba Minch zuria	K Shelle	4	1	4	1	1	0	0	0		2		2			5		5		2	2		3	2	3	1	1	0	0	0	0	1	1	2
2024-01-17	Arba Minch zuria	K Shelle	4	1	0	1	1	0	0	0		2		2			2		5		2	2		3	3	3	1	2	0	0	0	0	2		2
2024-01-17	Arba Minch zuria	K Shelle	4	1	4	1	1	0	0	0		2		2			5		5		2	2		3	2	3	2						1	1	2
2023-08-01	Mirab Abaya	Delbo	7	1		1	1	0	0	0		2		2			2		2		2	2		1	1	1	2						2		2
2023-08-05	Mirab Abaya	Delbo	1	2	0	1	1	0	0	0		2		2			2		2		2	2		1	1	1	2						2		2
2023-08-05	Mirab Abaya	Delbo	4	2	0	1	1	0	0	0		2		2			5		5		2	2		1	1	1	2						2		2
2023-08-05	Mirab Abaya	Delbo	3	2	0	1	1	0	0	0		2		2			8		8		2	2		1	1	1	2						2		2
2023-08-05	Mirab Abaya	Delbo	4	1	3	1	1	0	0	0		2		2			1		1		1	2		1	1	0	2						1	1	2
2023-08-08	Mirab Abaya	Delbo	3	1	0	1	1	0	0	0		2		1	5		2		5		2	2		1	1	1	2						2		2
2023-08-08	Mirab Abaya	Delbo	2	2	0	1	1	0	0	0		2		2			1		8		2	2		1	1	1	2						2		2
2023-08-08	Mirab Abaya	Delbo	3	1	0	1	1	0	0	0		2		1	5		2		2		2	2		2	1	2	2						2		2
2023-08-09	Mirab Abaya	Delbo	4	2	0	1	1	0	0	0		2		1	5		2		2		2	2		2	2	1	2						2		2
2023-08-09	Mirab Abaya	Delbo	4	2	0	1	1	0	0	0		2		1	5		2		2		2	2		2	2	2	2						2		2
2023-08-09	Mirab Abaya	Delbo	4	2	0	1	1	0	0	0		2		2			5		5		2	2		1	1	1	2						2		2
2023-08-09	Mirab Abaya	Delbo	5	2	0	1	1	0	0	0		2		2			8		8		2	2		2	1	2	2						2		2
2023-08-09	Mirab Abaya	Delbo	2	2	0	1	1	0	0	0		2		2			2		2		2	2		1	1	1	2						2		2
2023-08-10	Mirab Abaya	Alge	5	1	5	1	1	0	0	0		1		2			1		8		2	2		1	1	0	2						1	1	2
2023-08-10	Mirab Abaya	Alge	3	1	2	1	1	0	0	0		2		2			5		5		2	2		1	1	1	2						2		2
2023-08-10	Mirab Abaya	Alge	4	1	2	1	1	0	0	0		2		2			5		5		2	2		1	1	1	2						2		2
2023-08-10	Mirab Abaya	Alge	4	1	0	1	1	0	0	0		1		2			1		5		1	1	2	1	1	0	2						1	2	2
2023-08-10	Mirab Abaya	Alge	4	2	0	1	1	0	0	0		1		2			1		5		2	2		1	1	0	2						2		2
2023-08-10	Mirab Abaya	Alge	5	2	0	1	1	0	0	0		1		2			1		5		1	2		1	1	0	2						2		2
2023-08-10	Mirab Abaya	Alge	14	1	4	1	1	0	0	0		2		2			1		8		2	2		3	2	3	1	0	0	1	0	0	1	4	2
2023-08-11	Mirab Abaya	Alge	2	2	0	3	0	0	1	0		2		1	5		5		2		2	2		1	1	0	2						2		2
2023-08-11	Mirab Abaya	Alge	7	1	0	3	0	0	1	0		2		2			1		5		2	2		3	2	2	1	1	1	8	0	0	1	1	2
2023-08-11	Mirab Abaya	Alge	10	1	7	1	1	0	0	0		2		2			8		8		2	2		3	2	3	1	0	0	7	0	0	1	1	2
2023-08-11	Mirab Abaya	Alge	8	1	7	1	1	0	0	0		1		2			1		8		2	2		1	1	0	1	1	0	3	0	1	2		2
2023-08-12	Mirab Abaya	Alge	3	2	0	3	0	0	1	0		2		2			5		5		2	2		2	1	3	1	5	0	0	0	2	1	2	2
2023-08-12	Mirab Abaya	Alge	6	2	0	1	1	0	0	0		2		2			8		8		2	2		3	2	3	2						1	1	2
2023-08-12	Mirab Abaya	Alge	5	2	0	1	1	0	0	0		2		2			1		8		2	2		2	1	2	2						1	1	2
2023-08-12	Mirab Abaya	Alge	6	1	4	1	1	0	0	0		2		2			8		8		2	2		3	2	3	2						1	4	2
2023-08-12	Mirab Abaya	Alge	3	1	3	1	1	0	0	0		2		2			8		8		2	2		1	1	1	2						2		2
2023-08-17	Mirab Abaya	Delbo	10	1	7	1	1	0	0	0		2		1	5		2		2		2	2		3	2	4	1	5	0	3	0	0	1	8	2
2023-08-17	Mirab Abaya	Delbo	6	2	0	1	1	0	0	0		2		1	5		2		2		2	2		3	2	3	2						2		2
2023-08-18	Mirab Abaya	Delbo	2	2	0	3	0	0	1	0		2		1	5		5		2		2	2		1	1	1	2						2		2
2023-08-18	Mirab Abaya	Delbo	3	2	0	1	1	0	0	0		2		1	5		5		5		2	2		2	1	2	2						2		2
2023-08-18	Mirab Abaya	Delbo	1	1	1	1	1	0	0	0		2		2			5		5		2	2		1	1	1	2						2		2
2023-08-18	Mirab Abaya	Delbo	4	1	4	3	0	0	1	0		2		1	5		2		2		2	2		3	2	3	1	1	0	0	0	0	1	4	2
2023-08-21	Mirab Abaya	Mole	5	2	0	1	1	0	0	0		2		1	5		8		8		2	2		3	2	2	1	0	0	2	0	0	2		2
2023-08-21	Mirab Abaya	Mole	8	1	2	1	1	0	0	0		2		2			8		8		2	2		3	2	3	2						1	1	2
2023-08-22	Arba Minch zuria	Lante	2	1	2	3	0	0	1	0		2		2			2		2		2	2		3	4	5	2						1	3	2
2023-08-22	Arba Minch zuria	Lante	2	2	0	3	0	0	1	0		2		2			2		2		2	2		1	1	1	2						2		1	2
2023-08-22	Arba Minch zuria	Lante	3	2	0	1	1	0	0	0		2		2			2		2		2	2		1	1	1	2						2		2
2023-08-21	Mirab Abaya	Mole	2	2	0	1	1	0	0	0		2		1	5		2		5		2	2		1	1	1	1	0	1	0	0	0	2		2
2023-08-22	Mirab Abaya	Mole	3	1	3	1	1	0	0	0		2		1	5		8		8		2	2		2	2	2	2						2		2
2023-08-22	Mirab Abaya	Mole	4	2	0	1	1	0	0	0		2		2			8		8		2	2		2	2	2	2						2		2
2023-08-21	Mirab Abaya	Mole	4	2	0	3	0	0	1	0		2		2			5		5		2	2		1	1	1	2						2		2
2023-08-21	Mirab Abaya	Mole	2	2	0	3	0	0	1	0		2		2			5		5		2	2		1	1	1	2						2		2
2023-08-21	Mirab Abaya	Mole	1	2	0	3	0	0	1	0		2		2			5		5		2	2		1	1	1	2						2		2
2023-08-22	Arba Minch zuria	Lante	1	1	1	1	1	0	0	0		2		2			5		5		2	2		1	1	2	2						1	2	2
2023-08-22	Arba Minch zuria	Lante	4	1	4	1	1	0	0	0		2		1	5		5		2		2	2		1	1	1	2						2		2
2023-08-22	Mirab Abaya	Mole	6	1	0	1	1	0	0	0		2		1	5		5		5		2	2		1	2	2	1	3	0	0	0	1	1	3	2
2023-08-22	Mirab Abaya	Mole	5	1	2	1	1	0	0	0		2		2			5		5		2	2		2	2	2	2						1	8	2
2023-08-22	Mirab Abaya	Mole	5	1	0	1	1	0	0	0		1		2			1		1		1	1	2	1	1	0	2						1	5	2
2023-08-22	Mirab Abaya	Mole	8	1	2	1	1	0	0	0		2		1	5		8		8		2	2		3	2	2	1	2	1	1	0	1	1	4	2
2023-08-22	Mirab Abaya	Mole	5	1	0	1	1	0	0	0		2		1	5		8		8		2	2		2	2	2	1	2	0	6	0	0	1	1	2
2023-08-23	Arba Minch zuria	Lante	3	1	3	3	0	0	1	0		2		2			5		5		2	2		1	1	1	2						2		2
2023-08-23	Arba Minch zuria	Lante	1	1	0	3	0	0	1	0		2		2			2		2		2	2		1	1	1	2						2		2
2023-08-23	Arba Minch zuria	Lante	2	1	2	1	1	0	0	0		2		1	5		2		2		2	2		1	1	1	2						2		2
2023-08-23	Arba Minch zuria	Lante	1	1	1	1	1	0	0	0		2		1	5		2		2		2	2		1	1	1	2						2		2
2023-08-24	Mirab Abaya	Mole	4	2	0	1	1	0	0	0		2		2			1		8		1	2		2	1	2	2						2		2
2023-08-24	Mirab Abaya	Mole	3	1	0	3	0	0	1	0		2		2			5		5		2	2		1	1	1	2						2		2
2023-08-24	Arba Minch zuria	Lante	5	1	4	1	1	0	0	0		2		2			2		2		1	1	2	2	1	2	2						2		2
2023-08-24	Arba Minch zuria	Lante	4	1	3	1	1	0	0	0		2		1	5		2		2		2	2		2	1	2	2						2		2
2023-08-24	Mirab Abaya	Mole	2	1	0	1	1	0	0	0		2		2			1		8		2	2		2	1	2	2						2		2
2023-08-25	Mirab Abaya	Mole	2	1	0	1	1	0	0	0		2		2			8		8		2	2		2	2	2	2						2		2
2023-08-25	Mirab Abaya	Mole	6	1	0	1	1	0	0	0		2		1	3		2		2		2	2		3	2	3	1	0	1	0	0	0	1	11	2
2023-08-24	Mirab Abaya	Mole	4	2	0	3	0	0	1	0		2		1	5		2		2		2	2		1	1	1	2						2		2
2023-08-24	Mirab Abaya	Mole	11	1	0	3	0	0	1	0		2		1	5		2		2		2	2		3	2	4	1	0	0	5	0	0	1	5	2
2023-08-24	Mirab Abaya	Mole	8	2	0	2	0	1	0	0		2		2			5		5		2	2		2	1	2	2						1	2	2
2023-08-24	Mirab Abaya	Mole	4	2	0	1	1	0	0	0		2		1	5		1		8		2	2		1	1	1	2						2		2
2023-08-24	Mirab Abaya	Mole	5	1	2	1	1	0	0	0		2		2			8		8		1	2		3	2	3	2						2		2
2023-08-25	Mirab Abaya	Mole	3	2	0	1	1	0	0	0		2		2			1		8		2	2		3	2	3	2						1	2	2
2023-08-25	Mirab Abaya	Mole	2	1	0	1	1	0	0	0		2		2			1		8		2	2		1	1	1	2						1	5	2
2023-08-25	Mirab Abaya	Mole	1	1	0	3	0	0	1	0		2		2			5		5		2	2		1	2	3	2						2		2
2023-08-24	Mirab Abaya	Mole	3	1	2	3	0	0	1	0		2		1	5		5		2		2	2		1	1	1	2						2		2
2023-08-25	Mirab Abaya	Mole	3	1	0	1	1	0	0	0		2		1	5		1		8		2	2		2	1	2	2						1	5	2
2023-08-28	Mirab Abaya	U Lante	3	2	0	3	0	0	1	0		2		2			2		2		2	2		1	1	1	2						2		2
2023-08-26	Arba Minch zuria	Lante	3	2	0	1	1	0	0	0		2		2			8		8		2	2		2	2	2	2						2		2
2023-08-26	Arba Minch zuria	Lante	2	1	0	1	1	0	0	0		2		1	5		5		5		2	2		2	1	2	2						2		2
2023-08-28	Mirab Abaya	U Lante	2	2	0	1	1	0	0	0		2		2			2		2		2	2		1	1	1	2						1	2	2
2023-08-28	Mirab Abaya	U Lante	2	1	0	1	1	0	0	0		2		2			2		2		2	2		2	2	2	2						2		2
2023-08-28	Mirab Abaya	U Lante	1	1	1	4	0	0	0	1	Yelem	3	Kachina yelewm	2			8		8		2	2		1	1	1	2						2		2
2023-08-28	Mirab Abaya	U Lante	4	2	0	1	1	0	0	0		2		2			8		8		2	2		1	1	1	2						2		2
2023-08-28	Mirab Abaya	U Lante	2	2	0	1	1	0	0	0		2		2			8		8		2	2		1	1	1	2						2		2
2023-08-28	Mirab Abaya	U Lante	1	2	0	1	1	0	0	0		2		2			8		8		2	2		1	1	1	2						2		2
2023-08-28	Mirab Abaya	U Lante	4	2	0	1	1	0	0	0		2		2			8		8		2	2		1	1	1	2						2		2
2023-08-29	Mirab Abaya	U Lante	4	1	0	3	0	0	1	0		2		1	5		2		2		2	2		1	1	1	2						1	1	2
2023-08-29	Mirab Abaya	U Lante	4	1	3	3	0	0	1	0		2		1	5		2		2		2	2		1	1	1	2						1	2	2
2023-08-29	Mirab Abaya	U Lante	4	1	4	1	1	0	0	0		2		1	5		2		2		2	2		1	1	1	2						2		2
2023-08-29	Mirab Abaya	U Lante	5	1	5	3	0	0	1	0		2		1	5		2		2		2	2		1	1	1	2						1	5	2
2023-08-29	Mirab Abaya	U Lante	2	2	0	1	1	0	0	0		2		1	5		2		2		2	2		1	1	1	2						2		2
2023-08-29	Mirab Abaya	U Lante	3	2	0	1	1	0	0	0		2		1	5		8		8		2	2		1	1	1	1	1	0	2	0	0	2		2
2023-08-29	Mirab Abaya	Ankober	4	2	0	1	1	0	0	0		2		2			8		8		2	2		2	1	2	2						2		2
2023-08-30	Mirab Abaya	U Lante	2	1	2	1	1	0	0	0		2		2			2		2		2	2		1	1	1	2						2		2
2023-08-30	Mirab Abaya	U Lante	4	1	4	1	1	0	0	0		2		1	5		8		8		2	2		1	1	1	2						2		2
2023-08-30	Mirab Abaya	U Lante	3	1	0	3	0	0	1	0		2		2			8		8		2	2		1	1	1	2						2		2
2023-08-30	Mirab Abaya	U Lante	6	1	0	1	1	0	0	0		2		2			8		8		2	2		3	2	3	1	2	0	3	0	0	2		2
2023-08-30	Mirab Abaya	U Lante	4	2	0	1	1	0	0	0		2		2			5		5		2	2		1	1	1	2						2		2
2023-08-30	Mirab Abaya	U Lante	5	1	0	3	0	0	1	0		2		2			5		5		2	2		1	1	2	2						2		2
2023-08-30	Mirab Abaya	Ankober	2	2	0	1	1	0	0	0		2		1	5		2		5		2	2		1	1	1	2						2		2
2023-08-30	Mirab Abaya	Ankober	3	2	0	1	1	0	0	0		2		1	5		8		8		2	2		1	1	1	1	0	0	4	0	0	1	1	2
2023-08-30	Mirab Abaya	Ankober	3	2	0	1	1	0	0	0		2		2			8		8		2	2		1	1	1	2						2		2
2023-08-30	Mirab Abaya	Ankober	2	2	0	1	1	0	0	0		2		1	5		8		8		2	2		2	1	1	2						2		2
2023-08-30	Mirab Abaya	Ankober	3	2	0	3	0	0	1	0		2		1	5		8		8		2	2		1	1	1	2						2		2
2023-08-30	Mirab Abaya	U Lante	4	1	0	1	1	0	0	0		2		2			8		8		2	2		1	1	1	2						2		2
2023-08-30	Mirab Abaya	Ankober	6	2	0	3	0	0	1	0		2		1	1		2		2		2	2		3	2	3	2						2		2
2023-08-30	Mirab Abaya	Ankober	4	2	0	1	1	0	0	0		2		1	5		2		2		2	2		3	2	2	2						2		2
2023-08-30	Mirab Abaya	Ankober	3	2	0	1	1	0	0	0		2		1	5		2		2		2	2		2	1	2	2						2		2
2023-08-30	Mirab Abaya	Ankober	9	1	0	1	1	0	0	0		2		2			5		5		2	2		2	2	2	1	1	0	1	0	0	1	2	2
2023-08-30	Mirab Abaya	Ankober	3	1	0	1	1	0	0	0		2		2			8		8		2	2		2	1	2	2						2		2
2023-08-30	Mirab Abaya	Ankober	2	2	0	3	0	0	1	0		2		1	5		2		2		2	2		2	2	2	2						2		2
2023-08-31	Mirab Abaya	U Lante	2	2	0	1	1	0	0	0		2		1	5		2		2		2	2		1	1	1	2						2		2
2023-08-31	Mirab Abaya	U Lante	3	1	0	1	1	0	0	0		2		2			5		5		2	2		2	2	2	1	0	0	3	0	0	1	4	2
2023-08-31	Mirab Abaya	Ankober	2	2	0	1	1	0	0	0		2		1	5		8		8		2	2		2	1	2	2						2		2
2023-08-31	Mirab Abaya	Ankober	3	1	0	1	1	0	0	0		2		2			8		8		2	2		1	1	1	2						2		2
2023-08-31	Mirab Abaya	Ankober	3	1	0	1	1	0	0	0		2		2			8		8		2	2		3	2	3	1	1	1	1	0	0	1	5	2
2023-08-31	Mirab Abaya	Ankober	5	1	0	3	0	0	1	0		2		2			8		8		2	2		3	2	2	2						2		2
2023-08-31	Mirab Abaya	Ankober	4	1	0	1	1	0	0	0		2		2			8		8		2	2		1	1	2	1	0	0	2	0	0	1	4	2
2023-08-31	Mirab Abaya	Ankober	3	1	0	3	0	0	1	0		2		2			8		8		2	2		1	1	1	2						2		2
2023-09-01	Mirab Abaya	Ankober	3	1	0	1	1	0	0	0		2		2			8		8		2	2		2	1	1	2						2		2
2023-08-31	Mirab Abaya	Ankober	2	2	0	3	0	0	1	0		2		1	5		2		2		2	2		1	1	1	2						2		2
2023-08-31	Mirab Abaya	Ankober	8	1	0	1	1	0	0	0		2		2			5		5		2	2		4	2	3	2						2		2
2023-09-01	Mirab Abaya	Ankober	7	2	0	1	1	0	0	0		2		1	5		2		2		2	2		3	2	3	2						1	4	2
2023-09-01	Mirab Abaya	U Lante	7	2	0	1	1	0	0	0		2		2			5		5		2	2		1	1	1	2						2		2
2023-09-01	Mirab Abaya	Fura	6	2	0	1	1	0	0	0		2		2			5		5		2	2		3	2	3	1	4	0	0	0	0	2		2
2023-09-01	Mirab Abaya	Ankober	11	2	0	1	1	0	0	0		2		1	5		5		2		2	2		6	5	6	2						2		2
2023-09-01	Mirab Abaya	Ankober	6	1	0	3	0	0	1	0		2		1	5		2		2		2	2		3	2	2	1	1	0	0	0	0	1	4	2
2023-09-02	Mirab Abaya	Fura	2	2	0	1	1	0	0	0		2		2			8		8		2	2		1	1	1	2						2		2
2023-09-02	Mirab Abaya	Fura	3	2	0	1	1	0	0	0		2		2			8		8		2	2		1	1	1	2						2		2
2023-09-02	Mirab Abaya	Fura	2	1	0	1	1	0	0	0		2		2			2		2		2	2		1	1	1	2						2		2
2023-09-02	Mirab Abaya	Ankober	3	1	3	1	1	0	0	0		2		2			8		8		2	2		1	1	1	1	1	0	0	0	0	2		2
2023-09-04	Mirab Abaya	Fura	2	2	0	1	1	0	0	0		2		2			5		5		2	2		1	1	1	2						2		2
2023-09-04	Mirab Abaya	Fura	2	2	0	1	1	0	0	0		2		2			5		5		2	2		1	1	1	2						2		2
2023-09-04	Mirab Abaya	Fura	3	1	3	3	0	0	1	0		2		1	5		5		5		2	2		1	1	2	2						2		2
2023-09-04	Mirab Abaya	Fura	5	1	5	3	0	0	1	0		2		2			2		2		2	2		1	1	1	2						2		2
2023-09-04	Mirab Abaya	Fura	3	1	3	1	1	0	0	0		2		2			8		8		2	2		1	1	1	2						2		2
2023-09-04	Mirab Abaya	Fura	1	1	1	3	0	0	1	0		2		1	1		2		2		2	2		2	2	2	2						1	2	2
2023-09-05	Mirab Abaya	Fura	1	2	0	1	1	0	0	0		2		2			8		8		2	2		1	1	1	2						2		2
2023-09-05	Mirab Abaya	Fura	4	1	4	1	1	0	0	0		2		1	5		8		8		2	2		2	1	3	2						2		2
2023-09-19	Mirab Abaya	Fura	4	1	2	1	1	0	0	0		2		2			2		2		2	2		1	1	1	2						1	12	2
2023-09-19	Mirab Abaya	Fura	2	2	0	1	1	0	0	0		2		2			2		2		2	2		1	1	1	2						2		2
2023-09-20	Mirab Abaya	Fura	2	2	0	1	1	0	0	0		2		2			2		2		2	2		1	1	1	2						2		2
2023-09-20	Mirab Abaya	Fura	5	2	0	3	0	0	1	0		2		2			2		2		2	2		1	1	2	2						2		2
2023-09-20	Mirab Abaya	Fura	4	2	0	3	0	0	1	0		2		2			2		2		2	2		1	1	1	2						2		2
2023-09-21	Arba Minch zuria	Ch Mile	4	1	4	1	1	0	0	0		2		2			8		8		2	2		3	2	4	1	0	1	2	0	0	1	13	1	2
2023-09-21	Arba Minch zuria	Ch Mile	5	1	5	1	1	0	0	0		2		2			2		2		2	2		1	1	1	2						2		2
2023-09-21	Arba Minch zuria	Ch Mile	4	1	0	1	1	0	0	0		2		1	5		5		5		2	2		2	2	2	1	0	0	1	0	0	1	3	1	2
2023-09-22	Arba Minch zuria	K Shelle	4	1	3	1	1	0	0	0		2		2			2		2		2	2		1	1	1	2						2		2
2023-09-22	Arba Minch zuria	Ch Mile	3	1	3	1	1	0	0	0		2		1	5		5		5		2	2		1	1	1	2						2		2
2023-09-23	Arba Minch zuria	Ch Mile	3	1	3	3	0	0	1	0		2		1	5		5		5		2	2		2	1	2	2						2		2
2023-09-23	Arba Minch zuria	Ch Mile	5	1	5	1	1	0	0	0		2		2			2		2		2	2		1	1	1	2						2		2
2023-09-25	Arba Minch zuria	Ch Chalba	1	2	0	3	0	0	1	0		2		2			5		5		2	2		1	1	1	2						2		2
2023-09-25	Arba Minch zuria	Ch Chalba	4	1	4	1	1	0	0	0		2		2			5		5		2	2		2	1	2	2						1	2	2
2023-09-25	Arba Minch zuria	Ch Chalba	2	1	2	1	1	0	0	0		2		1	5		2		2		2	2		1	1	1	2						2		2
2023-09-25	Arba Minch zuria	Ch Chalba	4	1	4	1	1	0	0	0		3	Yelem	2			2		2		2	2		2	2	2	2						2		2
2023-09-25	Arba Minch zuria	Ch Chalba	6	1	2	1	1	0	0	0		2		1	5		2		2		2	2		2	1	2	2						1	2	2
2023-09-25	Arba Minch zuria	Ch Chalba	4	2	0	1	1	0	0	0		2		1	5		8		8		2	2		1	1	0	2						1	2	2
2023-09-25	Arba Minch zuria	Ch Chalba	3	1	3	1	1	0	0	0		2		2			1		2		2	2		1	1	1	2						2		2
2023-11-22	Arba Minch zuria	Ch Chalba	3	1	3	1	1	0	0	0		2		1	5		5		5		2	2		2	1	2	2						2		2
2023-11-22	Arba Minch zuria	Ch Chalba	2	1	2	1	1	0	0	0		2		1	5		2		2		2	2		2	2	2	2						2		2
2023-11-23	Arba Minch zuria	Ch Chalba	3	1	3	1	1	0	0	0		2		2			5		5		2	2		1	1	1	1	0	0	3	0	0	2		2
2023-11-23	Arba Minch zuria	Ch Chalba	9	1	2	1	1	0	0	0		2		1	5		2		2		2	2		2	1	2	1	1	1	0	0	0	1	3	2
2023-11-24	Arba Minch zuria	Ch Chalba	3	1	3	1	1	0	0	0		2		2			8		8		2	2		1	1	1	2						2		2
2023-11-24	Arba Minch zuria	Ch Chalba	4	1	0	1	1	0	0	0		2		2			8		8		2	2		2	1	2	1	0	0	0	2	0	2		2
2023-11-16	Arba Minch zuria	Sile	4	2	0	1	1	0	0	0		2		2			5		5		2	2		2	1	2	2						2		2
2023-11-29	Arba Minch zuria	Sile	3	1	3	3	0	0	1	0		2		2			5		5		1	2		2	1	2	2						1	3	2
2023-11-27	Arba Minch zuria	Ch Chalba	4	1	3	1	1	0	0	0		2		2			8		8		2	2		1	1	1	2						1	2	2
2023-11-27	Arba Minch zuria	Ch Chalba	2	1	2	1	1	0	0	0		2		1	5		8		8		2	2		1	1	1	2						2		2
2023-11-27	Arba Minch zuria	Ch Chalba	2	2	0	1	1	0	0	0		2		1	5		8		8		2	2		1	1	1	2						2		2
2023-11-27	Arba Minch zuria	Ch Chalba	1	2	0	1	1	0	0	0		2		2			8		8		1	2		1	1	1	2						2		2
2023-11-27	Arba Minch zuria	Ch Chalba	3	1	3	1	1	0	0	0		2		2			8		8		2	2		1	1	1	2						2		2
2023-11-30	Arba Minch zuria	Sile	8	1		1	1	0	0	0		1		1	5		1		5		1	2		1	1	0	1	5	0	0	0	0	1	3	1	2
2023-11-30	Arba Minch zuria	Sile	4	1		1	1	0	0	0		2		2			5		5		1	2		1	1	1	1	2	0	0	0	0	2		2
2023-12-04	Arba Minch zuria	Sile	3	1		3	0	0	1	0		2		1	5		5		5		2	1	1	1	1	1	2						2		2
2023-12-04	Arba Minch zuria	Sile	3	1		3	0	0	1	0		2		1	2		2		2		1	2		3	2	3	1	6	0	1	0	0	2		2
2023-12-04	Arba Minch zuria	Sile	6	1		3	0	0	1	0		2		2			3		3		1	2		3	2	3	1	6	0	5	0	0	2		2
2023-12-02	Arba Minch zuria	Sile	3	2		1	1	0	0	0		1		1	5		5		5		2	2		1	1	0	2						1	4	2
2023-12-02	Arba Minch zuria	Sile	3	1		3	0	0	1	0		2		2			7		5		2	2		1	1	1	2						2		2
2023-12-01	Arba Minch zuria	Sile	2	2		3	0	0	1	0		2		2			5		5		2	2		1	1	1	1	6	0	0	0	1	1	2	2
2023-11-30	Arba Minch zuria	Sile	4	1	0	1	1	0	0	0		1		2			1		5		2	2		1	1	0	1	1	0	0	0	0	1	3	2
2023-11-30	Arba Minch zuria	Sile	3	2	0	3	0	0	1	0		2		2			8		8		1	2		2	1	2	1	1	0	0	0	0	2		2
2023-11-30	Arba Minch zuria	Sile	4	1	0	3	0	0	1	0		2		2			5		5		2	2		1	1	1	2						2		2
2023-12-01	Arba Minch zuria	Sile	6	1	4	1	1	0	0	0		1		1	5		1		2		2	2		1	1	0	2						2		2
2023-12-01	Arba Minch zuria	Sile	3	1	0	1	1	0	0	0		1		2			1		5		2	2		1	1	0	2						2		2
2023-12-04	Arba Minch zuria	Sile	4	1	1	3	0	0	1	0		2		1	2		3		3		2	2		3	2	3	2						2		2
2023-12-04	Arba Minch zuria	Sile	2	2	0	1	1	0	0	0		1		2			1		5		2	2		1	1	0	1	2	0	2	0	1	2		2
2023-12-04	Arba Minch zuria	Sile	8	2	0	3	0	0	1	0		2		1	2		3		2		2	2		3	2	3	1	2	0	2	0	1	2		2
2023-12-04	Arba Minch zuria	Sile	6	2	0	1	1	0	0	0		1		1	5		1		5		2	2		1	1	0	1	7	0	0	0	3	2		2
2023-12-04	Arba Minch zuria	Sile	5	1	3	1	1	0	0	0		1		1	5		1		2		2	2		1	1	0	1	6	0	4	0	0	1	5	2
2023-11-29	Arba Minch zuria	Sile	4	1	4	3	0	0	1	0		2		2			3		3		2	2		2	1	2	1	10	1	0	0	2	1	3	2
2023-12-01	Arba Minch zuria	Sile	3	2	0	1	1	0	0	0		1		2			5		5		2	2		0	1	0	2						2		2
2023-12-01	Arba Minch zuria	Sile	7	1	2	1	1	0	0	0		1		1	5		5		5		2	2		1	1	0	1	8	1	14	0	1	1	5	2
2023-12-01	Arba Minch zuria	Sile	2	2	0	1	1	0	0	0		1		2			1		8		1	2		1	1	0	2						2		2
2023-12-01	Arba Minch zuria	Sile	6	2	0	1	1	0	0	0		1		1	5		1		5		2	2		1	1	0	1	3	0	0	0	1	2		2
2023-12-01	Arba Minch zuria	Sile	5	2	0	1	1	0	0	0		1		1	5		1		6		2	2		1	1	0	1	4	0	0	0	2	1	2	2
2023-11-30	Arba Minch zuria	Sile	4	2	0	3	0	0	1	0		2		2			5		5		2	2		2	1	2	1	2	0	5	0	0	1	8	2
2023-11-30	Arba Minch zuria	Sile	8	2	0	3	0	0	1	0		2		2			5		5		2	2		1	1	1	2						2		2
2023-11-30	Arba Minch zuria	Sile	3	2	0	3	0	0	1	0		2		2			5		5		2	2		3	2	3	1	3	0	0	0	1	1	2	2
2023-12-01	Arba Minch zuria	Sile	3	1	0	1	1	0	0	0		1		2			8		8		2	2		1	1	0	1	0	0	3	0	0	2		2
2023-12-01	Arba Minch zuria	Sile	5	1	0	1	1	0	0	0		1		1	5		8		9	በማዳበርያ ሻራ የተሸፈነ	2	2		1	1	0	1	1	0	1	0	0	1	4	2
2023-12-01	Arba Minch zuria	Sile	3	1	0	1	1	0	0	0		1		2			8		8		2	2		1	1	0	2						1	4	2
2023-12-01	Arba Minch zuria	Sile	4	2	0	1	1	0	0	0		1		1	5		8		8		2	2		1	1	0	1	1	0	0	0	0	1	4	2
2023-12-01	Arba Minch zuria	Sile	4	2	0	3	0	0	1	0		2		2			8		5		2	2		1	1	1	2						2		2
2023-12-02	Arba Minch zuria	Sile	5	1	4	3	0	0	1	0		2		2			3		2		1	1	1	1	1	1	1	2	0	2	0	1	2		2
2023-12-02	Arba Minch zuria	Sile	11	1	3	3	0	0	1	0		2		1	2		3		2		2	2		3	3	2	1	7	2	22	0	1	1	5	2
2023-12-04	Arba Minch zuria	Sile	2	1	2	3	0	0	1	0		2		1	5		5		2		2	2		1	1	1	2						2		2
2023-12-04	Arba Minch zuria	Sile	7	1	2	1	1	0	0	0		1		1	5		8		8		2	2		1	1	0	1	4	0	0	0	1	1	5	2
2023-12-04	Arba Minch zuria	Sile	1	2	0	3	0	0	1	0		2		2			5		5		2	2		1	1	1	2						2		2
2023-12-04	Arba Minch zuria	Sile	2	1	0	3	0	0	1	0		2		2			8		5		2	2		1	1	1	2						2		2
2023-12-04	Arba Minch zuria	Sile	4	1	0	1	1	0	0	0		1		1	5		5		5		2	2		1	1	0	2						1	1	2
2023-12-04	Arba Minch zuria	Sile	8	2	0	3	0	0	1	0		2		1	2		3		2		2	2		3	2	3	1	1	0	1	0	1	2		2
2023-12-04	Arba Minch zuria	Sile	1	1	1	1	1	0	0	0		1		2			8		8		2	2		1	1	0	2						2		2
2023-12-04	Arba Minch zuria	Sile	1	2	0	3	0	0	1	0		2		2			8		5		2	2		1	1	1	2						2		2
2023-12-05	Arba Minch zuria	Sh Mella	4	1	0	1	1	0	0	0		2		1	5		2		2		2	2		3	2	3	2						2		2
2023-11-30	Arba Minch zuria	Sile	4	1	2	3	0	0	1	0		2		2			5		5		2	2		1	1	1	1	1	0	0	0	0	1	3	2
2023-12-01	Arba Minch zuria	Sile	3	2	0	1	1	0	0	0		2		2			5		5		2	2		2	1	2	2						2		2
2023-12-04	Arba Minch zuria	Sile	6	1	4	3	0	0	1	0		2		1	2		4		4		2	2		3	2	3	1	7	5	2	0	2	2		2
2023-12-04	Arba Minch zuria	Sile	1	1	0	3	0	0	1	0		2		2			4		7		2	2		1	1	1	2						2		2
2023-12-04	Arba Minch zuria	Sile	3	2	0	3	0	0	1	0		2		2			5		5		2	2		1	1	1	1	4	0	1	0	1	1	21	2
2023-12-05	Arba Minch zuria	Sile	4	1	0	1	1	0	0	0		1		2			5		1		2	1	1	1	1	0	2						2		2
2023-12-05	Arba Minch zuria	Sile	1	2	0	3	0	0	1	0		2		2			5		5		2	2		1	1	1	1	2	0	1	0	0	2		2
2023-12-05	Arba Minch zuria	Sile	1	2	0	3	0	0	1	0		2		2			5		5		2	2		1	1	1	1	3	0	0	0	0	2		2
2023-12-05	Arba Minch zuria	Sh Mella	4	1	4	1	1	0	0	0		1		2			1		5		2	2		1	1	0	1	4	0	0	0	1	1	1	2
2023-12-05	Arba Minch zuria	Sh Mella	5	2	0	1	1	0	0	0		1		1	5		1		2		2	2		1	1	0	1	1	0	0	0	0	2		2
2023-12-07	Arba Minch zuria	Sh Mella	5	1	4	1	1	0	0	0		2		1	5		2		2		2	2		2	2	2	2						2		2
2023-12-07	Arba Minch zuria	Sh Mella	9	1	9	1	1	0	0	0		2		1	5		2		2		2	2		3	2	2	2						2		2
2023-12-07	Arba Minch zuria	Sh Mella	5	1	4	1	1	0	0	0		2		1	5		2		2		2	2		2	2	2	1	7	0	2	0	1	1	2	2
2023-12-07	Arba Minch zuria	Sh Mella	4	1	4	1	1	0	0	0		2		1	5		5		5		1	2		2	2	2	1	4	8	0	0	0	1	4	2
2023-12-08	Arba Minch zuria	Sh Mella	3	1	3	3	0	0	1	0		2		1	5		3		2		2	2		1	1	1	2						2		2
2023-12-08	Arba Minch zuria	Sh Mella	4	1	4	3	0	0	1	0		2		1	5		2		2		2	2		1	1	1	2						2		2
2023-12-07	Arba Minch zuria	Sh Mella	2	1	2	1	1	0	0	0		2		1	5		2		2		2	2		2	2	2	2						2		2
2023-12-07	Arba Minch zuria	Sh Mella	1	2	0	1	1	0	0	0		2		1	5		2		2		2	2		2	1	1	2						2		2
2023-12-08	Arba Minch zuria	Sh Mella	3	1	0	3	0	0	1	0		2		2			5		5		2	2		1	1	1	2						2		2
2023-12-09	Arba Minch zuria	Sh Mella	2	1	2	3	0	0	1	0		2		2			5		5		2	2		1	1	1	1	1	0	0	0	0	2		2
2023-12-09	Arba Minch zuria	Sh Mella	8	1	3	3	0	0	1	0		2		1	4		3		3		2	2		4	2	4	1	2	0	0	0	1	1	4	2
2023-12-09	Arba Minch zuria	Sh Mella	6	1	6	1	1	0	0	0		2		2			8		8		1	1	1	2	2	2	2						2		2
2023-12-27	Arba Minch zuria	Sh Mella	3	2	0	1	1	0	0	0		2		1	5		2		2		2	2		2	2	3	2						2		2
2023-12-27	Arba Minch zuria	Sh Mella	3	1	3	1	1	0	0	0		2		2			5		5		2	2		1	1	1	2						2		2
2023-12-27	Arba Minch zuria	Sh Mella	3	1	3	1	1	0	0	0		2		2			2		5		2	2		1	1	1	2						2		2
2023-12-27	Arba Minch zuria	Sh Mella	1	2	0	1	1	0	0	0		2		2			2		2		2	2		1	1	1	2						2		2
2023-12-27	Arba Minch zuria	Sh Mella	4	1	2	3	0	0	1	0		2		1	5		2		2		2	2		3	2	3	2						2		2
2023-12-06	Arba Minch zuria	Sh Mella	5	1	0	1	1	0	0	0		2		1	5		5		5		2	2		2	2	2	1	5	0	0	0	1	2		2
2023-12-07	Arba Minch zuria	Sh Mella	4	1	4	1	1	0	0	0		2		1	5		5		5		2	2		3	2	3	1	1	0	0	0	0	2		2
2023-12-07	Arba Minch zuria	Sh Mella	2	1	2	1	1	0	0	0		2		1	5		2		2		2	2		2	2	2	1	2	0	0	0	0	2		2
2023-12-07	Arba Minch zuria	Sh Mella	1	1	1	1	1	0	0	0		2		1	5		5		5		2	2		2	2	2	2						2		2
2023-12-07	Arba Minch zuria	Sh Mella	2	1	2	1	1	0	0	0		2		1	5		5		2		2	2		1	2	2	1	1	0	0	0	0	2		2
2023-12-08	Arba Minch zuria	Sh Mella	1	2	0	1	1	0	0	0		2		2			5		5		2	2		1	1	1	2						2		2
2023-12-08	Arba Minch zuria	Sh Mella	7	2	0	1	1	0	0	0		2		2			5		5		2	2		1	1	1	1	4	0	0	0	0	2		2
2023-12-27	Arba Minch zuria	Sh Mella	7	1	7	1	1	0	0	0		1		2			8		2		2	2		1	1	0	1	2	0	1	0	0	1	4	2
2023-12-27	Arba Minch zuria	Sh Mella	6	1	6	1	1	0	0	0		1		1	5		1		2		2	2		0	1	0	1	3	0	0	3	0	1	10	2
2023-12-28	Arba Minch zuria	Sh Mella	4	1	4	1	1	0	0	0		2		2			2		2		2	2		1	1	1	2						2		2
2023-12-28	Arba Minch zuria	Sh Mella	3	1	3	1	1	0	0	0		1		2			8		8		2	2		1	1	0	2						2		2
2023-12-28	Arba Minch zuria	Sh Mella	8	1	3	1	1	0	0	0		2		2			8		8		2	2		3	2	2	1	2	0	0	0	1	2		2
2023-12-29	Arba Minch zuria	Sh Mella	8	1	5	1	1	0	0	0		2		2			8		8		2	2		3	2	3	2						1	2	2
2023-12-29	Arba Minch zuria	Sh Mella	5	1	5	3	0	0	1	0		2		2			5		5		2	2		1	1	1	1	2	0	0	0	0	2		2
2023-12-29	Arba Minch zuria	Sh Mella	5	1	5	3	0	0	1	0		2		2			5		5		2	2		1	1	1	2						2		2
2023-12-29	Arba Minch zuria	Sh Mella	4	1	3	1	1	0	0	0		2		2			8		8		2	2		2	2	2	2						2		2
2023-12-29	Arba Minch zuria	Sh Mella	3	1	3	1	1	0	0	0		2		2			2		2		2	2		3	2	3	1	3	0	0	0	0	2		2
2023-12-29	Arba Minch zuria	Sh Mella	5	1	3	1	1	0	0	0		1		1	5		1		5		2	2		1	1	0	2						2		2
2023-12-29	Arba Minch zuria	Sh Mella	2	1	2	1	1	0	0	0		1		2			1		5		1	2		1	1	0	2						2		2
2023-12-08	Arba Minch zuria	Sh Mella	4	2	0	1	1	0	0	0		1		1	5		5		5		2	2		1	1	0	2						2		2
2023-12-08	Arba Minch zuria	Sh Mella	5	1	5	1	1	0	0	0		2		2			5		5		2	2		3	2	3	2						2		2
2023-12-27	Arba Minch zuria	Sh Mella	5	1	0	1	1	0	0	0		1		2			5		5		2	2		1	1	0	2						2		2
2023-12-28	Arba Minch zuria	Sh Mella	3	1	3	1	1	0	0	0		1		2			9	Encet	9	Encet	1	2		1	1	1	2						2		2
2023-12-29	Arba Minch zuria	Sh Mella	4	1	0	1	1	0	0	0		1		2			1		1		1	2		1	1	0	1	0	1	0	0	0	2		2
2023-12-30	Arba Minch zuria	Sh Mella	8	1	8	1	1	0	0	0		2		2			8		8		2	2		2	2	2	1	2	0	2	0	0	2		2
2023-12-30	Arba Minch zuria	Sh Mella	2	1	2	1	1	0	0	0		2		2			5		5		2	2		1	1	1	2						2		2
2023-12-27	Arba Minch zuria	Sh Mella	3	1	0	1	1	0	0	0		2		2			8		8		2	2		1	1	1	1	2	0	0	0	0	2		2
2023-12-28	Arba Minch zuria	Sh Mella	5	1	2	1	1	0	0	0		1		2			8		8		2	2		1	1	0	1	1	0	3	0	1	2		2
2023-12-28	Arba Minch zuria	Sh Mella	3	1	0	1	1	0	0	0		2		1	5		5		5		2	2		1	1	1	1	2	0	0	0	0	2		2
2023-12-28	Arba Minch zuria	Sh Mella	5	1	5	1	1	0	0	0		2		2			8		8		1	2		1	1	1	1	2	0	0	0	1	2		2
2024-01-11	Arba Minch zuria	K Shelle	4	2	0	3	0	0	1	0		2		2			3		3		2	2		1	1	1	2						2		2
2024-01-11	Arba Minch zuria	K Shelle	4	1	2	3	0	0	1	0		2		2			6		5		2	2		3	2	3	1	4	0	0	0	2	1	4	2
2024-01-11	Arba Minch zuria	K Shelle	7	1	3	3	0	0	1	0		2		2			5		5		2	2		3	2	3	2						2		2
2024-01-12	Arba Minch zuria	K Shelle	4	2	0	1	1	0	0	0		2		2			8		8		2	2		1	1	1	1	2	0	0	0	0	2		2
2024-01-12	Arba Minch zuria	K Shelle	2	2	0	1	1	0	0	0		2		2			8		8		2	2		1	1	1	2						2		2
2024-01-12	Arba Minch zuria	K Shelle	4	2	0	3	0	0	1	0		2		1	3		4		4		2	2		3	2	2	1	4	0	0	0	2	2		2
2024-01-12	Arba Minch zuria	K Shelle	4	2	0	3	0	0	1	0		2		2			8		8		2	2		1	1	1	2						2		2
2024-01-12	Arba Minch zuria	K Shelle	2	2	0	3	0	0	1	0		2		2			8		8		2	2		1	1	1	2						2		2
2023-12-30	Arba Minch zuria	Sh Mella	4	1	4	1	1	0	0	0		2		2			8		8		2	2		1	1	1	2						2		2
2023-12-30	Arba Minch zuria	Sh Mella	3	1	3	1	1	0	0	0		2		2			8		8		2	2		1	1	1	2						2		2
2024-01-11	Arba Minch zuria	K Shelle	1	2	0	3	0	0	1	0		2		1	5		2		2		2	2		1	1	1	2						2		2
2024-01-11	Arba Minch zuria	K Shelle	1	2	0	1	1	0	0	0		2		2			5		5		2	2		3	2	3	2						2		2
2024-01-11	Arba Minch zuria	Sh Mella	6	1	1	3	0	0	1	0		2		1	5		2		2		2	2		2	1	2	2						1	2	2
2024-01-11	Arba Minch zuria	K Shelle	7	2	0	3	0	0	1	0		2		2			8		8		2	2		1	1	1	1	0	0	2	0	0	2		2
2024-01-11	Arba Minch zuria	K Shelle	4	2	0	3	0	0	1	0		2		2			8		8		2	2		1	1	1	2						2		2
2024-01-11	Arba Minch zuria	K Shelle	2	2	0	3	0	0	1	0		2		2			8		8		2	2		1	1	1	2						2		2
2024-01-11	Arba Minch zuria	K Shelle	9	1	9	3	0	0	1	0		2		1	5		2		2		2	2		3	2	3	1	0	0	0	3	0	1	2	2
2024-01-11	Arba Minch zuria	K Shelle	3	1	3	3	0	0	1	0		2		1	5		2		2		2	2		1	1	1	2						2		2
2024-01-11	Arba Minch zuria	K Shelle	4	1	4	3	0	0	1	0		2		1	5		2		2		2	2		1	1	1	2						1	2	2
2024-01-11	Arba Minch zuria	K Shelle	4	1	4	1	1	0	0	0		2		2			8		8		2	2		3	2	3	1	1	0	0	0	1	2		2
2024-01-12	Arba Minch zuria	K Shelle	3	1	0	1	1	0	0	0		2		2			8		8		2	2		3	2	2	2						1	3	2
2024-01-12	Arba Minch zuria	K Shelle	3	2	0	3	0	0	1	0		2		2			8		8		1	2		1	1	1	2						2		2
2024-01-16	Arba Minch zuria	K Shelle	4	1	3	3	0	0	1	0		2		2			8		8		2	2		1	1	1	2						2		2
2024-01-13	Arba Minch zuria	K Shelle	2	1	1	1	1	0	0	0		2		2			2		2		2	2		2	2	3	1	1	0	2	0	0	2		2
2024-01-13	Arba Minch zuria	K Shelle	5	1	0	3	0	0	1	0		2		1	5		3		2		2	2		1	1	1	1	0	0	2	0	0	1	5	2
2024-01-13	Arba Minch zuria	K Shelle	3	1	0	1	1	0	0	0		2		2			5		5		2	2		1	1	1	1	2	0	1	0	0	2		2
2024-01-13	Arba Minch zuria	K Shelle	6	1	2	1	1	0	0	0		2		2			5		5		2	2		1	1	1	2						2		2
2024-01-13	Arba Minch zuria	K Shelle	4	2	0	1	1	0	0	0		2		2			5		5		2	2		1	1	1	2						2		2
2024-01-15	Arba Minch zuria	Sh Mella	5	1	0	1	1	0	0	0		2		2			5		5		2	2		1	1	1	2						2		2
2024-01-15	Arba Minch zuria	K Shelle	8	2	0	3	0	0	1	0		2		1	3		3		2		2	2		4	2	4	2						2		2
2024-01-15	Arba Minch zuria	K Shelle	2	2	0	3	0	0	1	0		2		2			5		5		2	2		1	1	1	1	2	0	0	3	0	2		2
2024-01-15	Arba Minch zuria	K Shelle	2	2	0	1	1	0	0	0		2		2			6		6		2	2		2	2	2	2						1	1	2
2024-01-16	Arba Minch zuria	K Shelle	3	2	0	3	0	0	1	0		2		2			5		5		2	2		1	1	1	1	2	0	0	0	0	2		2
2024-01-16	Arba Minch zuria	K Shelle	3	1	3	3	0	0	1	0		2		2			8		8		2	2		1	1	1	1	1	0	0	0	0	2		2
2023-12-06	Arba Minch zuria	Sh Mella	5	1		1	1	0	0	0		2		1	1		2		2		2	2		2	2	2	2						2		1	2
2023-12-06	Arba Minch zuria	Sh Mella	6	1		1	1	0	0	0		2		1	5		2		2		2	2		2	2	2	1	8	0	3	0	1	1	9	2
2024-01-15	Arba Minch zuria	K Shelle	3	1		1	1	0	0	0		2		1	5		2		5		2	2		2	1	1	2						2		2
2024-01-15	Arba Minch zuria	K Shelle	4	1		1	1	0	0	0		2		1	5		2		2		2	2		1	1	1	1	1	0	0	0	0	2		2
2024-01-12	Arba Minch zuria	K Shelle	4	2	0	1	1	0	0	0		2		2			8		8		2	2		1	1	1	1	1	0	1	0	0	2		2
2024-01-12	Arba Minch zuria	K Shelle	7	1	1	1	1	0	0	0		2		2			2		2		2	2		3	2	3	1	2	0	0	0	0	2		2
2024-01-12	Arba Minch zuria	K Shelle	5	1	0	1	1	0	0	0		1		2			5		5		2	2		1	1	0	2						2		2
2024-01-13	Arba Minch zuria	K Shelle	6	1	0	1	1	0	0	0		2		2			5		5		2	2		2	1	2	1	3	0	2	0	0	2		2
2024-01-13	Arba Minch zuria	K Shelle	4	1	0	3	0	0	1	0		2		1	5		3		2		2	2		1	1	1	2						2		2
2024-01-13	Arba Minch zuria	K Shelle	3	1	0	1	1	0	0	0		2		2			8		8		2	2		2	1	2	2						2		2
2024-01-15	Arba Minch zuria	K Shelle	4	1	0	1	1	0	0	0		2		2			5		5		2	2		1	1	1	1	2	0	0	0	0	1	6	2
2024-01-15	Arba Minch zuria	K Shelle	2	2	0	1	1	0	0	0		2		1	5		2		2		2	2		1	1	1	1	1	0	0	0	0	2		2
2024-01-15	Arba Minch zuria	K Shelle	5	2	0	1	1	0	0	0		2		1	5		5		5		2	2		1	1	1	1	3	0	2	0	0	2		2
2024-01-16	Arba Minch zuria	K Shelle	6	1	5	1	1	0	0	0		2		2			8		8		2	2		1	1	1	2						2		2
2024-01-16	Arba Minch zuria	K Shelle	3	1	3	3	0	0	1	0		2		2			8		8		2	2		1	1	1	2						2		2
2024-01-17	Arba Minch zuria	K Shelle	2	2	0	1	1	0	0	0		2		2			5		5		2	2		1	1	1	1	1	0	0	0	0	2		2
2024-06-10	Arba Minch zuria	Sh Mella	5	1	2	3	0	0	1	0		2		2			2		5		2	2		3	2	2	2						2		2
2024-06-10	Arba Minch zuria	Sh Mella	4	1	4	1	1	0	0	0		2		1	5		5		5		2	2		2	2	2	1	2	0	0	0	0	2		1	2
2024-06-10	Arba Minch zuria	Sh Mella	2	1	2	1	1	0	0	0		2		1	5		2		2		2	2		2	2	2	1	1	0	0	0	0	2		2
2024-06-11	Arba Minch zuria	Sile	6	1	3	3	0	0	1	0		2		2			2		5		2	2		3	2	3	1	0	0	2	0	0	2		2
2024-06-08	Arba Minch zuria	Sh Mella	4	1	3	1	1	0	0	0		2		1	5		5		2		1	2		1	1	1	2						2		2
2024-06-08	Arba Minch zuria	Sh Mella	2	1	1	1	1	0	0	0		2		1	5		2		2		2	2		2	2	2	1	0	0	1	0	0	2		2
2024-06-10	Arba Minch zuria	Sh Mella	3	1	0	1	1	0	0	0		2		1	5		2		2		2	2		2	2	3	2						2		2
2024-06-10	Arba Minch zuria	Sh Mella	6	1	6	1	1	0	0	0		2		1	5		2		2		2	2		2	2	2	1	3	0	0	0	1	2		2
2024-06-11	Arba Minch zuria	Sh Mella	4	1	4	1	1	0	0	0		2		1	5		2		2		2	2		2	2	2	2						1	2	2
2024-06-11	Arba Minch zuria	Sile	5	1	4	3	0	0	1	0		2		1	5		2		2		2	2		2	1	2	1	5	0	0	0	1	2		2
2024-06-12	Arba Minch zuria	Sile	6	1	0	1	1	0	0	0		1		2			5		5		2	1	4	1	1	0	1	0	0	4	0	0	1	1	2
2024-06-10	Arba Minch zuria	K Shelle	4	2	0	1	1	0	0	0		2		1	5		2		2		2	2		2	1	2	1	11	0	8	0	3	2		2
2024-06-11	Arba Minch zuria	K Shelle	4	2	0	1	1	0	0	0		1		2			1		8		2	2		1	1	0	2						1	1	2
2024-06-12	Arba Minch zuria	K Shelle	4	1	0	1	1	0	0	0		2		1	5		5		5		2	2		2	1	3	1	0	0	2	2	0	2		2
2024-06-12	Arba Minch zuria	K Shelle	4	2	0	3	0	0	1	0		2		2			6		8		2	2		3	2	2	1	0	0	4	0	0	2		2
2024-06-12	Arba Minch zuria	K Shelle	8	1	2	1	1	0	0	0		2		2			5		5		1	2		3	3	2	1	2	0	3	5	1	2		2
2024-06-12	Arba Minch zuria	K Shelle	7	1	5	3	0	0	1	0		2		1	5		6		2		2	2		3	2	3	1	4	0	1	0	1	2		2
2024-06-13	Arba Minch zuria	K Shelle	6	1	5	3	0	0	1	0		2		1	5		2		2		2	2		3	2	3	1	3	0	0	7	0	2		2
2024-06-13	Arba Minch zuria	K Shelle	2	1	1	1	1	0	0	0		2		1	5		2		2		2	2		1	1	1	2						2		2
2024-06-10	Arba Minch zuria	K Shelle	4	2	0	1	1	0	0	0		1		1	5		8		8		2	2		1	1	0	1	2	0	2	0	0	1	5	2
2024-06-11	Arba Minch zuria	K Shelle	3	2	0	1	1	0	0	0		1		1	5		2		2		2	2		1	1	0	2						2		2
2024-06-12	Arba Minch zuria	K Shelle	5	1	0	3	0	0	1	0		2		1	4		2		2		2	2		3	2	3	2						2		2
2024-06-12	Arba Minch zuria	K Shelle	6	2	0	1	1	0	0	0		2		2			5		5		2	2		2	2	2	2						1	1	2
2024-06-12	Arba Minch zuria	K Shelle	7	1	0	1	1	0	0	0		2		1	5		2		2		2	2		3	2	3	2						2		2
2024-06-12	Arba Minch zuria	K Shelle	7	1	3	3	0	0	1	0		2		1	2		3		2		2	2		5	2	5	1	3	1	0	0	1	2		2
2024-06-12	Arba Minch zuria	K Shelle	4	1	4	1	1	0	0	0		1		2			2		2		2	2		1	1	0	2						2		2
2024-06-12	Arba Minch zuria	K Shelle	3	1	3	1	1	0	0	0		1		2			2		2		2	2		1	1	0	2						2		2
2024-06-12	Arba Minch zuria	K Shelle	5	1	5	1	1	0	0	0		1		2			1		2		2	2		1	1	0	1	0	0	1	4	0	2		2
2024-06-12	Arba Minch zuria	K Shelle	5	1	3	1	1	0	0	0		2		2			2		3		2	2		3	2	3	1	1	0	0	4	0	2		2
2024-06-12	Arba Minch zuria	K Shelle	6	2	0	2	0	1	0	0		2		1	5		2		2		2	2		3	2	3	2						2		2
2024-06-12	Arba Minch zuria	K Shelle	4	1	0	1	1	0	0	0		1		2			8		8		2	2		1	1	0	1	0	0	0	2	0	2		2
2024-06-12	Arba Minch zuria	K Shelle	4	1	4	1	1	0	0	0		1		2			5		5		2	2		1	1	0	1	0	0	0	4	0	2		2
2024-06-12	Arba Minch zuria	K Shelle	1	1	1	1	1	0	0	0		1		2			5		2		2	2		1	1	0	1	2	0	0	0	0	2		2
2024-06-13	Arba Minch zuria	K Shelle	4	2	0	1	1	0	0	0		1		2			5		5		2	2		1	1	0	1	0	0	0	4	0	2		2
2024-06-13	Arba Minch zuria	Sh Mella	8	1	6	3	0	0	1	0		2		1	5		2		2		2	2		3	2	4	1	2	0	0	0	0	2		2
2024-06-13	Arba Minch zuria	Sh Mella	6	2	0	1	1	0	0	0		1		2			1		1		1	2		1	1	0	2						2		2
2024-06-13	Arba Minch zuria	Sh Mella	8	2	0	1	1	0	0	0		2		2			6		6		2	2		2	1	2	1	2	0	0	0	1	1	2	1	2
2024-06-14	Arba Minch zuria	Lante	6	1	6	3	0	0	1	0		2		2			5		5		2	2		3	2	4	2						1	2	1	2
2024-06-14	Arba Minch zuria	Lante	1	1	1	3	0	0	1	0		2		1	5		2		4		2	2		1	1	0	2						2		2
2024-06-14	Arba Minch zuria	Lante	2	1	2	3	0	0	1	0		2		2			3		3		2	2		2	1	2	1	1	1	0	1	0	2		1	2
2024-06-15	Arba Minch zuria	Ch Chalba	3	2	0	1	1	0	0	0		2		2			5		5		2	2		1	1	0	2						2		2
2024-06-12	Arba Minch zuria	Sh Mella	5	1	0	1	1	0	0	0		2		2			5		5		2	2		3	2	3	1	2	0	3	0	0	2		2
2024-06-12	Arba Minch zuria	Sh Mella	6	1	4	1	1	0	0	0		2		2			5		5		2	2		2	2	3	1	2	0	2	0	0	1	2	2
2024-06-12	Arba Minch zuria	Sh Mella	9	1	9	1	1	0	0	0		2		2			5		5		2	2		3	2	2	2						1	2	2
2024-06-12	Arba Minch zuria	Sh Mella	6	2	0	1	1	0	0	0		2		2			5		5		2	2		3	3	2	1	2	0	0	0	1	2		2
2024-06-12	Arba Minch zuria	Sh Mella	7	2	0	1	1	0	0	0		2		2			5		5		2	2		3	4	3	1	4	0	2	0	2	2		2
2024-06-12	Arba Minch zuria	Sh Mella	5	1	4	3	0	0	1	0		2		1	5		5		5		2	2		2	2	1	2						2		2
2024-06-13	Arba Minch zuria	Sh Mella	6	2	0	1	1	0	0	0		2		2			5		5		2	2		3	2	3	1	1	0	3	0	0	2		2
2024-06-13	Arba Minch zuria	Sh Mella	5	1	4	1	1	0	0	0		2		1	5		2		2		2	2		3	2	3	2						1	4	2
2024-06-13	Arba Minch zuria	Sh Mella	7	2	0	3	0	0	1	0		2		1	5		3		3		2	2		3	2	3	1	2	0	0	0	2	2		2
2024-06-13	Arba Minch zuria	Sh Mella	4	1	0	1	1	0	0	0		2		1	5		5		5		2	2		4	2	2	1	7	2	5	0	2	1	2	2
2024-06-14	Arba Minch zuria	Lante	2	1	2	1	1	0	0	0		2		2			5		5		2	2		1	1	1	2						2		2
2024-06-15	Arba Minch zuria	Lante	2	2	0	1	1	0	0	0		2		2			5		5		2	2		1	1	1	2						2		2
2024-06-15	Arba Minch zuria	Lante	5	2	0	1	1	0	0	0		2		2			5		5		2	2		2	2	2	2						1	5	2
2024-06-14	Arba Minch zuria	Ch Mile	1	1	1	1	1	0	0	0		2		2			5		5		2	2		3	2	3	2						2		2
2024-06-14	Arba Minch zuria	Ch Mile	2	2	0	1	1	0	0	0		2		2			5		5		2	2		2	2	2	2						2		2
2024-06-15	Arba Minch zuria	Ch Chalba	3	1	0	3	0	0	1	0		2		1	5		5		2		2	2		3	2	2	2						2		2
2024-06-14	Arba Minch zuria	Ch Mile	7	2	0	3	0	0	1	0		2		2			8		8		2	2		1	1	1	2						2		2
2024-06-14	Arba Minch zuria	Ch Mile	3	1	0	1	1	0	0	0		2		1	5		5		5		2	2		1	1	1	2						2		2
2024-06-14	Arba Minch zuria	Ch Mile	4	2	0	1	1	0	0	0		2		2			5		5		2	2		1	1	1	2						2		2
2024-06-14	Arba Minch zuria	Ch Mile	1	2	0	1	1	0	0	0		2		2			5		5		2	2		1	1	1	2						2		2
2024-06-15	Arba Minch zuria	Ch Mile	3	1	3	1	1	0	0	0		2		1	5		5		5		2	2		1	1	1	2						1	2	2
2024-06-15	Arba Minch zuria	Ch Mile	2	1	2	1	1	0	0	0		2		1	5		5		5		2	2		1	1	1	2						2		2
2024-06-15	Arba Minch zuria	Ch Mile	3	1	1	1	1	0	0	0		2		2			5		5		2	2		2	2	3	1	1	0	0	0	0	2		2
2024-06-15	Arba Minch zuria	Ch Chalba	4	1	3	1	1	0	0	0		2		2			5		5		2	2		2	1	2	1	2	0	0	0	0	2		2
2024-06-17	Mirab Abaya	Fura	7	2	0	1	1	0	0	0		2		2			5		5		2	2		1	1	1	2						2		2
2024-06-13	Arba Minch zuria	Sh Mella	6	1	3	1	1	0	0	0		1		2			5		5		2	2		1	1	1	1	3	0	0	0	0	2		2
2024-06-18	Mirab Abaya	U Lante	6	1	3	1	1	0	0	0		2		2			6		6		2	2		4	4	3	2						2		2
2024-06-18	Mirab Abaya	Ankober	4	1	1	1	1	0	0	0		2		1	5		8		5		2	2		2	2	3	1	0	1	0	0	0	2		2
2024-06-19	Mirab Abaya	Alge	6	1	0	1	1	0	0	0		2		2			5		5		2	2		2	2	4	1	4	0	9	0	0	2		2
2024-06-19	Mirab Abaya	Delbo	3	2	0	1	1	0	0	0		2		1	5		2		2		2	2		1	1	1	1	2	0	0	0	1	1	2	2
2024-06-19	Mirab Abaya	Delbo	3	1	0	1	1	0	0	0		2		2			5		5		2	2		3	2	3	1	0	1	0	0	0	2		2
2024-06-19	Mirab Abaya	Mole	3	1	3	3	0	0	1	0		2		2			8		5		2	2		3	2	4	2						2		2
2024-06-19	Mirab Abaya	Mole	5	2	0	1	1	0	0	0		2		2			1		8		2	2		1	1	1	1	0	0	5	0	0	1	1	2
2024-06-17	Mirab Abaya	U Lante	4	1	0	3	0	0	1	0		2		2			5		3		2	2		1	1	1	2						2		2
2024-06-17	Mirab Abaya	U Lante	5	1	5	1	1	0	0	0		2		2			5		5		2	2		1	1	1	2						2		2
2024-06-18	Mirab Abaya	U Lante	2	2	0	1	1	0	0	0		2		1	5		2		2		2	2		2	1	2	2						2		2
2024-06-20	Mirab Abaya	Delbo	3	2	0	1	1	0	0	0		2		1	5		2		2		2	2		2	2	2	2						1	6	2
2024-06-20	Mirab Abaya	Delbo	3	2	0	3	0	0	1	0		2		1	5		2		2		2	2		3	2	3	2						2		2
2024-06-20	Mirab Abaya	Delbo	4	1	0	1	1	0	0	0		2		1	5		5		2		2	2		2	1	2	2						2		2
2024-06-20	Mirab Abaya	Delbo	8	2	0	3	0	0	1	0		2		1	3		6		6		2	2		4	3	3	1	8	1	0	0	4	1	8	2
2024-06-14	Arba Minch zuria	Ch Mile	1	1	1	1	1	0	0	0		2		2			5		5		2	2		1	1	1	2		180				1	3	2
2024-06-14	Arba Minch zuria	Ch Mile	2	1	1	1	1	0	0	0		2		1	5		5		5		2	2		2	2	2	2						2		2
2024-06-14	Arba Minch zuria	Ch Mile	4	1	3	1	1	0	0	0		2		2			5		5		2	2		1	1	1	1	3	0	2	1	0	2		2
2024-06-15	Arba Minch zuria	Ch Mile	4	1	4	1	1	0	0	0		2		1	5		2		2		2	2		1	2	2	2						1	2	2
2024-06-18	Mirab Abaya	Mole	7	1	5	3	0	0	1	0		2		1	3		2		2		2	2		2	2	2	1	3	0	0	0	1	1	2	2
2024-06-19	Mirab Abaya	Mole	2	2	0	1	1	0	0	0		2		2			5		5		2	2		1	1	2	2						2		2
2024-06-20	Mirab Abaya	Delbo	1	2	0	1	1	0	0	0		2		2			5		5		2	2		2	2	1	2						2		2
2024-06-20	Mirab Abaya	Delbo	5	2	0	1	1	0	0	0		2		1	5		2		2		2	2		3	2	2	2						1	8	2
