# Supplementary material for: Molecular xenomonitoring for identifying Plasmodium parasites and blood meal sources in mosquitoes of the southern Rift Valley Lakes, South Ethiopia
Source: Research Square preprint supplement (doi:10.21203/rs.3.rs-7284584/v1), 2025-09-01
Supplement: Supplementary file 2 [file 852c11cbb9e96ef0ae49bb03.pdf]

## **Consent and information sheet form**

Participant information sheet and consent form, Arba Minch University Post Graduate Studies,  
Department of Biology, Infectious disease Program

### **I. Information sheet**

#### **Introduction**

I am Nigatu Eligo. I am post-graduate PhD student in Arba Minch University in Biology department “Infectious disease” program. I am doing my research on assessing the impact of house screening and ivermectin cattle treatment on residual malaria transmission using entomological indicators in southwest Ethiopia: A Cluster Randomized Control Trial. I am going to give you information and invite you to participate in this research as house owner to permit your house for center for disease control (CDC) light trap, pyrethrin spray sheet collection (PSC), and Human Landing collection (HLC) mosquito sampling. You are free to decide your agreement to participate or not voluntarily. If you faced something wrong or that are difficult to you to understand, please ask me any time and I will take time to explain.

Regardless of the presence of core malaria controlling tools, the transmission of malaria is continuing and affecting millions of lives globally. Several reasons are raised behind this residual malaria transmission. Malaria mosquito behavioral change, human activities at night time when the malaria mosquitoes become active, and vector resistance to insecticides that used in insecticide treated bed nets and indoor residual spray. This study will be done in malaria endemic villages of Gamo zone, southwest Ethiopia close to the southern Rift ally Lakes, Abaya and Chamo. By doing this research, the community living in this study area will be benefited by the trial of this complementary malaria control interventions screening house and cattle treatment with ivermectin may make some additional reduction of mosquito’s density as well as the reduction of the residual malaria transmission. This is also may be good evidence for policy makers to implement as one of malaria control strategy.

#### **Purpose**

This research is intended to examine and answer, do the screening houses and ivermectin cattle treatment reduce indoor and outdoor mosquito density in southwest Ethiopia?; Do the screening houses and ivermectin cattle treatment affect the blood meal feeding patterns of mosquitoes in southwest Ethiopia?; Do the screening houses and ivermectin cattle treatment reduce the gametocyte positivity rate in freshly fed mosquitoes in southwest Ethiopia?; Do the human night time activities and sleeping patterns contribute for residual malaria transmission?; Does ivermectin cattle treatment post-feeding reduce parasite transmission in malaria mosquitoes?: So you are pleased to participate in this study voluntarily.

#### **Procedure**

If you are house owner and volunteer for participation, your house will be selected randomly for one of CDC light trap, PSC or HLC mosquito sampling and direct human sleeping time observation. So, we will visit once/month for these mosquito sampling methods.

If you are participant as field assistant, you are needed to participate in installing the CDC light trap, HLC and PSC mosquito sampling in respective selected houses, and other entomological activities in your kebele.

### **Voluntary Participation**

Your decision to have your participation in this study is entirely voluntarily. It is your choice whether to participate or not. If you choose not to involve yourself, all your relation with any one in society and the investigator of this study will be normal and nothing will change. You may also choose to change your mind later and stop participating, even if you agreed earlier.

### **Participant selection**

I am inviting you to take part in this research because you are living in this kebele (Delbo, Algie, Mole, Ankober, Fura, Umo Lante, Lante, Chano Mile, Chano Chalba, Shara, Sile, Shelle Mella, Elgo, Shelle, Bicha) selected purposely as a malaria endemic villages in Mirab Abaya and Arba Minch area districts in Gamo zone, and your house is situated near to breeding site of the village so that your cluster is selected for one of the trial in this research and your house is one of these clusters.

### **Duration**

This study is intended to take 2 years data collection in these selected areas. Entomological sample collection will be conducted each month and this means total 24x trapping in 24 months. We need one visiting night in each house for malaria collections per month. During this time, you are requested to allow your house for one of either collection type mentioned above.

### **My responsibility**

Providing necessary information about the research and participants who takes some part of the research and what benefit they can get from this study and also what challenges they may face. Answer the questions made in the mind of the participants and make the research aim clear for all participants.

### **Your responsibility**

You are requested to allow your house for one of either mosquito collection type light trap. As it is discussed before this collection is needs overnight. Study participants who selected as field assistants requested to do all works directed to do form investigator as per their payment.

### **Risk**

By participating in this research, it is obvious that you may face some discomforts. There is a possibility that you may be disturbed in your sleeping time when the CDC light trap lamp producing light to attract mosquitoes; human landing collector may move out/in the house in each hour; early awaking for PSC collection may disturb your early morning sleeping; an interview for human behavior examination may takes your time, and so on. So it is important to inform you all possibilities of discomfort you may face for one day per month in following two years.

### **Benefits**

Participants who selected as field assistant will be paid as per their participation in the research. But the participants as owner of the house will not be paid. There may not be any benefit to the society at this stage of the research, but in future time they will benefit from the appropriate intervention measures applied as recommendation provided in this research.

### **Confidentiality**

The information that we collect from this research project will be kept confidential. Information collected about you will be put away and no-one but the researchers will be able to see it. Any information about you will have a number (code) instead of your name. Only the researchers will know the code. It will not be shared with or given to anyone except investigator.

### **Right to withdraw from the study**

You have the right to withdraw from the study at any time without consequence or penalty.

### **Result publication and dissemination**

The results of the study will be resented shared and shared in coppies to your kebele.

If you have any further questions about the study process and data collection, you can contact the person who owns and conducts the study at the following address.

Mr. Nigatu Eligo

Phone number +251-921223216, Email: [enigatu6@gmail.com](mailto:enigatu6@gmail.com)

In addition, if you have a complaint about the research because of you find the data collection process unethcal during the conduct of this research, you can contact:

Dr. Fekadu Massebo

Phone number +251-911733885, Email: [massebofekadu@gmail.com](mailto:massebofekadu@gmail.com)

Manaye Yihune (Ass.Prof)

Phone number +251-911008759

Email: [manaye.yihune@amu.edu.et](mailto:manaye.yihune@amu.edu.et)/ [ymanaye@yahoo.com](mailto:ymanaye@yahoo.com)

## **Certificate of Consent**

I understand that this study is designed to gather information for the thesis work on Evaluating the Impact of a Novel Push-Pull Vector Control Strategy on Residual Malaria Transmission Using Entomological Indicators in Southwest Ethiopia: A Cluster Randomized Control Trial. I will be one of the participants in this study.

My participation in this project is voluntarily. I understand that I will not be paid for my participation. I may withdraw and discontinue participation at any time without penalty. If I withdraw myself from the participation, no one on my village will be told.

Participation involves CDC light trap/ HLC/ PSC collection overnight once in my house.

I have read and understand the explanation provided to me. I have had all my questions answered to my satisfaction, and I voluntarily agree to participate in this study.

## **II. Consent form**

### **Consent form for head of households**

1. Is all information given above clear to you? Yes..... No.....
2. We understand all procedures of the study; his/her participation is completely based on willingness. We were also told that he/she will lose nothing for not participating in the study and he/she have full right to discontinue providing information at any time of data collection and all information he/she will provide will be kept confidential. So, are you willing to participate in the study? Ye..... No.....

If yes, your Signature \_\_\_\_\_

### **Consent form for the Data collectors**

1. Is all information given above clear to you? Yes..... No.....
2. I understand all procedures of the study. My participation is completely based on my wish. I was also told that I will lose nothing for not participating in the study and I have full right to discontinue doing data collection at any time and all information will be kept confidential.

So, are you willing to participate in this study? Yes.....No.....

If yes, your Signature \_\_\_\_\_

Witnesses

1.----- Signature-----

2.----- Signature-----

3.----- Signature-----

For any question contact- Nigatu Eligo (principal investigator)

Tel mobile- 09-21-22-32-16      Email- enigatu6@gmail.com

Thank you for your willingness to participate in the study!

Amharic version of participant information sheet (የመረጃና የስምምነት መግለጫ)

**የድርጅቱ ስም:-**በአርባምንጭ ዩኒቨርሲቲ የድህረምረቃ ጥናት፤ የባዮሎጂ ትምህርት ክፍል፤ ተላላፊ በሽታዎች ሦስተኛ ድግሪ ፕሮግራም

**መግቢያ:-** የቤቶችን መስኮቶችንና በሮችን እና የወባ ትንኝ መግቢያ ቀዳዳዎችን በሜሽ ሽቦ በመጋረድና የአይቨርመክትን መድሃኒት ለከብቶች በመስጠት የወባ መተላለፍ ላይ ምን ያህል ተጽዕኖ እንዳለው በሚያሳዩ የእንቱሞሎጂ አመላካቾች የሚደረግ አሰሳ በሚል ርዕስ ጥናት ይደረጋል። ስለዚህ ሥራ ለእርስዎ መረጃ እየሰጠሁ የእርስዎ ቤት ለወባ ትንኝ መሰብሰቢያ እንዲሳተፍ ፈቃደኝነትዎን እጠይቃለሁ። በስራው ውስጥ ለመሳተፍም ሆነ ላለመሳተፍ ሙሉ ፈቃድ ያለዎት ሲሆን በማንኛውም ጊዜ የሚፈጠርብዎትን ጥያቄ መጠየቅ ይችላሉ፤ ለተፈጠረብዎት ጥያቄ መልስ ለመስጠት ሁሌም ዝግጁ ነኝ። በዝህ ጥናት የቤቶችን መስኮትና በር እና ሌሎች የወባ ትንኝ መግቢያ ቀዳዳዎችን በሜሽ ሽቦ መጋረድና የአይቨርመክትን መድሃኒት ለከብቶች በመስጠት በሚገኘው የወባ ትንኝ መጠንና ወባ መቀነስ ተጠቃሚ ይሆናሉ። ከዚህም ባለፈ ከዚህ ጥናት በሚገኘው መረጃ ለፖሊሲ ቀራጭ አስተዳደር አካላት በሚተገበረው ትግበራ ተጠቃሚ ይሆናል።

**ዓላማ:-** የቤቶችን መስኮትና በር እና ሌሎች የወባ ትንኝ መግቢያ ቀዳዳዎችን በሜሽ ሽቦ መጋረድና የአይቨርመክትን መድሃኒት ለከብቶች በመስጠታችን ከቤት ውጭና ቤት ውስጥ ያለው የወባ ትንኝ መጠን እንደሚቀንስ ለማረጋገጥ። የሰዎች የማታ እንቅስቃሴዎች እና የመተኛት ሁኔታ ለወባ መተላለፍ አስተዋጽኦ አለው ወይም የለውም የሚለውን ጥያቄ ለመማለስ ነው። ስለሆነም ኤርስዎ በዚህ ጥናት ውስጥ በፈቃደኝነት ተሳታፊ እንድሆኑ ይጠየቃሉ።

**አሠራር:-** በቤትዎ የወባ ትንኝ ናሙና መሰብሰቢያ እና ቀጥተኛ የሰው የእንቅልፍ ጊዜ ምልክታ በሁለት ወር አንድ ጊዜ እናደርጋለን።

**በፈቃደኝነት ተሳትፎ:-** በዚህ ጥናት ውስጥ የመሳተፍ ውሳኔዎ ሙሉ በሙሉ በፈቃደኝነት ነው። መሳተፍ ወይም አለመሳተፍ የእርስዎ መብት ነው። ራስዎን ከተሳትፎ በማግለልዎ ከማንም ጋር ያለዎት ግንኙነት እና የዚህ ጥናት ቡድን ምንም ነገር አይደርስብዎትም። በማንኛውም ጊዜ መሳተፍዎን ማቆም ይችላሉ።

**የተሳታፊ ምርጫ፡-** የእርስዎ ቤት የወባ በሽታ ካለባቸው እና የወባ ትንኝ መራቢያዎች አጠገብ ከሚገኙ ቀበሌያት ውስጥ ስለሆነ በዚህ ጥናት ውስጥ እንድሳተፍ ተመርጧል።

**ቆይታ፡** ይህ ጥናት ለ2 ዓመታት በሁለት ወር አንድ ጊዜ መረጃ ለመሰብሰብ የታሰበ ነው።

**የእኔ ኃላፊነት፡-** ስለምርምሩ እና በጥናቱ የተወሰነ ክፍል ውስጥ ስለሚወሰዱ ኃላፊነቶች ለተሳታፊዎች አስፈላጊውን መረጃ መስጠት እና ከዚህ ጥናት ምን ጥቅም ማግኘት እንደሚችሉ እና እንዲሁም ምን ተግዳሮቶች ሊያጋጥሟቸው እንደሚችሉ ማሳወቅ እና በተሳታፊዎች የሚነሱ ጥያቄዎችን መመለስና ግልጽ ማድረግ።

**የእርስዎ ኃላፊነት፡-** ቤትዎን ለወባ ትንኝ መሰብሰቢያ ከተመረጡ ዘዴዎች ውስጥ ለአንዱ መፍቀድ።

**ስጋት፡-** በዚህ ጥናት ውስጥ በመሳተፍ አንዳንድ የማይመቹ ነገሮች ሊያጋጥሙዎት እንደሚችል ግልጽ ነው። ትንኞችን ለመሳብ የሚጠቀማቸው ዘዴዎች እንቅልፍዎን ሊረበሽ ይችላል።

**ጥቅሞች፡-** ይህ ጥናት የወባ ትንኝን ሊቀንስ ይችላል፤ እንዲሁም በከብቶች ላይ ሊከሰቱ የሚችሉ የውጭና የውስጥ ጥገኛ ትላትል ስርጭትን ሊቀንስ ይችላል። ከዚህ ጥናት በሚገኘው ውጤት መሠረት ከሚተገበሩ ተገቢ ውሳኔዎች ተጠቃሚ ይሆናሉ።

**ሚስጥራዊነት፡-** ከዚህ የምርምር ፕሮጀክት የምንሰበስበው መረጃ በሚስጥር ይጠበቃል። ስለ እርስዎ የተሰበሰበ መረጃ ይቀመጣል እና ከተመራማሪዎቹ በስተቀር ማንም ሊያየው አይችልም። ስለ እርስዎ ያለ ማንኛውም መረጃ ከእርስዎ ስም ይልቅ መለያ ቁጥር (code) ይኖረዋል።

**የውጤት ህትመት እና ስርጭት፡-** በጥናቱ የተገኘውን ውጤት እንድጋሩ ይደረጋል።

በጥናቱ ሂደትና መረጃ አሰባሰብ ላይ ተጨማሪ ጥያቄ ካለ ጥናቱን በባለቤትነት የሚያከናውነውን ሰው በሚቀጥለው አድራሻ ማግኘት ይችላሉ።

ስም ፡ ንገቱ እልጐ

ስልክ፡ +251-921223216, ኢሜል፡ [enigatu6@gmail.com](mailto:enigatu6@gmail.com)



በተጨማሪ በጥናቱ ላይ ቅሬታ ካለዎት፡-ይህ ጥናት በሚከናወንበት ጊዜ መረጃ አሰባሰብ ሂደት ከስነ ምግባር ውጭ ሆኖ ካገኙት

ዶ/ር ፈቃዱ ማሴቦ:

ስልክ +251-911733885, ኢሜል: massebofekadu@gmail.com

ማናዩ ይሁኔ (ረ/ፐሮፌሰር),

ስልክ +251-911008759,

ኢሜል: [manaye.yihune@amu.edu.et](mailto:manaye.yihune@amu.edu.et)/ [ymanaye@yahoo.com](mailto:ymanaye@yahoo.com)

በጥናቱ ለመሳተፍ ፍቃደኛ ነዎት፡፡ አዎ ----- አይደለሁም -----

**የፍቃድ የምስክር ወረቀት**

አርባምንጭ ዩኒቨርሲቲ ተፈጥሮ ሣይንስ ኮሌጅ፣ የፒኤችዲ ፕሮገራም ጥናትና ምርምር ክፍል

የተመራማሪ ስም፡ ንገቱ እልጎ

የቤተሰብ ልዩ መለያ/ ቁጥር/ \_\_\_\_\_

የግለሰብ መለያ \_\_\_\_\_

የተሳታፊው ስም \_\_\_\_\_ እድሜ \_\_\_\_\_ ያታ \_\_\_\_\_

ይህ ጥናት “የኢንቶሞሎጂ አመልካቾችን በመጠቀም የቤቶችን መስኮቶችንና በሮችን እንድሁም የወባ ትንኝ መግቢያ ቀዳዳዎችን በሜሽ ሽቦ መጋረድና የአይቨርመክትን መድሃኒት ለከብቶች በመስጠት የሚያደርሰውን ተፅእኖ የሚገምገም የጥናት ሥራ መረጃን ለመሰብሰብ የተዘጋጀ መሆኑን ስለተረዳሁ በዚህ ጥናት ውስጥ ከተሳታፊዎች አንዱ እሆናለሁ። በዚህ ፕሮጀክት ውስጥ የእኔ ተሳትፎ በፈቃደኝነት ነው። ለተሳትፎ ክፍያ እንደማይከፈለኝ ተረድቻለሁ። በማንኛውም ጊዜ ያለ ተፅዕኖ ተሳትፎዬን ማቋረጥ እንደሚችል ተረድቻለሁ። የወባ ትንኝ በቤቴ ውስጥ ከሁለት ወር አንድ ጊዜ እንደሚሰበሰብ ማብራሪያውን ተረድቻለሁ። ለጥያቄዎቼ ሁሉ እርካታ አግኝቻለሁ፤ እናም በዚህ ጥናት ለመሳተፍ በፈቃዴ ተስማምቻለሁ።

ከላይ የተሰጠው መረጃ ሁሉ ለእርስዎ ግልጽ ነው? አዎ ..... አይደለም.....

ስለዚህ፣ በጥናቱ ለመሳተፍ ፈቃደኝነዎት? አዎ..... አይደለም.....

አዎ ከሆነ፣ የእርስዎ ፊርማ \_\_\_\_\_

ምስክሮች ስም፡ 1. \_\_\_\_\_ ፊርማ-----

2. \_\_\_\_\_ ፊርማ-----

3. \_\_\_\_\_ ፊርማ-----
